# Supplementary material for: Biochemical and structural characterization of a novel arginine kinase from the spiderPolybetes pythagoricus
Source: PeerJ journal article supplement (doi:10.7717/peerj.3787), 2017-09-11
Supplement: Molprobity_AK-ARG_5U92_CorrectedOutliers.pdf [file Molprobity_AK-ARG_5U92_CorrectedOutliers.pdf]

M

# Viewing spiderAK- ARG\_refine\_47FH-multi.table

When finished, you should  .

Hint: Use File | Save As... to save a copy of this page.

|                   |                                                                               |          |                                                         |                                |
|-------------------|-------------------------------------------------------------------------------|----------|---------------------------------------------------------|--------------------------------|
| All-Atom Contacts | Clashscore, all atoms:                                                        | 2.93     | 99 <sup>th</sup> percentile* (N=715, 2.000Å ± 0.25Å)    |                                |
|                   | Clashscore is the number of serious steric overlaps (> 0.4 Å) per 1000 atoms. |          |                                                         |                                |
| Protein Geometry  | Poor rotamers                                                                 | 2        | 0.68%                                                   | Goal: <0.3%                    |
|                   | Favored rotamers                                                              | 270      | 91.84%                                                  | Goal: >98%                     |
|                   | Ramachandran outliers                                                         | 0        | 0.00%                                                   | Goal: <0.05%                   |
|                   | Ramachandran favored                                                          | 334      | 98.24%                                                  | Goal: >98%                     |
|                   | MolProbity score <sup>^</sup>                                                 | 1.08     | 100 <sup>th</sup> percentile* (N=12522, 2.000Å ± 0.25Å) |                                |
|                   | Cβ deviations >0.25Å                                                          | 0        | 0.00%                                                   | Goal: 0                        |
|                   | Bad bonds:                                                                    | 0 / 2800 | 0.00%                                                   | Goal: 0%                       |
| Bad angles:       | 1 / 3778                                                                      | 0.03%    | Goal: <0.1%                                             |                                |
| Peptide Omegas    | Cis Prolines:                                                                 | 1 / 15   | 6.67%                                                   | Expected: ≤1 per chain, or ≤5% |

In the two column results, the left column gives the raw count, right column gives the percentage.

\* 100<sup>th</sup> percentile is the best among structures of comparable resolution; 0<sup>th</sup> percentile is the worst. For clashscore the comparative set of structures was selected in 2004, for MolProbity score in 2006.

<sup>^</sup> MolProbity score combines the clashscore, rotamer, and Ramachandran evaluations into a single score, normalized to be on the same scale as X-ray resolution.

| #   | Alt Res   | High B                         | Clash > 0.4Å | Ramachandran                                    | Rotamer                                                 | Cβ deviation       | Bond lengths       | Bond angles        | Cis Peptides        |
|-----|-----------|--------------------------------|--------------|-------------------------------------------------|---------------------------------------------------------|--------------------|--------------------|--------------------|---------------------|
|     |           | Avg: Clashscore: 34.13         |              | Outliers: 0 of 340                              | Poor rotamers: 2 of 294                                 | Outliers: 0 of 323 | Outliers: 0 of 348 | Outliers: 1 of 348 | Non-Trans: 1 of 345 |
| A 1 | ALA 39.83 | 0.47Å<br>N with S 251<br>HOH O | -            | Favored (24.63%)<br>Ile or Val /<br>-78.1,136.2 | Favored (83.8%)<br>t<br>chi angles: 177                 | 0.01Å              | -                  | -                  | -                   |
| A 2 | VAL 36.16 | -                              | -            | Favored (37.17%)<br>General /<br>-75.4,154.3    | Favored (46%)<br>p0<br>chi angles: 65.9,348.1           | 0.04Å              | -                  | -                  | -                   |
| A 3 | ASP 45.67 | -                              | -            | Favored (71.05%)<br>General /<br>-62.8,-29.9    | Favored (77.3%)<br>tp40<br>chi angles:<br>184,68.3,41.7 | 0.05Å              | -                  | -                  | -                   |

|      |           |                                 |                                                 |                                                                          |       |   |   |   |
|------|-----------|---------------------------------|-------------------------------------------------|--------------------------------------------------------------------------|-------|---|---|---|
| A 5  | ALA 35.34 | -                               | Favored<br>(97.9%)<br>General /<br>-63.7,-42.5  | -                                                                        | 0.02Å | - | - | - |
| A 6  | THR 34.43 | -                               | Favored<br>(86.6%)<br>General /<br>-67.2,-40.2  | Favored (47.6%) <i>m</i><br>chi angles: 304.4                            | 0.03Å | - | - | - |
| A 7  | LEU 36.01 | -                               | Favored<br>(88.36%)<br>General /<br>-61.5,-38.8 | Favored (93.8%)<br><i>mt</i><br>chi angles: 294.2,171.6                  | 0.04Å | - | - | - |
| A 8  | ASP 38.21 | -                               | Favored<br>(85.1%)<br>General /<br>-67.0,-42.4  | Favored (51.3%)<br><i>m-30</i><br>chi angles: 278.6,340.8                | 0.02Å | - | - | - |
| A 9  | LYS 41.09 | -                               | Favored<br>(98.32%)<br>General /<br>-63.3,-40.8 | Allowed (0.9%)<br><i>mttt</i><br>chi angles:<br>270.7,146.3,201.5,136.9  | 0.02Å | - | - | - |
| A 10 | LEU 36.56 | -                               | Favored<br>(81.3%)<br>General /<br>-59.0,-48.5  | Favored (28.4%)<br><i>mt</i><br>chi angles: 282.2,171                    | 0.03Å | - | - | - |
| A 11 | GLU 38.06 | -                               | Favored<br>(83.59%)<br>General /<br>-62.7,-36.6 | Favored (52.4%)<br><i>mm-30</i><br>chi angles:<br>287.5,283.9,358.4      | 0.02Å | - | - | - |
| A 12 | ALA 37.73 | -                               | Favored<br>(75.25%)<br>General /<br>-69.7,-35.8 | -                                                                        | 0.02Å | - | - | - |
| A 13 | GLY 37.35 | -                               | Favored<br>(70.47%)<br>Glycine /<br>-66.5,-47.3 | -                                                                        | -     | - | - | - |
| A 14 | PHE 39.36 | 0.41Å<br>O with A 18<br>GLN HG2 | Favored<br>(77.63%)<br>General /<br>-56.4,-48.1 | Favored (72.9%)<br><i>t80</i><br>chi angles: 174.8,85.7                  | 0.01Å | - | - | - |
| A 15 | LYS 41.89 | -                               | Favored<br>(91.82%)<br>General /<br>-60.8,-40.2 | Allowed (1.3%)<br><i>tttm</i><br>chi angles:<br>154.1,146.4,198.7,293.3  | 0.01Å | - | - | - |
| A 16 | LYS 41.8  | -                               | Favored<br>(75.82%)<br>General /<br>-62.6,-33.8 | Favored (18.2%)<br><i>tttt</i><br>chi angles:<br>175.7,172.2,182.6,212.8 | 0.02Å | - | - | - |
| A 17 | LEU 38.38 | -                               | Favored<br>(63.13%)<br>General /<br>-74.3,-33.4 | Favored (28.9%)<br><i>mt</i><br>chi angles: 285.6,159.9                  | 0.02Å | - | - | - |
| A 18 | GLN 44.72 | 0.41Å<br>HG2 with A<br>14 PHE O | Favored<br>(62.9%)<br>General /                 | Favored (14.6%)<br><i>mm-40</i><br>chi angles:                           | 0.04Å | - | - | - |

| #                                                                                                                                                                | Alt Res   | High B | Clash > 0.4Å | Ramachandran                              | Rotamer                                                               | Cβ deviation | Bond lengths | Bond angles | Cis Peptides |
|------------------------------------------------------------------------------------------------------------------------------------------------------------------|-----------|--------|--------------|-------------------------------------------|-----------------------------------------------------------------------|--------------|--------------|-------------|--------------|
| A 19                                                                                                                                                             | ASP 44.62 | -      | -            | Favored (58.06%)<br>General / -82.5,-12.0 | Favored (79.5%)<br><i>m-30</i><br>chi angles: 294,349.8               | 0.02Å        | -            | -           | -            |
| A 20                                                                                                                                                             | ALA 43.88 | -      | -            | Favored (6.29%)<br>General / -90.8,76.8   | -                                                                     | 0.03Å        | -            | -           | -            |
| Avg: Clashscore: 34.13    Outliers: 0 of 340    Poor rotamers: 2 of 294    Outliers: 0 of 323    Outliers: 0 of 348    Outliers: 1 of 348    Non-Trans: 1 of 345 |           |        |              |                                           |                                                                       |              |              |             |              |
| A 21                                                                                                                                                             | THR 46.84 | -      | -            | Favored (65.73%)<br>General / -59.0,-27.7 | Favored (70.9%) <i>p</i><br>chi angles: 59.3                          | 0.06Å        | -            | -           | -            |
| A 22                                                                                                                                                             | ASP 47.1  | -      | -            | -                                         | Favored (59.5%)<br><i>m-30</i><br>chi angles: 288.7,319.7             | 0.01Å        | -            | -           | -            |
| A 23                                                                                                                                                             | CSO 41.03 | -      | -            | -                                         | -                                                                     | 0.06Å        | -            | -           | -            |
| A 24                                                                                                                                                             | LYS 57.67 | -      | -            | -                                         | Allowed (1.2%)<br><i>mttp</i><br>chi angles: 280.1,130.3,163.7,51     | 0.03Å        | -            | -           | -            |
| A 25                                                                                                                                                             | SER 30.41 | -      | -            | Favored (32.8%)<br>General / -74.6,158.9  | Favored (75.6%) <i>p</i><br>chi angles: 59.9                          | 0.04Å        | -            | -           | -            |
| A 26                                                                                                                                                             | LEU 26.73 | -      | -            | Favored (73.62%)<br>General / -62.2,-32.9 | Favored (76.3%)<br><i>mt</i><br>chi angles: 299.7,181.4               | 0.04Å        | -            | -           | -            |
| A 27                                                                                                                                                             | LEU 25.22 | -      | -            | Favored (75.87%)<br>General / -55.7,-48.0 | Favored (75.5%) <i>tp</i><br>chi angles: 177.3,62.4                   | 0.01Å        | -            | -           | -            |
| A 28                                                                                                                                                             | LYS 39.43 | -      | -            | Favored (77.36%)<br>General / -68.5,-35.3 | Allowed (0.6%)<br><i>tttm</i><br>chi angles: 181.7,225.7,205.5,324.4  | 0.02Å        | -            | -           | -            |
| A 29                                                                                                                                                             | LYS 28.74 | -      | -            | Favored (99.69%)<br>General / -62.4,-42.8 | Favored (65.1%)<br><i>tttt</i><br>chi angles: 175.9,167.9,192.7,183.3 | 0.03Å        | -            | -           | -            |
| A 30                                                                                                                                                             | TYR 27.59 | -      | -            | Favored (16.49%)<br>General / -106.4,-9.9 | Favored (75.7%)<br><i>m-80</i><br>chi angles: 297,290.3               | 0.04Å        | -            | -           | -            |
| A 31                                                                                                                                                             | LEU 32.73 | -      | -            | Favored (10.23%)<br>General / -86.5,72.7  | Favored (32.6%) <i>tp</i><br>chi angles: 186,66.1                     | 0.04Å        | -            | -           | -            |

|          |                |               |                        |                                                    |                                                                          |                     |                     |                    |                     |
|----------|----------------|---------------|------------------------|----------------------------------------------------|--------------------------------------------------------------------------|---------------------|---------------------|--------------------|---------------------|
| A        | ASN            | 36.58         | -                      | Favored<br>(7.11%)<br>General /<br>-84.4,-179.2    | Favored (34.8%)<br><i>p0</i><br>chi angles: 62.8,39.9                    | 0.06Å               | -                   | -                  | -                   |
| A        | ARG            | 30            | -                      | Favored<br>(92.14%)<br>General /<br>-65.4,-39.5    | Favored (3.9%)<br><i>tpt170</i><br>chi angles:<br>182.3,74.9,217.1,185.7 | 0.02Å               | -                   | -                  | -                   |
| A        | GLU            | 36.53         | -                      | Favored<br>(69.73%)<br>General /<br>-71.8,-39.9    | Favored (3.9%)<br><i>tp30</i><br>chi angles:<br>198.1,45.9,67.9          | 0.01Å               | -                   | -                  | -                   |
| A        | VAL            | 31.29         | -                      | Favored<br>(95.62%)<br>Ile or Val /<br>-63.9,-42.4 | Favored (51.9%) <i>t</i><br>chi angles: 169.7                            | 0.06Å               | -                   | -                  | -                   |
| A        | PHE            | 32.71         | -                      | Favored<br>(95.02%)<br>General /<br>-60.6,-45.2    | Favored (85.5%)<br><i>t80</i><br>chi angles: 181.3,76.1                  | 0.03Å               | -                   | -                  | -                   |
| A        | ASP            | 35.85         | -                      | Favored<br>(67.97%)<br>General /<br>-69.8,-30.4    | Favored (4.6%)<br><i>m-30</i><br>chi angles: 274.5,304.8                 | 0.03Å               | -                   | -                  | -                   |
| A        | GLN            | 33.08         | -                      | Favored<br>(84.94%)<br>General /<br>-59.1,-40.3    | Favored (35.4%)<br><i>mt0</i><br>chi angles:<br>284.1,183.9,261.8        | 0.06Å               | -                   | -                  | -                   |
| A        | CYS            | 31.11         | -                      | Favored<br>(13.58%)<br>General /<br>-102.0,-26.0   | Favored (94.9%) <i>m</i><br>chi angles: 292                              | 0.05Å               | -                   | -                  | -                   |
| A        | LYS            | 34.66         | -                      | Favored<br>(67.72%)<br>General /<br>-64.7,-24.9    | Favored (8.2%)<br><i>pttm</i><br>chi angles:<br>65.7,181.1,205,289.8     | 0.01Å               | -                   | -                  | -                   |
| <b>#</b> | <b>Alt Res</b> | <b>High B</b> | <b>Clash &gt; 0.4Å</b> | <b>Ramachandran</b>                                | <b>Rotamer</b>                                                           | <b>Cβ deviation</b> | <b>Bond lengths</b> | <b>Bond angles</b> | <b>Cis Peptides</b> |
|          |                | Avg: 34.13    | Clashscore: 2.93       | Outliers: 0 of 340                                 | Poor rotamers: 2 of 294                                                  | Outliers: 0 of 323  | Outliers: 0 of 348  | Outliers: 1 of 348 | Non-Trans: 1 of 345 |
| A        | SER            | 37.81         | -                      | Favored<br>(36.8%)<br>General /<br>-102.6,12.1     | Allowed (0.9%) <i>m</i><br>chi angles: 272.6                             | 0.04Å               | -                   | -                  | -                   |
| A        | LEU            | 31.51         | -                      | Favored<br>(17.19%)<br>General /<br>-92.9,156.0    | Favored (54.6%)<br><i>mt</i><br>chi angles: 303.9,173.1                  | 0.02Å               | -                   | -                  | -                   |
| A        | LYS            | 34.53         | -                      | Favored<br>(9.36%)<br>General /<br>-153.7,128.3    | Favored (20%) <i>ttmt</i><br>chi angles:<br>180.6,187.1,271.5,177.8      | 0.01Å               | -                   | -                  | -                   |

|         |           |   |                                                   |                                                              |       |   |   |   |
|---------|-----------|---|---------------------------------------------------|--------------------------------------------------------------|-------|---|---|---|
| A<br>44 | THR 31.89 | - | Favored<br>(9.13%)<br>General /<br>-67.2,169.1    | Favored (50.5%) <i>p</i><br>chi angles: 65.6                 | 0.05Å | - | - | - |
| A<br>45 | ALA 33.83 | - | Favored<br>(67.24%)<br>General /<br>-66.7,-26.9   | -                                                            | 0.03Å | - | - | - |
| A<br>46 | LEU 34.85 | - | Favored<br>(57.83%)<br>General / -87.4,-1.3       | Favored (79.2%)<br><i>mt</i><br>chi angles: 293.5,167        | 0.02Å | - | - | - |
| A<br>47 | GLY 32.06 | - | Favored<br>(44.64%)<br>Glycine / 104.2,1.0        | -                                                            | -     | - | - | - |
| A<br>48 | ALA 28.96 | - | Favored<br>(44.94%)<br>General /<br>-73.1,137.1   | -                                                            | 0.03Å | - | - | - |
| A<br>49 | THR 27.09 | - | Favored<br>(4.71%)<br>General /<br>-110.4,177.4   | Favored (2.3%) <i>p</i><br>chi angles: 81.2                  | 0.05Å | - | - | - |
| A<br>50 | LEU 28.53 | - | Favored<br>(71.46%)<br>General /<br>-63.4,-30.3   | Favored (69.6%) <i>tp</i><br>chi angles: 176.3,62.9          | 0.03Å | - | - | - |
| A<br>51 | LEU 29.62 | - | Favored<br>(89.72%)<br>General /<br>-63.6,-38.1   | Favored (24.7%) <i>tp</i><br>chi angles: 189.6,61.8          | 0.01Å | - | - | - |
| A<br>52 | ASP 24.33 | - | Favored<br>(23.96%)<br>General / -65.8,-8.9       | Favored (60.6%)<br><i>m-30</i><br>chi angles: 302.4,309.2    | 0.01Å | - | - | - |
| A<br>53 | CYS 25.9  | - | Favored<br>(5.28%)<br>General /<br>-94.0,-50.5    | Favored (50.4%) <i>m</i><br>chi angles: 303.5                | 0.03Å | - | - | - |
| A<br>54 | ILE 24.47 | - | Favored<br>(9.73%)<br>Ile or Val /<br>-102.2,-2.0 | Favored (7.7%) <i>pt</i><br>chi angles: 71.4,183.5           | 0.05Å | - | - | - |
| A<br>55 | GLN 25.37 | - | Favored<br>(84.92%)<br>General /<br>-61.5,-37.8   | Favored (6.5%) <i>pt0</i><br>chi angles:<br>53.5,195.4,346.8 | 0.03Å | - | - | - |
| A<br>56 | SER 26.46 | - | Favored<br>(84.72%)<br>General /<br>-66.0,-37.0   | Favored (38.1%) <i>t</i><br>chi angles: 181.2                | 0.01Å | - | - | - |
| A<br>57 | GLY 27.65 | - | Favored<br>(79.71%)<br>Glycine /<br>-77.7,-16.8   | -                                                            | -     | - | - | - |

|          |                |               |                        |                                                     |                                                                     |                     |                     |                    |                     |
|----------|----------------|---------------|------------------------|-----------------------------------------------------|---------------------------------------------------------------------|---------------------|---------------------|--------------------|---------------------|
| A<br>58  | VAL            | 31.56         | -                      | Favored<br>(27.4%)<br>Ile or Val /<br>-77.5,-39.3   | Favored (18.2%) <i>t</i><br>chi angles: 164.3                       | 0.09Å               | -                   | -                  | -                   |
| A<br>59  | GLU            | 36.09         | -                      | Favored<br>(40.14%)<br>General /<br>-79.9,-33.0     | Favored (48.8%)<br><i>mm-30</i><br>chi angles:<br>295.4,303.9,293.6 | 0.03Å               | -                   | -                  | -                   |
| A<br>60  | ASN            | 29.84         | -                      | Favored<br>(3.48%)<br>General /<br>-112.4,91.0      | Favored (51.1%)<br><i>m-40</i><br>chi angles: 302.8,285.1           | 0.04Å               | -                   | -                  | -                   |
| <b>#</b> | <b>Alt Res</b> | <b>High B</b> | <b>Clash &gt; 0.4Å</b> | <b>Ramachandran</b>                                 | <b>Rotamer</b>                                                      | <b>Cβ deviation</b> | <b>Bond lengths</b> | <b>Bond angles</b> | <b>Cis Peptides</b> |
|          |                | Avg: 34.13    | Clashscore: 2.93       | Outliers: 0 of 340                                  | Poor rotamers: 2 of 294                                             | Outliers: 0 of 323  | Outliers: 0 of 348  | Outliers: 1 of 348 | Non-Trans: 1 of 345 |
| A<br>61  | LEU            | 34.62         | -                      | Favored<br>(61.62%)<br>General /<br>-71.2,-12.7     | Favored (31.5%)<br><i>mt</i><br>chi angles: 296.3,162.7             | 0.03Å               | -                   | -                  | -                   |
| A<br>62  | ASP            | 29.43         | -                      | Favored<br>(28.14%)<br>General / -87.1,7.4          | Favored (24.9%)<br><i>p0</i><br>chi angles: 58.9,335                | 0.04Å               | -                   | -                  | -                   |
| A<br>63  | SER            | 27.1          | -                      | Favored<br>(48.5%)<br>General /<br>-57.8,141.5      | Favored (59.7%) <i>m</i><br>chi angles: 299.1                       | 0.02Å               | -                   | -                  | -                   |
| A<br>64  | GLY            | 26.54         | -                      | Favored<br>(30.58%)<br>Glycine /<br>-76.1,-40.1     | -                                                                   | -                   | -                   | -                  | -                   |
| A<br>65  | VAL            | 26.06         | -                      | Allowed (0.8%)<br>Ile or Val /<br>-105.7,-70.2      | Favored (89.4%) <i>t</i><br>chi angles: 176.1                       | 0.09Å               | -                   | -                  | -                   |
| A<br>66  | GLY            | 22.04         | -                      | Favored<br>(55.33%)<br>Glycine / 97.5,9.3           | -                                                                   | -                   | -                   | -                  | -                   |
| A<br>67  | ILE            | 21.83         | -                      | Favored<br>(25.35%)<br>Ile or Val /<br>-138.4,147.6 | Favored (6.6%) <i>tt</i><br>chi angles: 199.3,176.8                 | 0.07Å               | -                   | -                  | -                   |
| A<br>68  | TYR            | 26.17         | -                      | Favored<br>(42.98%)<br>General /<br>-138.3,159.1    | Favored (89.2%)<br><i>m-80</i><br>chi angles: 290.9,273.3           | 0.07Å               | -                   | -                  | -                   |
| A<br>69  | ALA            | 21.3          | -                      | Favored<br>(46.35%)<br>Pre-Pro /<br>-98.8,124.3     | -                                                                   | 0.03Å               | -                   | -                  | -                   |
| A<br>70  | PRO            | 23.71         | -                      | Favored<br>(3.58%)<br>Trans-Pro /<br>-84.8,-20.7    | Favored (65.2%)<br><i>Cg_endo</i><br>chi angles:<br>31.4,319.6,33.2 | 0.02Å               | -                   | -                  | -                   |

|          |            |            |                   |                                                   |                                                                   |                         |                         |                         |                    |                         |
|----------|------------|------------|-------------------|---------------------------------------------------|-------------------------------------------------------------------|-------------------------|-------------------------|-------------------------|--------------------|-------------------------|
| A<br>71  | ASP        | 26.26      | -                 | Favored<br>(11.41%)<br>General /<br>-159.3,177.1  | Favored (43.6%)<br><i>p0</i><br>chi angles: 62,22.1               | 0.05Å                   | -                       | -                       | -                  |                         |
| A<br>72  | ALA        | 28.73      | -                 | Favored<br>(77.64%)<br>General /<br>-69.2,-40.9   | -                                                                 | 0.04Å                   | -                       | -                       | -                  |                         |
| A<br>73  | GLU        | 29.74      | -                 | Favored<br>(71.99%)<br>General /<br>-57.5,-36.9   | Favored (74.6%)<br><i>tt0</i><br>chi angles:<br>184.5,186.4,347.1 | 0.03Å                   | -                       | -                       | -                  |                         |
| A<br>74  | ALA        | 24.48      | -                 | Favored<br>(21.25%)<br>General /<br>-51.6,-30.5   | -                                                                 | 0.02Å                   | -                       | -                       | -                  |                         |
| A<br>75  | TYR        | 24.73      | -                 | Favored<br>(94.93%)<br>General /<br>-64.9,-40.4   | Favored (9.3%)<br><i>m-80</i><br>chi angles: 272.3,299.8          | 0.02Å                   | -                       | -                       | -                  |                         |
| A<br>76  | THR        | 24.31      | -                 | Favored (10%)<br>General /<br>-80.8,-50.3         | Favored (39.6%) <i>m</i><br>chi angles: 305.2                     | 0.10Å                   | -                       | -                       | -                  |                         |
| A<br>77  | LEU        | 27.21      | -                 | Favored<br>(83.45%)<br>General /<br>-58.9,-40.1   | Favored (47.7%) <i>tp</i><br>chi angles: 173.9,65.7               | 0.03Å                   | -                       | -                       | -                  |                         |
| A<br>78  | PHE        | 26.23      | -                 | Favored<br>(5.32%)<br>General /<br>-100.7,28.2    | Favored (85.8%)<br><i>m-80</i><br>chi angles: 297.5,286.3         | 0.04Å                   | -                       | -                       | -                  |                         |
| A<br>79  | ALA        | 24.82      | -                 | Favored<br>(6.74%)<br>Pre-Pro /<br>-50.5,-32.7    | -                                                                 | 0.04Å                   | -                       | -                       | -                  |                         |
| A<br>80  | PRO        | 27.03      | -                 | Favored<br>(86.13%)<br>Trans-Pro /<br>-61.1,-28.9 | Favored (55.2%)<br><i>Cg_exo</i><br>chi angles:<br>328.1,39,329.8 | 0.02Å                   | -                       | -                       | -                  |                         |
| <b>#</b> | <b>Alt</b> | <b>Res</b> | <b>High<br/>B</b> | <b>Clash &gt;<br/>0.4Å</b>                        | <b>Ramachandran</b>                                               | <b>Rotamer</b>          | <b>Cβ<br/>deviation</b> | <b>Bond<br/>lengths</b> | <b>Bond angles</b> | <b>Cis<br/>Peptides</b> |
|          |            |            | Avg: 34.13        | Clashscore: 2.93                                  | Outliers: 0 of 340                                                | Poor rotamers: 2 of 294 | Outliers: 0 of 323      | Outliers: 0 of 348      | Outliers: 1 of 348 | Non-Trans: 1 of 345     |
| A<br>81  | ILE        | 25.74      | -                 | Favored<br>(4.82%)<br>Ile or Val /<br>-99.1,-35.3 | Favored (4.2%) <i>tp</i><br>chi angles: 181.5,56.1                | 0.06Å                   | -                       | -                       | -                  |                         |
| A<br>82  | PHE        | 22.64      | -                 | Favored<br>(79.56%)<br>General /<br>-66.0,-46.0   | Favored (14.2%)<br><i>m-80</i><br>chi angles: 275.2,299.6         | 0.02Å                   | -                       | -                       | -                  |                         |
| A<br>83  | ASN        | 23.76      | -                 | Favored<br>(96.43%)<br>Pre-Pro /                  | Favored (63.8%)<br><i>m-40</i><br>chi angles: 280.6,353.1         | 0.06Å                   | -                       | -                       | -                  |                         |

|         |           |   |                                                                  |                                                                         |       |   |   |   |
|---------|-----------|---|------------------------------------------------------------------|-------------------------------------------------------------------------|-------|---|---|---|
| A<br>84 | PRO 22.33 | - | -57.4,-49.0<br>Favored<br>(47.54%)<br>Trans-Pro /<br>-66.1,-30.1 | Favored (29.9%)<br><i>Cg_endo</i><br>chi angles:<br>21.3,328.7,28.4     | 0.03Å | - | - | - |
| A<br>85 | ILE 24.36 | - | Favored<br>(65.53%)<br>Ile or Val /<br>-72.3,-40.6               | Favored (49.3%)<br><i>mt</i><br>chi angles: 295.3,180.1                 | 0.06Å | - | - | - |
| A<br>86 | ILE 22.59 | - | Favored<br>(85.58%)<br>Ile or Val /<br>-60.3,-49.1               | Favored (59.8%)<br><i>mt</i><br>chi angles: 286.9,166.2                 | 0.07Å | - | - | - |
| A<br>87 | GLU 27.94 | - | Favored<br>(51.77%)<br>General /<br>-52.7,-53.1                  | Favored (12.2%)<br><i>tm-30</i><br>chi angles:<br>190.8,287,318.5       | 0.04Å | - | - | - |
| A<br>88 | ASP 25.84 | - | Favored<br>(26.61%)<br>General /<br>-59.0,-56.1                  | Favored (16.2%) <i>t0</i><br>chi angles: 195.4,316.1                    | 0.04Å | - | - | - |
| A<br>89 | TYR 28.28 | - | Favored<br>(99.43%)<br>General /<br>-61.7,-42.8                  | Favored (79.9%)<br><i>t80</i><br>chi angles: 182.2,85.3                 | 0.05Å | - | - | - |
| A<br>90 | HIS 24.21 | - | Favored<br>(14.3%)<br>General / -90.0,13.7                       | Favored (89.1%)<br><i>m-70</i><br>chi angles: 294.7,274.2               | 0.08Å | - | - | - |
| A<br>91 | GLU 34.06 | - | Favored<br>(2.82%)<br>General / 58.5,59.8                        | Favored (64.6%)<br><i>mt-10</i><br>chi angles:<br>281,182.1,3.3         | 0.06Å | - | - | - |
| A<br>92 | GLY 27.32 | - | Favored<br>(10.38%)<br>Glycine / 109.8,16.8                      | -                                                                       | -     | - | - | - |
| A<br>93 | PHE 22.42 | - | Favored<br>(8.57%)<br>General / -88.5,90.9                       | Favored (38.3%)<br><i>t80</i><br>chi angles: 193.4,85.7                 | 0.04Å | - | - | - |
| A<br>94 | LYS 35.48 | - | Favored<br>(80.57%)<br>Pre-Pro /<br>-70.8,160.9                  | Favored (6.1%)<br><i>mmtm</i><br>chi angles:<br>319.9,299.4,175.8,320.6 | 0.03Å | - | - | - |
| A<br>95 | PRO 26.18 | - | Favored<br>(55.83%)<br>Trans-Pro /<br>-56.5,-25.1                | Favored (82.1%)<br><i>Cg_exo</i><br>chi angles:<br>334.5,30,338         | 0.03Å | - | - | - |
| A<br>96 | THR 33.41 | - | Favored<br>(49.72%)<br>General / -94.2,-4.0                      | Favored (14.4%) <i>p</i><br>chi angles: 47.6                            | 0.03Å | - | - | - |
| A<br>97 | ASP 24.78 | - | Favored<br>(23.56%)<br>General /<br>-79.0,165.3                  | Favored (35%)<br><i>m-30</i><br>chi angles: 276.7,338.2                 | 0.01Å | - | - | - |



|          |                |               |                           |                                                    |                                                                          |                       |                       |                       |                        |
|----------|----------------|---------------|---------------------------|----------------------------------------------------|--------------------------------------------------------------------------|-----------------------|-----------------------|-----------------------|------------------------|
| A<br>98  | LYS            | 30.46         | -                         | Favored<br>(29.74%)<br>General /<br>-141.1,134.5   | Favored (75.9%)<br><i>tttt</i><br>chi angles:<br>170.7,178.5,181.9,176.8 | 0.03Å                 | -                     | -                     | -                      |
| A<br>99  | HIS            | 21.01         | -                         | Favored<br>(43.26%)<br>Pre-Pro /<br>-83.6,142.8    | Favored (82.6%)<br><i>t70</i><br>chi angles: 178.4,79.8                  | 0.06Å                 | -                     | -                     | -                      |
| A<br>100 | PRO            | 21.45         | -                         | Favored<br>(46.72%)<br>Trans-Pro /<br>-66.8,160.4  | Favored (35%)<br><i>Cg_endo</i><br>chi angles:<br>22.3,323.2,36.7        | 0.04Å                 | -                     | -                     | -                      |
| <b>#</b> | <b>Alt Res</b> | <b>High B</b> | <b>Clash &gt; 0.4Å</b>    | <b>Ramachandran</b>                                | <b>Rotamer</b>                                                           | <b>Cβ deviation</b>   | <b>Bond lengths</b>   | <b>Bond angles</b>    | <b>Cis Peptides</b>    |
|          |                |               | Avg: Clashscore:<br>34.13 | Outliers: 0 of<br>340                              | Poor rotamers: 2 of<br>294                                               | Outliers: 0 of<br>323 | Outliers: 0 of<br>348 | Outliers: 1 of<br>348 | Non-Trans: 1<br>of 345 |
| A<br>101 | PRO            | 23.51         | -                         | Favored<br>(41.16%)<br>Trans-Pro /<br>-63.3,159.1  | Favored (3%)<br><i>Cg_exo</i><br>chi angles:<br>354.7,17.7,337.3         | 0.05Å                 | -                     | -                     | -                      |
| A<br>102 | THR            | 24.09         | -                         | Favored<br>(55.61%)<br>General /<br>-58.0,133.5    | Favored (13.7%) <i>m</i><br>chi angles: 311.1                            | 0.05Å                 | -                     | -                     | -                      |
| A<br>103 | ASP            | 27.25         | -                         | Favored<br>(3.03%)<br>General /<br>-155.3,110.6    | Favored (42%) <i>t0</i><br>chi angles: 186.9,12.5                        | 0.03Å                 | -                     | -                     | -                      |
| A<br>104 | PHE            | 30.83         | -                         | Favored<br>(56.07%)<br>General /<br>-83.0,-13.4    | Favored (71.9%)<br><i>m-80</i><br>chi angles: 300.7,289.8                | 0.03Å                 | -                     | -                     | -                      |
| A<br>105 | GLY            | 31.92         | -                         | Favored<br>(53.74%)<br>Glycine /<br>77.9,-167.7    | -                                                                        | -                     | -                     | -                     | -                      |
| A<br>106 | ASP            | 36.32         | -                         | Favored<br>(11.16%)<br>General / -87.6,98.0        | Favored (41.6%) <i>t0</i><br>chi angles: 190.7,2.8                       | 0.05Å                 | -                     | -                     | -                      |
| A<br>107 | ILE            | 33.02         | -                         | Favored<br>(35.67%)<br>Ile or Val /<br>-60.7,-25.7 | Favored (3.1%) <i>tp</i><br>chi angles: 185.2,51.8                       | 0.08Å                 | -                     | -                     | -                      |
| A<br>108 | ASN            | 38.05         | -                         | Favored (59%)<br>General / -77.3,-9.8              | Favored (10.2%)<br><i>m-40</i><br>chi angles: 275.5,262.8                | 0.04Å                 | -                     | -                     | -                      |
| A<br>109 | THR            | 33.28         | -                         | Favored<br>(58.02%)<br>General / -84.3,-3.1        | Favored (16.9%) <i>p</i><br>chi angles: 73.9                             | 0.03Å                 | -                     | -                     | -                      |
| A<br>110 | ILE            | 29.73         | -                         | Favored<br>(15.89%)<br>Ile or Val /<br>-83.9,140.6 | Favored (45.6%)<br><i>mm</i><br>chi angles: 298,299.4                    | 0.05Å                 | -                     | -                     | -                      |

|          |     |       |   |                                                     |                                                                          |       |   |   |   |
|----------|-----|-------|---|-----------------------------------------------------|--------------------------------------------------------------------------|-------|---|---|---|
| A<br>111 | VAL | 31.07 | - | Favored<br>(21.98%)<br>Ile or Val /<br>-125.9,166.4 | Favored (3.4%) <i>m</i><br>chi angles: 309.6                             | 0.04Å | - | - | - |
| A<br>112 | ASN | 31.67 | - | Favored<br>(24.09%)<br>General /<br>-73.2,123.7     | Favored (38.3%) <i>t0</i><br>chi angles: 188.9,310.8                     | 0.04Å | - | - | - |
| A<br>113 | VAL | 27.75 | - | Favored<br>(14.23%)<br>Ile or Val /<br>-77.6,-14.2  | Favored (6.4%) <i>m</i><br>chi angles: 288.4                             | 0.05Å | - | - | - |
| A<br>114 | ASP | 28.88 | - | Favored<br>(5.11%)<br>Pre-Pro /<br>-156.0,73.8      | Favored (25.2%) <i>t0</i><br>chi angles: 179.2,27.4                      | 0.03Å | - | - | - |
| A<br>115 | PRO | 35.7  | - | Favored<br>(43.02%)<br>Trans-Pro /<br>-58.9,-18.6   | Favored (7.8%)<br><i>Cg_exo</i><br>chi angles:<br>348.5,26.3,329.9       | 0.03Å | - | - | - |
| A<br>116 | SER | 34.05 | - | Favored<br>(68.93%)<br>General /<br>-68.8,-30.4     | Favored (6.8%) <i>p</i><br>chi angles: 84                                | 0.01Å | - | - | - |
| A<br>117 | GLY | 30.05 | - | Favored<br>(61.65%)<br>Glycine / 74.2,2.0           | -                                                                        | -     | - | - | - |
| A<br>118 | LYS | 32.39 | - | Favored<br>(41.11%)<br>General /<br>-80.3,-23.0     | Favored (36.5%)<br><i>mtmt</i><br>chi angles:<br>302.3,199.4,285.1,180.1 | 0.04Å | - | - | - |
| A<br>119 | TYR | 27.77 | - | Allowed<br>(1.76%)<br>General /<br>-124.1,-52.3     | Favored (66.5%)<br><i>m-80</i><br>chi angles: 303.8,287.9                | 0.04Å | - | - | - |
| A<br>120 | VAL | 25.09 | - | Favored<br>(32.77%)<br>Ile or Val /<br>-86.2,118.5  | Favored (94.7%) <i>t</i><br>chi angles: 174.8                            | 0.03Å | - | - | - |

| # | Alt | Res | <u>High</u><br><u>B</u> | <u>Clash &gt;</u><br><u>0.4Å</u> | <u>Ramachandran</u> | <u>Rotamer</u> | <u>Cβ</u><br><u>deviation</u> | <u>Bond</u><br><u>lengths</u> | <u>Bond angles</u> | <u>Cis</u><br><u>Peptides</u> |
|---|-----|-----|-------------------------|----------------------------------|---------------------|----------------|-------------------------------|-------------------------------|--------------------|-------------------------------|
|   |     |     | Avg: Clashscore:        | Outliers: 0 of                   | Poor rotamers: 2 of | Outliers: 0 of | Outliers: 0 of                | Outliers: 1 of                | Non-Trans: 1 of    |                               |
|   |     |     | 34.13                   | 340                              | 294                 | 323            | 348                           | 348                           | 345                |                               |

|          |     |       |   |                                                    |                                               |       |   |   |   |
|----------|-----|-------|---|----------------------------------------------------|-----------------------------------------------|-------|---|---|---|
| A<br>121 | VAL | 27.64 | - | Favored<br>(26.97%)<br>Ile or Val /<br>-75.7,-49.3 | Favored (84.2%) <i>t</i><br>chi angles: 173.4 | 0.07Å | - | - | - |
| A<br>122 | SER | 24.65 | - | Favored<br>(35.96%)<br>General /<br>-151.2,154.0   | Favored (7.6%) <i>p</i><br>chi angles: 49.4   | 0.05Å | - | - | - |
| A<br>123 | THR | 24.23 | - | Favored<br>(47.48%)                                | Favored (88.4%) <i>m</i><br>chi angles: 301.3 | 0.04Å | - | - | - |

|          |     |       |                                 |                                                                               |                                                                            |       |   |   |   |
|----------|-----|-------|---------------------------------|-------------------------------------------------------------------------------|----------------------------------------------------------------------------|-------|---|---|---|
| A<br>124 | HIS | 26.21 | -                               | General /<br>-122.7,146.4<br>Favored<br>(25.83%)<br>General /<br>-146.6,140.1 | Allowed (1.3%)<br><i>m-70</i><br>chi angles: 323.6,260.5                   | 0.07Å | - | - | - |
| A<br>125 | VAL | 24.51 | -                               | Favored<br>(33.97%)<br>Ile or Val /<br>-131.0,116.5                           | Favored (32.7%) <i>t</i><br>chi angles: 185.5                              | 0.06Å | - | - | - |
| A<br>126 | ARG | 30    | -                               | Favored<br>(46.52%)<br>General /<br>-109.4,137.9                              | Favored (26.4%)<br><i>ttm170</i><br>chi angles:<br>173.7,197.9,296.1,172.2 | 0.06Å | - | - | - |
| A<br>127 | CYS | 25.49 | -                               | Favored<br>(15.38%)<br>General /<br>-135.7,170.8                              | Favored (11.4%) <i>p</i><br>chi angles: 74.5                               | 0.04Å | - | - | - |
| A<br>128 | GLY | 20.71 | -                               | Favored<br>(21.29%)<br>Glycine /<br>-135.1,153.8                              | -                                                                          | -     | - | - | - |
| A<br>129 | ARG | 30    | -                               | Favored<br>(23.31%)<br>General /<br>-147.4,137.8                              | Favored (86.5%)<br><i>mmt-90</i><br>chi angles:<br>294.2,286.8,189.4,267.3 | 0.06Å | - | - | - |
| A<br>130 | SER | 21.3  | -                               | Favored<br>(30.16%)<br>General /<br>-99.0,142.7                               | Favored (63.3%) <i>m</i><br>chi angles: 297.8                              | 0.02Å | - | - | - |
| A<br>131 | LEU | 27.18 | -                               | Favored<br>(35.26%)<br>General /<br>-90.0,132.7                               | Favored (33.3%)<br><i>mt</i><br>chi angles: 306.4,171.8                    | 0.01Å | - | - | - |
| A<br>132 | LYS | 34.18 | 0.67Å<br>NZ with S<br>213 HOH O | Favored<br>(57.93%)<br>General /<br>-62.3,136.4                               | Allowed (1.5%) <i>tttt</i><br>chi angles:<br>186.7,142.7,147.1,215.2       | 0.01Å | - | - | - |
| A<br>133 | GLY | 28.12 | -                               | Favored<br>(64.46%)<br>Glycine / 96.5,-14.3                                   | -                                                                          | -     | - | - | - |
| A<br>134 | TYR | 34.53 | -                               | Favored<br>(22.58%)<br>Pre-Pro /<br>-102.7,141.5                              | Favored (77.4%)<br><i>m-80</i><br>chi angles: 288.3,274                    | 0.04Å | - | - | - |
| A<br>135 | PRO | 29.35 | -                               | Favored<br>(10.76%)<br>Trans-Pro /<br>-65.2,170.3                             | Allowed (1%)<br><i>Cg_exo</i><br>chi angles:<br>359.5,13.5,339.4           | 0.02Å | - | - | - |
| A<br>136 | PHE | 24.47 | -                               | Favored<br>(7.27%)<br>General /<br>-89.1,175.7                                | Favored (10.1%)<br><i>m-10</i><br>chi angles: 297.2,353.7                  | 0.06Å | - | - | - |

| #                                                                                                                                                                                        | Alt | Res   | High<br>B                             | Clash ><br>0.4Å | Ramachandran                                      | Rotamer                                                                | Cβ<br>deviation | Bond<br>lengths | Bond angles | Cis<br>Peptides |
|------------------------------------------------------------------------------------------------------------------------------------------------------------------------------------------|-----|-------|---------------------------------------|-----------------|---------------------------------------------------|------------------------------------------------------------------------|-----------------|-----------------|-------------|-----------------|
| A<br>137                                                                                                                                                                                 | ASN | 25.47 | 0.60Å<br>HA with A<br>140 LEU<br>HD12 | -               | Favored<br>(7.58%)<br>Pre-Pro /<br>-55.1,-30.6    | Favored (9.5%)<br><i>m-40</i><br>chi angles: 268.6,275.4               | 0.08Å           | -               | -           | -               |
| A<br>138                                                                                                                                                                                 | PRO | 26.17 | -                                     | -               | Favored<br>(68.73%)<br>Trans-Pro /<br>-61.4,-20.5 | Favored (85.5%)<br><i>Cg_exo</i><br>chi angles:<br>333.9,35.6,329.4    | 0.03Å           | -               | -           | -               |
| A<br>139                                                                                                                                                                                 | CYS | 27.99 | -                                     | -               | Favored (5%)<br>General /<br>-131.4,12.7          | Favored (93.1%) <i>m</i><br>chi angles: 291.8                          | 0.01Å           | -               | -           | -               |
| A<br>140                                                                                                                                                                                 | LEU | 26.81 | 0.60Å<br>HD12 with A<br>137 ASN HA    | -               | Favored<br>(41.72%)<br>General /<br>-76.1,142.2   | Favored (17.8%)<br><i>mt</i><br>chi angles: 286.1,157.5                | 0.05Å           | -               | -           | -               |
| <p>Avg: Clashscore: 34.13    Clashes: 2.93    Outliers: 0 of 340    Poor rotamers: 2 of 294    Outliers: 0 of 323    Outliers: 0 of 348    Outliers: 1 of 348    Non-Trans: 1 of 345</p> |     |       |                                       |                 |                                                   |                                                                        |                 |                 |             |                 |
| A<br>141                                                                                                                                                                                 | THR | 32.2  | -                                     | -               | Favored<br>(13.43%)<br>General /<br>-91.2,165.5   | Favored (60.2%) <i>p</i><br>chi angles: 64                             | 0.07Å           | -               | -           | -               |
| A<br>142                                                                                                                                                                                 | GLU | 33.44 | -                                     | -               | Favored<br>(72.36%)<br>General /<br>-54.4,-44.6   | Favored (4.5%) <i>tt0</i><br>chi angles:<br>192.9,147.8,30.1           | 0.03Å           | -               | -           | -               |
| A<br>143                                                                                                                                                                                 | ALA | 28.9  | -                                     | -               | Favored<br>(99.06%)<br>General /<br>-63.3,-42.4   | -                                                                      | 0.01Å           | -               | -           | -               |
| A<br>144                                                                                                                                                                                 | ASN | 27.56 | -                                     | -               | Favored<br>(8.74%)<br>General /<br>-52.7,-57.9    | Favored (7.3%)<br><i>m110</i><br>chi angles: 290.6,153.3               | 0.06Å           | -               | -           | -               |
| A<br>145                                                                                                                                                                                 | TYR | 25.75 | -                                     | -               | Favored<br>(36.23%)<br>General /<br>-48.8,-50.1   | Favored (26.3%)<br><i>m-80</i><br>chi angles: 278.3,289.8              | 0.02Å           | -               | -           | -               |
| A<br>146                                                                                                                                                                                 | LYS | 43.7  | -                                     | -               | Favored (75%)<br>General /<br>-58.7,-50.1         | Favored (69.7%)<br><i>mttt</i><br>chi angles:<br>277.7,188,180.4,172.7 | 0.02Å           | -               | -           | -               |
| A<br>147                                                                                                                                                                                 | GLU | 37.46 | 0.64Å<br>OE1 with S<br>77 HOH O       | -               | Favored<br>(97.17%)<br>General /<br>-64.0,-42.4   | Favored (14.7%)<br><i>tt0</i><br>chi angles:<br>168.6,198.6,358.7      | 0.03Å           | -               | -           | -               |
| A<br>148                                                                                                                                                                                 | MET | 26.65 | -                                     | -               | Favored<br>(97.5%)<br>General /<br>-61.0,-44.4    | Favored (41.8%)<br><i>ttm</i><br>chi angles:<br>184.7,189,298.5        | 0.02Å           | -               | -           | -               |
| A<br>149                                                                                                                                                                                 | GLU | 29.3  | -                                     | -               | Favored<br>(88.28%)<br>General /                  | Favored (59.3%)<br><i>tt0</i><br>chi angles:                           | 0.02Å           | -               | -           | -               |

|          |     |       |                                  |                                                                |                                                                          |       |   |   |   |
|----------|-----|-------|----------------------------------|----------------------------------------------------------------|--------------------------------------------------------------------------|-------|---|---|---|
| A<br>150 | ASP | 34.89 | -                                | -61.8,-38.5<br>Favored<br>(99.05%)<br>General /<br>-61.6,-42.5 | 179.4,183,26.1<br>Favored (36.7%) <i>t0</i><br>chi angles: 193.6,7.4     | 0.05Å | - | - | - |
| A<br>151 | LYS | 33.94 | -                                | Favored<br>(68.59%)<br>General /<br>-71.5,-42.1                | Favored (12.7%)<br><i>mttm</i><br>chi angles:<br>300.2,176.8,180.5,326.4 | 0.03Å | - | - | - |
| A<br>152 | VAL | 29.35 | -                                | Favored<br>(82.4%)<br>Ile or Val /<br>-66.7,-47.7              | Allowed (1.8%) <i>t</i><br>chi angles: 158.1                             | 0.10Å | - | - | - |
| A<br>153 | SER | 31.43 | -                                | Favored<br>(81.89%)<br>General /<br>-61.7,-36.8                | Favored (65.4%) <i>p</i><br>chi angles: 58.3                             | 0.03Å | - | - | - |
| A<br>154 | ALA | 31.59 | -                                | Favored<br>(77.72%)<br>General /<br>-56.0,-47.5                | -                                                                        | 0.04Å | - | - | - |
| A<br>155 | ILE | 31.37 | -                                | Favored<br>(96.35%)<br>Ile or Val /<br>-61.6,-46.5             | Favored (70.1%)<br><i>mt</i><br>chi angles: 292.3,160.7                  | 0.05Å | - | - | - |
| A<br>156 | PHE | 30.05 | -                                | Favored<br>(67.68%)<br>General /<br>-56.7,-34.7                | Favored (22.6%)<br><i>m-10</i><br>chi angles: 294.2,344.5                | 0.02Å | - | - | - |
| A<br>157 | GLY | 34.44 | -                                | Favored<br>(60.69%)<br>Glycine /<br>-59.6,-25.1                | -                                                                        | -     | - | - | - |
| A<br>158 | THR | 34.53 | -                                | Favored<br>(56.27%)<br>General /<br>-85.7,-10.1                | Favored (24.8%) <i>p</i><br>chi angles: 71                               | 0.02Å | - | - | - |
| A<br>159 | PHE | 32.37 | 0.41Å<br>O with A 164<br>LYS HD3 | Favored<br>(46.44%)<br>General /<br>-58.4,130.4                | Favored (7.5%)<br><i>m-10</i><br>chi angles: 282.1,350.2                 | 0.04Å | - | - | - |
| A<br>160 | GLU | 43.26 | -                                | Favored<br>(5.14%)<br>General /<br>-126.4,179.8                | Allowed (0.6%)<br><i>mp0</i><br>chi angles:<br>324.9,108.8,302.1         | 0.03Å | - | - | - |

# Alt Res High B Clash > 0.4Å Ramachandran Rotamer Cβ deviation Bond lengths Bond angles Cis Peptides

Avg: Clashscore: 34.13    Outliers: 0 of 340    Poor rotamers: 2 of 294    Outliers: 0 of 323    Outliers: 0 of 348    Outliers: 1 of 348    Non-Trans: 1 of 345

|          |     |       |   |                                                 |   |   |   |   |   |
|----------|-----|-------|---|-------------------------------------------------|---|---|---|---|---|
| A<br>161 | GLY | 32.73 | - | Favored<br>(36.66%)<br>Glycine /<br>71.7,-144.3 | - | - | - | - | - |
|----------|-----|-------|---|-------------------------------------------------|---|---|---|---|---|

|          |           |                                  |                                                   |                                                                         |       |   |   |   |
|----------|-----------|----------------------------------|---------------------------------------------------|-------------------------------------------------------------------------|-------|---|---|---|
| A<br>162 | GLU 32.22 | 0.72Å<br>OE1 with S<br>237 HOH O | Favored<br>(64.55%)<br>General /<br>-66.8,-16.9   | Favored (12.5%)<br><i>pt0</i><br>chi angles:<br>72.3,172.8,160.9        | 0.01Å | - | - | - |
| A<br>163 | LEU 29.75 | -                                | Favored<br>(53.99%)<br>General /<br>-85.6,-11.4   | Favored (14.8%)<br><i>mt</i><br>chi angles: 290.6,189.4                 | 0.04Å | - | - | - |
| A<br>164 | LYS 30.76 | 0.41Å<br>HD3 with A<br>159 PHE O | Favored<br>(44.33%)<br>General /<br>-66.1,130.8   | Favored (2.2%)<br><i>tptp</i><br>chi angles:<br>185.5,36.2,189.4,52.1   | 0.03Å | - | - | - |
| A<br>165 | GLY 27.82 | -                                | Favored<br>(3.89%)<br>Glycine /<br>-164.2,-144.0  | -                                                                       | -     | - | - | - |
| A<br>166 | LYS 28.59 | -                                | Favored<br>(36.9%)<br>General /<br>-139.6,139.8   | Favored (38.6%)<br><i>ttm</i><br>chi angles:<br>193.4,168.8,191.4,297.2 | 0.03Å | - | - | - |
| A<br>167 | TYR 28.31 | -                                | Favored<br>(37.69%)<br>General /<br>-95.0,134.5   | Favored (70.2%)<br><i>t80</i><br>chi angles: 180.3,68.2                 | 0.01Å | - | - | - |
| A<br>168 | TYR 27.85 | -                                | Favored<br>(52.26%)<br>Pre-Pro /<br>-116.2,104.2  | Favored (34.6%)<br><i>m-80</i><br>chi angles: 305.4,80.7                | 0.03Å | - | - | - |
| A<br>169 | PRO 27.17 | -                                | Favored<br>(63.96%)<br>Trans-Pro /<br>-64.8,139.7 | Allowed (1.7%)<br><i>Cg_exo</i><br>chi angles:<br>358.3,9.5,346.8       | 0.04Å | - | - | - |
| A<br>170 | LEU 26.2  | -                                | Favored<br>(66.64%)<br>General /<br>-70.1,-29.6   | Favored (2.5%) <i>mp</i><br>chi angles: 259.7,54.3                      | 0.05Å | - | - | - |
| A<br>171 | THR 25.77 | -                                | Favored<br>(15.12%)<br>General /<br>-67.2,121.2   | Favored (95.3%) <i>m</i><br>chi angles: 300.8                           | 0.03Å | - | - | - |
| A<br>172 | GLY 25.06 | -                                | Favored<br>(79.48%)<br>Glycine / 74.0,17.5        | -                                                                       | -     | - | - | - |
| A<br>173 | MET 23.43 | -                                | Favored<br>(41.6%)<br>General /<br>-72.7,130.9    | Favored (59.9%)<br><i>ttm</i><br>chi angles:<br>183.5,175.3,287.7       | 0.05Å | - | - | - |
| A<br>174 | ASP 24.47 | -                                | Favored<br>(19.02%)<br>General /<br>-87.0,159.4   | Favored (2.8%) <i>p0</i><br>chi angles: 66.8,71.9                       | 0.04Å | - | - | - |
| A<br>175 | LYS 28.89 | -                                | Favored<br>(69.94%)<br>General /<br>-63.6,-28.4   | Favored (4.7%) <i>tttp</i><br>chi angles:<br>212.7,176.6,169.7,89.4     | 0.03Å | - | - | - |

|          |                |               |                        |                                                    |                                                                   |                     |                     |                    |                     |
|----------|----------------|---------------|------------------------|----------------------------------------------------|-------------------------------------------------------------------|---------------------|---------------------|--------------------|---------------------|
| A<br>176 | ALA            | 24.84         | -                      | Favored<br>(63.51%)<br>General /<br>-72.2,-44.1    | -                                                                 | 0.03Å               | -                   | -                  | -                   |
| A<br>177 | THR            | 24.8          | -                      | Favored<br>(77.62%)<br>General /<br>-56.3,-47.9    | Favored (99.5%) <i>m</i><br>chi angles: 300.5                     | 0.07Å               | -                   | -                  | -                   |
| A<br>178 | GLN            | 28.55         | -                      | Favored<br>(74.14%)<br>General /<br>-54.8,-47.4    | Favored (80.1%)<br><i>mt0</i><br>chi angles:<br>283,174.8,347.9   | 0.02Å               | -                   | -                  | -                   |
| A<br>179 | GLN            | 31.95         | -                      | Favored<br>(91.28%)<br>General /<br>-63.6,-38.5    | Favored (85.9%)<br><i>tp40</i><br>chi angles:<br>186.6,61,43.5    | 0.01Å               | -                   | -                  | -                   |
| A<br>180 | GLN            | 35.19         | -                      | Favored<br>(80.89%)<br>General /<br>-57.2,-42.4    | Favored (36.5%)<br><i>tt0</i><br>chi angles:<br>172.8,186.4,336.2 | 0.07Å               | -                   | -                  | -                   |
| <b>#</b> | <b>Alt Res</b> | <b>High B</b> | <b>Clash &gt; 0.4Å</b> | <b>Ramachandran</b>                                | <b>Rotamer</b>                                                    | <b>Cβ deviation</b> | <b>Bond lengths</b> | <b>Bond angles</b> | <b>Cis Peptides</b> |
|          |                |               | Avg: Clashscore: 34.13 | Outliers: 0 of 340                                 | Poor rotamers: 2 of 294                                           | Outliers: 0 of 323  | Outliers: 0 of 348  | Outliers: 1 of 348 | Non-Trans: 1 of 345 |
| A<br>181 | LEU            | 25.24         | -                      | Favored<br>(54.44%)<br>General /<br>-77.4,-34.9    | Favored (96.3%)<br><i>mt</i><br>chi angles: 291.9,172.4           | 0.06Å               | -                   | -                  | -                   |
| A<br>182 | ILE            | 29.21         | -                      | Favored<br>(85.72%)<br>Ile or Val /<br>-57.8,-44.2 | Favored (70.5%)<br><i>mt</i><br>chi angles: 292.8,160.7           | 0.07Å               | -                   | -                  | -                   |
| A<br>183 | ASP            | 33.87         | -                      | Favored<br>(69.42%)<br>General /<br>-60.5,-30.0    | Favored (83.2%)<br><i>m-30</i><br>chi angles: 289.9,333.6         | 0.02Å               | -                   | -                  | -                   |
| A<br>184 | ASP            | 30.13         | -                      | Favored<br>(59.19%)<br>General / -86.6,-5.3        | Favored (73.1%)<br><i>m-30</i><br>chi angles: 296.4,316.2         | 0.02Å               | -                   | -                  | -                   |
| A<br>185 | HIS            | 30.54         | -                      | Favored<br>(18.9%)<br>General / 60.5,29.3          | Favored (65.7%)<br><i>m-70</i><br>chi angles: 302.1,265.3         | 0.04Å               | -                   | -                  | -                   |
| A<br>186 | PHE            | 26.33         | -                      | Favored<br>(29.31%)<br>General /<br>-102.8,-1.7    | Favored (20.9%)<br><i>m-10</i><br>chi angles: 291.3,345.6         | 0.04Å               | -                   | -                  | -                   |
| A<br>187 | LEU            | 24.96         | -                      | Favored<br>(31.48%)<br>General /<br>-94.5,139.2    | Favored (10.8%) <i>tp</i><br>chi angles: 189.5,76.8               | 0.03Å               | -                   | -                  | -                   |
| A<br>188 | PHE            | 23.45         | -                      | Favored<br>(26.75%)<br>General /                   | Favored (55.7%)<br><i>p90</i><br>chi angles: 65.3,270             | 0.06Å               | -                   | -                  | -                   |

|          |           |   |                                                                 |                                                                         |       |   |   |   |
|----------|-----------|---|-----------------------------------------------------------------|-------------------------------------------------------------------------|-------|---|---|---|
| A<br>189 | LYS 37.97 | - | -118.3,157.6<br>Favored<br>(4.74%)<br>General /<br>-122.3,178.9 | Favored (4.2%)<br><i>ptpp</i><br>chi angles:<br>66,171.2,89,56          | 0.01Å | - | - | - |
| A<br>190 | GLU 34.21 | - | Favored<br>(47.13%)<br>General /<br>-60.6,146.0                 | Favored (12.3%)<br><i>tt0</i><br>chi angles:<br>207.1,180.7,344.6       | 0.01Å | - | - | - |
| A<br>191 | GLY 28.29 | - | Favored<br>(46.17%)<br>Glycine /<br>-66.0,159.8                 | -                                                                       | -     | - | - | - |
| A<br>192 | ASP 25.23 | - | Favored<br>(2.21%)<br>General /<br>-78.2,-171.0                 | Favored (52%) <i>p0</i><br>chi angles: 62.9,14.7                        | 0.06Å | - | - | - |
| A<br>193 | ARG 30    | - | Favored<br>(66.66%)<br>General /<br>-67.0,-26.1                 | Favored (20.7%)<br><i>ptt90</i><br>chi angles:<br>67.1,193.3,159.3,91.3 | 0.03Å | - | - | - |
| A<br>194 | PHE 26.67 | - | Favored<br>(79.18%)<br>General /<br>-66.7,-45.3                 | Favored (93%)<br><i>m-80</i><br>chi angles: 296.7,282.4                 | 0.01Å | - | - | - |
| A<br>195 | LEU 26.12 | - | Favored<br>(73.32%)<br>General /<br>-70.8,-37.8                 | Favored (34.9%)<br><i>mt</i><br>chi angles: 292.8,185                   | 0.03Å | - | - | - |
| A<br>196 | GLN 26.98 | - | Favored<br>(78.94%)<br>General /<br>-60.7,-49.1                 | Favored (69.3%)<br><i>mm-40</i><br>chi angles:<br>297.8,286.9,330.1     | 0.03Å | - | - | - |
| A<br>197 | ALA 26.25 | - | Favored<br>(63.92%)<br>General /<br>-64.6,-17.4                 | -                                                                       | 0.07Å | - | - | - |
| A<br>198 | ALA 23.52 | - | Favored<br>(56.61%)<br>General / -86.8,-0.5                     | -                                                                       | 0.05Å | - | - | - |
| A<br>199 | ASN 28.07 | - | Favored<br>(17.66%)<br>General / 62.2,31.5                      | Favored (49.4%)<br><i>m-40</i><br>chi angles: 276.2,341.3               | 0.05Å | - | - | - |
| A<br>200 | ALA 24.5  | - | Favored<br>(47.43%)<br>General /<br>-88.8,-10.7                 | -                                                                       | 0.05Å | - | - | - |

# Alt Res High B Clash > 0.4Å Ramachandran Rotamer Cβ deviation Bond lengths Bond angles Cis Peptides

Avg: Clashscore: 34.13    Outliers: 0 of 340    Poor rotamers: 2 of 294    Outliers: 0 of 323    Outliers: 0 of 348    Outliers: 1 of 348    Non-Trans: 1 of 345



|          |           |   |                                                     |                                                                            |       |   |   |                           |
|----------|-----------|---|-----------------------------------------------------|----------------------------------------------------------------------------|-------|---|---|---------------------------|
| A<br>201 | CYS 29.26 | - | Favored<br>(13.98%)<br>General /<br>-116.9,20.2     | Favored (34.5%) <i>m</i><br>chi angles: 306                                | 0.04Å | - | - | -                         |
| A<br>202 | ARG 30    | - | Favored<br>(56.05%)<br>General /<br>-61.9,143.7     | Favored (36.9%)<br><i>mtt180</i><br>chi angles:<br>288.8,159.2,154.9,170.2 | 0.09Å | - | - | -                         |
| A<br>203 | TYR 33.41 | - | Favored<br>(17.66%)<br>General / 62.0,29.2          | Favored (3.7%)<br><i>m-80</i><br>chi angles: 322,291.8                     | 0.05Å | - | - | -                         |
| A<br>204 | TRP 27.82 | - | Favored<br>(96.01%)<br>Pre-Pro /<br>-62.5,136.8     | Favored (28.7%)<br><i>t-100</i><br>chi angles: 196.9,269                   | 0.04Å | - | - | -                         |
| A<br>205 | PRO 26.04 | - | Favored<br>(15.35%)<br>Cis-Pro /<br>-101.5,25.5     | Favored (49.5%)<br><i>Cg_endo</i><br>chi angles:<br>33.1,335.6,5.9         | 0.03Å | - | - | Cis PRO<br>omega=<br>2.36 |
| A<br>206 | THR 25.1  | - | Favored<br>(39.21%)<br>General /<br>-61.7,129.1     | Favored (96.5%) <i>m</i><br>chi angles: 300.8                              | 0.06Å | - | - | -                         |
| A<br>207 | GLY 25.57 | - | Favored<br>(83.49%)<br>Glycine / 80.3,-0.8          | -                                                                          | -     | - | - | -                         |
| A<br>208 | ARG 30    | - | Favored<br>(33.64%)<br>General /<br>-100.5,141.2    | Favored (5.5%)<br><i>mpt180</i><br>chi angles:<br>282.5,70.9,163,203       | 0.06Å | - | - | -                         |
| A<br>209 | GLY 23.13 | - | Favored<br>(42.38%)<br>Glycine /<br>-170.8,169.4    | -                                                                          | -     | - | - | -                         |
| A<br>210 | ILE 23.97 | - | Favored<br>(67.91%)<br>Ile or Val /<br>-128.0,133.1 | Favored (8%) <i>mt</i><br>chi angles: 297.7,148.3                          | 0.03Å | - | - | -                         |
| A<br>211 | TYR 26.64 | - | Favored<br>(49.78%)<br>General /<br>-122.3,143.2    | Favored (63.2%)<br><i>t80</i><br>chi angles: 181.9,272.1                   | 0.01Å | - | - | -                         |
| A<br>212 | HIS 26.91 | - | Favored<br>(26.7%)<br>General /<br>-153.3,148.4     | Favored (8%) <i>p90</i><br>chi angles: 77.1,72.5                           | 0.08Å | - | - | -                         |
| A<br>213 | ASN 26.3  | - | Favored<br>(21.82%)<br>General /<br>-82.8,162.1     | Favored (40.2%)<br><i>p0</i><br>chi angles: 69.8,341.2                     | 0.07Å | - | - | -                         |
| A<br>214 | ASP 30.75 | - | Favored<br>(73.74%)<br>General /<br>-58.5,-36.4     | Favored (81%)<br><i>m-30</i><br>chi angles: 295,332.6                      | 0.03Å | - | - | -                         |

| #                                                                                                                                                                       | Alt Res   | High B                                | Clash > 0.4Å | Ramachandran                                  | Rotamer                                                             | Cβ deviation | Bond lengths | Bond angles | Cis Peptides |
|-------------------------------------------------------------------------------------------------------------------------------------------------------------------------|-----------|---------------------------------------|--------------|-----------------------------------------------|---------------------------------------------------------------------|--------------|--------------|-------------|--------------|
| A 215                                                                                                                                                                   | ALA 25.9  | -                                     | -            | Favored (56.41%)<br>General / -70.7,-9.1      | -                                                                   | 0.02Å        | -            | -           | -            |
| A 216                                                                                                                                                                   | LYS 30.76 | -                                     | -            | Favored (29.74%)<br>General / 53.8,39.0       | Favored (93.4%)<br><i>mttt</i><br>chi angles: 297.1,176.8,182.2,172 | 0.05Å        | -            | -           | -            |
| A 217                                                                                                                                                                   | THR 24.04 | -                                     | -            | Favored (17.23%)<br>General / -114.4,11.4     | Favored (33.7%) <i>p</i><br>chi angles: 53.8                        | 0.04Å        | -            | -           | -            |
| A 218                                                                                                                                                                   | PHE 25.34 | -                                     | -            | Favored (12.75%)<br>General / -151.5,130.7    | Favored (82%) <i>t80</i><br>chi angles: 176.8,71.9                  | 0.03Å        | -            | -           | -            |
| A 219                                                                                                                                                                   | LEU 23.52 | -                                     | -            | Favored (29.48%)<br>General / -143.7,139.3    | Favored (2.5%) <i>tp</i><br>chi angles: 169.5,83.6                  | 0.02Å        | -            | -           | -            |
| A 220                                                                                                                                                                   | VAL 22.35 | 0.41Å<br>HA with A<br>229 ARG O       | -            | Favored (67.23%)<br>Ile or Val / -129.5,131.4 | Favored (58.3%) <i>t</i><br>chi angles: 180.2                       | 0.02Å        | -            | -           | -            |
| <p>Avg: Clashscore: 34.13    Outliers: 0 of 340    Poor rotamers: 2 of 294    Outliers: 0 of 323    Outliers: 0 of 348    Outliers: 1 of 348    Non-Trans: 1 of 345</p> |           |                                       |              |                                               |                                                                     |              |              |             |              |
| A 221                                                                                                                                                                   | TRP 23.44 | -                                     | -            | Favored (52.44%)<br>General / -104.6,127.8    | Favored (46.8%)<br><i>m-10</i><br>chi angles: 287.5,356.1           | 0.02Å        | -            | -           | -            |
| A 222                                                                                                                                                                   | VAL 20.89 | -                                     | -            | Favored (43.22%)<br>Ile or Val / -102.5,114.9 | Favored (36.6%) <i>t</i><br>chi angles: 184.2                       | 0.03Å        | -            | -           | -            |
| A 223                                                                                                                                                                   | ASN 21.25 | -                                     | -            | Favored (7.97%)<br>General / 65.6,34.2        | Favored (62%)<br><i>m-40</i><br>chi angles: 283.6,313.5             | 0.11Å        | -            | -           | -            |
| A 224                                                                                                                                                                   | GLU 25.14 | -                                     | -            | Favored (30.47%)<br>General / -78.7,-41.8     | Favored (9.4%)<br><i>tm-30</i><br>chi angles: 177.2,267,335.6       | 0.03Å        | -            | -           | -            |
| A 225                                                                                                                                                                   | GLU 27.26 | 0.41Å<br>HG3 with A<br>270 PHE<br>HD2 | -            | Allowed (0.24%)<br>General / -146.3,-53.1     | Favored (6.9%) <i>tt0</i><br>chi angles: 163.4,168.9,296.5          | 0.04Å        | -            | -           | -            |
| A 226                                                                                                                                                                   | ASP 21.9  | -                                     | -            | Favored (11.67%)<br>General / -97.2,166.2     | Favored (13.5%)<br><i>m-30</i><br>chi angles: 281.1,306.1           | 0.01Å        | -            | -           | -            |
| A 227                                                                                                                                                                   | HIS 21.52 | -                                     | -            | Favored (62.28%)<br>General /                 | Favored (53.8%)<br><i>m170</i><br>chi angles: 297.1,159.7           | 0.02Å        | -            | -           | -            |

|          |     |       |                                        |                                                                 |                                                                           |       |   |   |   |
|----------|-----|-------|----------------------------------------|-----------------------------------------------------------------|---------------------------------------------------------------------------|-------|---|---|---|
| A<br>228 | LEU | 23.53 | -                                      | -51.3,-48.7<br>Favored<br>(30.61%)<br>General /<br>-132.7,125.6 | Favored (95.7%)<br><i>mt</i><br>chi angles: 296.9,176                     | 0.08Å | - | - | - |
| A<br>229 | ARG | 30    | 0.41Å<br>O with A 220<br>VAL HA        | Favored<br>(45.28%)<br>General /<br>-111.3,121.5                | Favored (3.7%)<br><i>ttm-80</i><br>chi angles:<br>173.4,199.5,293.3,232.4 | 0.02Å | - | - | - |
| A<br>230 | ILE | 24.45 | -                                      | Favored<br>(59.06%)<br>Ile or Val /<br>-119.1,118.9             | Favored (17.6%)<br><i>mt</i><br>chi angles: 311.2,165.3                   | 0.06Å | - | - | - |
| A<br>231 | ILE | 27.58 | -                                      | Favored<br>(63.08%)<br>Ile or Val /<br>-124.1,135.6             | Allowed (1.8%) <i>mt</i><br>chi angles: 312.4,194.6                       | 0.04Å | - | - | - |
| A<br>232 | SER | 24.17 | -                                      | Favored<br>(54.46%)<br>General /<br>-118.5,135.3                | Favored (38.2%) <i>t</i><br>chi angles: 177.3                             | 0.01Å | - | - | - |
| A<br>233 | MET | 31.71 | -                                      | Favored<br>(26.48%)<br>General /<br>-162.6,164.8                | Allowed (0.3%)<br><i>pmt</i><br>chi angles:<br>68.7,292,176               | 0.03Å | - | - | - |
| A<br>234 | GLN | 29.75 | 0.59Å<br>HG2 with A<br>242 ILE<br>HD11 | Favored<br>(2.16%)<br>General /<br>-177.4,165.1                 | Favored (18.7%)<br><i>pt0</i><br>chi angles:<br>62.6,188.1,51.5           | 0.06Å | - | - | - |
| A<br>235 | LYS | 32.92 | -                                      | Favored<br>(49.96%)<br>General /<br>-67.8,149.3                 | Favored (4.4%)<br><i>mmtt</i><br>chi angles:<br>300.1,265.7,215.6,188.5   | 0.04Å | - | - | - |
| A<br>236 | GLY | 24.57 | -                                      | Favored<br>(27.68%)<br>Glycine /<br>89.5,-158.6                 | -                                                                         | -     | - | - | - |
| A<br>237 | GLY | 27.21 | -                                      | Favored<br>(4.21%)<br>Glycine /<br>-129.3,27.5                  | -                                                                         | -     | - | - | - |
| A<br>238 | ASP | 33.45 | -                                      | Favored<br>(7.01%)<br>General / -80.3,71.0                      | Favored (53%) <i>t0</i><br>chi angles: 187.5,0.9                          | 0.02Å | - | - | - |
| A<br>239 | LEU | 27.27 | -                                      | Favored<br>(66.8%)<br>General /<br>-57.9,-31.6                  | Favored (41.8%) <i>tp</i><br>chi angles: 185.4,62.7                       | 0.04Å | - | - | - |
| A<br>240 | LYS | 35.53 | -                                      | Favored<br>(17.83%)<br>General /<br>-62.8,-56.4                 | Favored (54.7%)<br><i>tttt</i><br>chi angles:<br>181.7,166.3,162.8,186.9  | 0.01Å | - | - | - |

# [Alt Res](#) [High B](#) [Clash > 0.4Å](#) [Ramachandran](#) [Rotamer](#) [Cβ deviation](#) [Bond lengths](#) [Bond angles](#) [Cis Peptides](#)

|          |           | Avg: Clashscore:<br>34.13              | 2.93 | Outliers: 0 of<br>340                              | Poor rotamers: 2 of<br>294                                                 | Outliers: 0 of 323 | Outliers: 0 of 348 | Outliers: 1 of<br>348 | Non-<br>Trans: 1<br>of 345 |
|----------|-----------|----------------------------------------|------|----------------------------------------------------|----------------------------------------------------------------------------|--------------------|--------------------|-----------------------|----------------------------|
| A<br>241 | THR 29.42 | -                                      |      | Favored<br>(75.1%)<br>General /<br>-57.9,-38.1     | Favored (44.6%) <i>m</i><br>chi angles: 304.6                              | 0.05Å              | -                  | -                     | -                          |
| A<br>242 | ILE 24.55 | 0.59Å<br>HD11 with A<br>234 GLN<br>HG2 |      | Favored<br>(70.6%)<br>Ile or Val /<br>-67.3,-49.6  | Favored (71%) <i>mt</i><br>chi angles: 289.8,163.1                         | 0.07Å              | -                  | -                     | -                          |
| A<br>243 | PHE 24.46 | -                                      |      | Favored<br>(90.13%)<br>General /<br>-65.4,-38.5    | Favored (7.7%) <i>t80</i><br>chi angles: 186.3,34.8                        | 0.06Å              | -                  | -                     | -                          |
| A<br>244 | GLN 32.81 | -                                      |      | Favored<br>(75.65%)<br>General /<br>-67.7,-33.8    | Favored (51.5%)<br><i>tp40</i><br>chi angles:<br>181.9,56.6,70.2           | 0.01Å              | -                  | -                     | -                          |
| A<br>245 | ARG 30    | -                                      |      | Favored<br>(92.9%)<br>General /<br>-62.5,-45.5     | Favored (15.4%)<br><i>ttp-110</i><br>chi angles:<br>186.9,159.3,49.1,235.9 | 0.03Å              | -                  | -                     | -                          |
| A<br>246 | LEU 27.25 | -                                      |      | Favored<br>(85.88%)<br>General /<br>-58.9,-47.1    | Favored (45.5%) <i>tp</i><br>chi angles: 184.4,63.4                        | 0.03Å              | -                  | -                     | -                          |
| A<br>247 | VAL 30    | -                                      |      | Favored<br>(85.7%)<br>Ile or Val /<br>-63.1,-48.9  | Favored (70.3%) <i>t</i><br>chi angles: 172.1                              | 0.05Å              | -                  | -                     | -                          |
| A<br>248 | ASN 32.67 | -                                      |      | Favored<br>(61.43%)<br>General /<br>-51.1,-44.9    | Favored (92.8%)<br><i>m-40</i><br>chi angles: 290.7,346.2                  | 0.04Å              | -                  | -                     | -                          |
| A<br>249 | ALA 27.17 | -                                      |      | Favored<br>(63.41%)<br>General /<br>-66.4,-50.4    | -                                                                          | 0.01Å              | -                  | -                     | -                          |
| A<br>250 | VAL 26.35 | -                                      |      | Favored<br>(92.26%)<br>Ile or Val /<br>-59.0,-44.8 | Favored (89.3%) <i>t</i><br>chi angles: 174.1                              | 0.08Å              | -                  | -                     | -                          |
| A<br>251 | ASN 32.2  | -                                      |      | Favored<br>(94.1%)<br>General /<br>-60.4,-41.6     | Favored (82.5%)<br><i>m-40</i><br>chi angles: 283.1,345.1                  | 0.02Å              | -                  | -                     | -                          |
| A<br>252 | THR 31.5  | -                                      |      | Favored<br>(90.56%)<br>General /<br>-60.9,-46.5    | Favored (99.3%) <i>m</i><br>chi angles: 300.3                              | 0.08Å              | -                  | -                     | -                          |
| A<br>253 | ILE 25.98 | -                                      |      | Favored<br>(87.47%)<br>Ile or Val /<br>-61.2,-48.8 | Favored (31.2%)<br><i>mt</i><br>chi angles: 290,155.5                      | 0.08Å              | -                  | -                     | -                          |

|          |                |               |                                   |                                                   |                                                                            |                     |                     |                    |                     |
|----------|----------------|---------------|-----------------------------------|---------------------------------------------------|----------------------------------------------------------------------------|---------------------|---------------------|--------------------|---------------------|
| A<br>254 | GLU            | 28.7          | -                                 | Favored<br>(70.48%)<br>General /<br>-58.1,-34.7   | Favored (57.1%)<br><i>tt0</i><br>chi angles:<br>186.4,180.4,27.9           | 0.03Å               | -                   | -                  | -                   |
| A<br>255 | SER            | 32            | -                                 | Favored<br>(61.92%)<br>General /<br>-58.4,-25.4   | Favored (8.3%) <i>p</i><br>chi angles: 83.2                                | 0.02Å               | -                   | -                  | -                   |
| A<br>256 | LYS            | 36.72         | 0.40Å<br>HA with A<br>256 LYS HD3 | Favored<br>(9.18%)<br>General /<br>-106.3,-30.4   | Favored (6.3%)<br><i>mmtp</i><br>chi angles:<br>295.8,311.5,154.3,67.3     | 0.03Å               | -                   | -                  | -                   |
| A<br>257 | LEU            | 30.57         | -                                 | Favored<br>(15.88%)<br>Pre-Pro /<br>-131.8,116.4  | Allowed (1.1%) <i>mt</i><br>chi angles: 273.3,200.2                        | 0.01Å               | -                   | -                  | -                   |
| A<br>258 | PRO            | 29.7          | -                                 | Favored<br>(49.32%)<br>Trans-Pro /<br>-72.5,149.0 | Allowed (1.1%)<br><i>Cg_exo</i><br>chi angles:<br>359.2,15.4,336.5         | 0.03Å               | -                   | -                  | -                   |
| A<br>259 | PHE            | 25.7          | -                                 | Favored<br>(15.06%)<br>General /<br>-94.1,159.7   | Favored (23.2%)<br><i>m-10</i><br>chi angles: 301.2,321                    | 0.04Å               | -                   | -                  | -                   |
| A<br>260 | SER            | 25.64         | -                                 | Favored<br>(31.13%)<br>General /<br>-89.7,120.6   | Favored (6.6%) <i>t</i><br>chi angles: 163.6                               | 0.02Å               | -                   | -                  | -                   |
| <b>#</b> | <b>Alt Res</b> | <b>High B</b> | <b>Clash &gt; 0.4Å</b>            | <b>Ramachandran</b>                               | <b>Rotamer</b>                                                             | <b>Cβ deviation</b> | <b>Bond lengths</b> | <b>Bond angles</b> | <b>Cis Peptides</b> |
|          |                | Avg: 34.13    | Clashscore: 2.93                  | Outliers: 0 of 340                                | Poor rotamers: 2 of 294                                                    | Outliers: 0 of 323  | Outliers: 0 of 348  | Outliers: 1 of 348 | Non-Trans: 1 of 345 |
| A<br>261 | ARG            | 30            | -                                 | Favored<br>(34.46%)<br>General /<br>-140.9,140.6  | Favored (35.3%)<br><i>ttt-90</i><br>chi angles:<br>202.4,185.9,184.5,280.8 | 0.02Å               | -                   | -                  | -                   |
| A<br>262 | ASP            | 27.58         | -                                 | Favored<br>(49.43%)<br>General /<br>-114.1,139.3  | Favored (27.4%)<br><i>t70</i><br>chi angles: 179,78.5                      | 0.02Å               | -                   | -                  | -                   |
| A<br>263 | ASP            | 33.48         | -                                 | Favored<br>(77.67%)<br>General /<br>-63.7,-34.4   | Favored (85.3%)<br><i>m-30</i><br>chi angles: 283.5,345                    | 0.02Å               | -                   | -                  | -                   |
| A<br>264 | ARG            | 30            | -                                 | Favored<br>(22.39%)<br>General /<br>-81.4,-41.1   | Favored (4.2%)<br><i>ttp80</i><br>chi angles:<br>190.5,173.2,102.4,70.5    | 0.04Å               | -                   | -                  | -                   |
| A<br>265 | LEU            | 23.83         | -                                 | Favored<br>(21.51%)<br>General /<br>-101.9,-8.5   | Favored (78.7%)<br><i>mt</i><br>chi angles: 300.1,180.5                    | 0.04Å               | -                   | -                  | -                   |

|          |           |                                       |                                                    |                                                                   |       |   |   |   |
|----------|-----------|---------------------------------------|----------------------------------------------------|-------------------------------------------------------------------|-------|---|---|---|
| A<br>266 | GLY 21.77 | -                                     | Favored<br>(39.17%)<br>Glycine /<br>73.6,-147.7    | -                                                                 | -     | - | - | - |
| A<br>267 | PHE 23.94 | -                                     | Favored<br>(28.66%)<br>General /<br>-66.9,126.3    | Favored (51.2%)<br><i>m-80</i><br>chi angles: 287.1,292.4         | 0.03Å | - | - | - |
| A<br>268 | LEU 24.63 | -                                     | Favored<br>(33.67%)<br>General /<br>-88.2,134.9    | Favored (70.1%)<br><i>mt</i><br>chi angles: 300.2,182.8           | 0.04Å | - | - | - |
| A<br>269 | THR 23.15 | -                                     | Favored<br>(40.5%)<br>General /<br>-133.9,159.5    | Favored (17.5%) <i>p</i><br>chi angles: 49.3                      | 0.04Å | - | - | - |
| A<br>270 | PHE 22.61 | 0.41Å<br>HD2 with A<br>225 GLU<br>HG3 | Favored<br>(96.39%)<br>General /<br>-64.5,-41.4    | Favored (25%) <i>t80</i><br>chi angles: 163.9,67.4                | 0.12Å | - | - | - |
| A<br>271 | CYS 25.73 | 0.63Å<br>SG with B 1<br>ARG NE        | Favored<br>(20.54%)<br>Pre-Pro /<br>-99.3,136.2    | Favored (46.4%) <i>t</i><br>chi angles: 185.1                     | 0.06Å | - | - | - |
| A<br>272 | PRO 22.46 | -                                     | Favored<br>(44.35%)<br>Trans-Pro /<br>-62.9,-15.0  | Favored (10%)<br><i>Cg_endo</i><br>chi angles:<br>15.2,335.6,23.1 | 0.02Å | - | - | - |
| A<br>273 | THR 23.59 | -                                     | Favored<br>(61.79%)<br>General /<br>-72.3,-18.5    | Favored (57.9%) <i>p</i><br>chi angles: 64.5                      | 0.05Å | - | - | - |
| A<br>274 | ASN 24.83 | -                                     | Favored<br>(19.43%)<br>General /<br>-103.0,19.5    | Favored (35.3%)<br><i>m110</i><br>chi angles: 294.9,127.9         | 0.03Å | - | - | - |
| A<br>275 | LEU 23.62 | -                                     | Favored<br>(3.31%)<br>General /<br>-76.8,-175.1    | Favored (65.3%)<br><i>mt</i><br>chi angles: 287.1,173.1           | 0.06Å | - | - | - |
| A<br>276 | GLY 22.37 | -                                     | Favored<br>(3.52%)<br>Glycine /<br>71.4,-111.1     | -                                                                 | -     | - | - | - |
| A<br>277 | THR 22.25 | -                                     | Favored<br>(60.75%)<br>General /<br>-74.5,-27.8    | Favored (36%) <i>p</i><br>chi angles: 68.5                        | 0.05Å | - | - | - |
| A<br>278 | THR 23.74 | -                                     | Allowed (1.5%)<br>General / 65.5,0.8               | Favored (2.8%) <i>p</i><br>chi angles: 80.7                       | 0.07Å | - | - | - |
| A<br>279 | ILE 24.06 | -                                     | Favored<br>(33.35%)<br>Ile or Val /<br>-76.8,132.2 | Allowed (1.4%)<br><i>mm</i><br>chi angles: 295.8,272.2            | 0.04Å | - | - | - |

| #        | Alt | Res   | High<br>B        | Clash ><br>0.4Å                       | Ramachandran                                        | Rotamer                                                                    | Cβ<br>deviation | Bond<br>lengths | Bond angles     | Cis<br>Peptides |
|----------|-----|-------|------------------|---------------------------------------|-----------------------------------------------------|----------------------------------------------------------------------------|-----------------|-----------------|-----------------|-----------------|
| A<br>280 | ARG | 30    |                  | 0.41Å<br>NH2 with A<br>324 ASP<br>OD2 | Favored<br>(5.93%)<br>General /<br>-128.7,101.0     | Favored (46.1%)<br><i>ttt-90</i><br>chi angles:<br>177.6,185.8,194.8,284.3 | 0.03Å           | -               | -               | -               |
|          |     |       | Avg: Clashscore: | Outliers: 0 of                        | Poor rotamers: 2 of                                 | Outliers: 0 of                                                             | Outliers: 0 of  | Outliers: 1 of  | Non-Trans: 1 of |                 |
|          |     |       | 34.13            | 2.93                                  | 340                                                 | 294                                                                        | 323             | 348             | 348             | 345             |
| A<br>281 | ALA | 22.44 | -                |                                       | Favored<br>(48.35%)<br>General /<br>-101.6,127.5    | -                                                                          | 0.03Å           | -               | -               | -               |
| A<br>282 | SER | 24.79 | -                |                                       | Favored<br>(43.03%)<br>General /<br>-149.4,160.9    | Favored (75.5%) <i>p</i><br>chi angles: 71.2                               | 0.03Å           | -               | -               | -               |
| A<br>283 | VAL | 27.26 | -                |                                       | Favored<br>(28.51%)<br>Ile or Val /<br>-124.1,147.4 | Favored (17.4%) <i>m</i><br>chi angles: 293.2                              | 0.01Å           | -               | -               | -               |
| A<br>284 | HIS | 30    | -                |                                       | Favored<br>(30.32%)<br>General /<br>-92.2,117.9     | Favored (54.5%)<br><i>m170</i><br>chi angles: 297,171.3                    | 0.06Å           | -               | -               | -               |
| A<br>285 | ILE | 29.68 | -                |                                       | Favored<br>(25.52%)<br>Ile or Val /<br>-143.2,142.6 | Favored (6.2%) <i>tt</i><br>chi angles: 190.9,179.2                        | 0.04Å           | -               | -               | -               |
| A<br>286 | ALA | 31.69 | -                |                                       | Favored<br>(49.97%)<br>General /<br>-111.1,123.3    | -                                                                          | 0.02Å           | -               | -               | -               |
| A<br>287 | LEU | 35.22 | -                |                                       | Favored<br>(66.14%)<br>Pre-Pro /<br>-124.9,76.9     | Favored (55.8%)<br><i>mt</i><br>chi angles: 302.9,171.9                    | 0.05Å           | -               | -               | -               |
| A<br>288 | PRO | 37.7  | -                |                                       | Favored<br>(26.3%)<br>Trans-Pro /<br>-56.0,-47.1    | Favored (27.3%)<br><i>Cg_exo</i><br>chi angles:<br>340.4,30.5,331.4        | 0.01Å           | -               | -               | -               |
| A<br>289 | LYS | 41.58 | -                |                                       | Favored<br>(28.64%)<br>General /<br>-63.9,-54.8     | Favored (2.2%)<br><i>mttm</i><br>chi angles:<br>300.6,212.4,215.9,317.3    | 0.04Å           | -               | -               | -               |
| A<br>290 | LEU | 41.93 | -                |                                       | Favored<br>(69.97%)<br>General /<br>-63.4,-28.4     | Favored (11.4%)<br><i>mt</i><br>chi angles: 302.9,194.1                    | 0.03Å           | -               | -               | -               |
| A<br>291 | ALA | 45.19 | C with A 293     | 0.42Å<br>ASP H                        | Favored<br>(58.14%)<br>General / -84.9,-9.4         | -                                                                          | 0.01Å           | -               | -               | -               |
| A<br>292 | LYS | 47.44 | -                |                                       | Allowed<br>(0.11%)                                  | Allowed (0.9%)<br><i>tttp</i>                                              | 0.02Å           | -               | -               | -               |

| #                                                                                                                                                                                        | Alt Res   | High B                           | Clash > 0.4Å | Ramachandran                                                     | Rotamer                                                              | Cβ deviation | Bond lengths | Bond angles | Cis Peptides |
|------------------------------------------------------------------------------------------------------------------------------------------------------------------------------------------|-----------|----------------------------------|--------------|------------------------------------------------------------------|----------------------------------------------------------------------|--------------|--------------|-------------|--------------|
| A 293                                                                                                                                                                                    | ASP 51.65 | 0.42Å<br>H with A 291<br>ALA C   | -            | General / -73.3,18.5<br>Allowed (0.27%)<br>General / -161.3,65.0 | Favored (42.4%) <i>t0</i><br>chi angles: 190.9,359.6                 | 0.03Å        | -            | -           | -            |
| A 294                                                                                                                                                                                    | LYS 50.31 | -                                | -            | Favored (29.09%)<br>General / -52.8,-29.7                        | Allowed (0.7%)<br><i>tptt</i><br>chi angles: 165.5,105.1,140.9,152.5 | 0.04Å        | -            | -           | -            |
| A 295                                                                                                                                                                                    | LYS 73.29 | -                                | -            | Favored (76.94%)<br>General / -66.0,-33.9                        | Allowed (0.3%)<br><i>mptt</i><br>chi angles: 258.9,31.5,186.1,145.3  | 0.03Å        | -            | -           | -            |
| A 296                                                                                                                                                                                    | GLN 52.52 | -                                | -            | Favored (27.39%)<br>General / -83.1,-31.3                        | Favored (23.4%)<br><i>tp40</i><br>chi angles: 206.7,63.3,42.4        | 0.02Å        | -            | -           | -            |
| A 297                                                                                                                                                                                    | LEU 45.05 | -                                | -            | Favored (74.92%)<br>General / -59.2,-50.2                        | Favored (17.8%) <i>tp</i><br>chi angles: 172.4,72.2                  | 0.01Å        | -            | -           | -            |
| A 298                                                                                                                                                                                    | GLU 44.64 | -                                | -            | Favored (85.02%)<br>General / -61.8,-37.6                        | OUTLIER (0.3%)<br>chi angles: 277.4,249.3,147.1                      | 0.01Å        | -            | -           | -            |
| A 299                                                                                                                                                                                    | ALA 45.13 | 0.46Å<br>O with A 303<br>LYS HG3 | -            | Favored (95.23%)<br>General / -63.4,-39.7                        | -                                                                    | 0.02Å        | -            | -           | -            |
| A 300                                                                                                                                                                                    | ILE 44.14 | -                                | -            | Favored (32.81%)<br>Ile or Val / -67.4,-53.4                     | Favored (49.4%)<br><i>mt</i><br>chi angles: 290.9,158.2              | 0.04Å        | -            | -           | -            |
| <p>Avg: Clashscore: 34.13    Clashes: 2.93    Outliers: 0 of 340    Poor rotamers: 2 of 294    Outliers: 0 of 323    Outliers: 0 of 348    Outliers: 1 of 348    Non-Trans: 1 of 345</p> |           |                                  |              |                                                                  |                                                                      |              |              |             |              |
| A 301                                                                                                                                                                                    | ALA 37.48 | -                                | -            | Favored (56.55%)<br>General / -50.5,-46.0                        | -                                                                    | 0.04Å        | -            | -           | -            |
| A 302                                                                                                                                                                                    | ALA 36.31 | -                                | -            | Favored (64.15%)<br>General / -56.7,-31.2                        | -                                                                    | 0.03Å        | -            | -           | -            |
| A 303                                                                                                                                                                                    | LYS 47.65 | 0.46Å<br>HG3 with A 299<br>ALA O | -            | Favored (65.59%)<br>General / -72.4,-31.6                        | Favored (3.9%)<br><i>mttm</i><br>chi angles: 316.4,149.9,186.9,281.8 | 0.03Å        | -            | -           | -            |
| A 304                                                                                                                                                                                    | PHE 33.45 | -                                | -            | Favored (16.21%)<br>General / -90.6,13.4                         | Favored (62.9%)<br><i>m-80</i><br>chi angles: 298.9,294.8            | 0.03Å        | -            | -           | -            |



|          |           |                                       |                                                     |                                                                       |       |   |                                            |   |
|----------|-----------|---------------------------------------|-----------------------------------------------------|-----------------------------------------------------------------------|-------|---|--------------------------------------------|---|
| A<br>305 | ASN 29.19 | -                                     | Favored<br>(5.85%)<br>General / 65.5,37.8           | Favored (77.8%)<br><i>m-40</i><br>chi angles: 282.1,335.4             | 0.05Å | - | -                                          | - |
| A<br>306 | LEU 29.42 | -                                     | Favored<br>(25.98%)<br>General /<br>-114.0,155.4    | Favored (30.7%)<br><i>mt</i><br>chi angles: 298.9,188                 | 0.01Å | - | -                                          | - |
| A<br>307 | GLN 35.8  | -                                     | Favored<br>(53.67%)<br>General /<br>-122.7,131.2    | OUTLIER (0.2%)<br>chi angles:<br>98.8,153.3,63.3                      | 0.04Å | - | OUTLIER(S)<br>worst is CA-<br>CB-CG: 4.1 σ | - |
| A<br>308 | VAL 35.01 | -                                     | Favored<br>(32.51%)<br>Ile or Val /<br>-99.6,136.0  | Favored (14.5%) <i>t</i><br>chi angles: 188.3                         | 0.02Å | - | -                                          | - |
| A<br>309 | ALA 34.51 | -                                     | Favored<br>(3.17%)<br>General /<br>-143.7,-169.8    | -                                                                     | 0.03Å | - | -                                          | - |
| A<br>310 | GLY 42.64 | 0.73Å<br>O with S 334<br>HOH O        | -                                                   | -                                                                     | -     | - | -                                          | - |
| A<br>321 | GLY 35.67 | -                                     | -                                                   | -                                                                     | -     | - | -                                          | - |
| A<br>322 | VAL 34.53 | -                                     | Favored<br>(35.82%)<br>Ile or Val /<br>-86.8,120.2  | Favored (63.2%) <i>t</i><br>chi angles: 171.2                         | 0.03Å | - | -                                          | - |
| A<br>323 | TYR 41.45 | -                                     | Favored<br>(17.9%)<br>General /<br>-107.8,157.7     | Favored (68.1%)<br><i>m-80</i><br>chi angles: 286.8,278               | 0.02Å | - | -                                          | - |
| A<br>324 | ASP 30.02 | 0.41Å<br>OD2 with A<br>280 ARG<br>NH2 | Favored<br>(25.13%)<br>General /<br>-98.4,113.2     | Favored (21.6%)<br><i>t70</i><br>chi angles: 189,82.7                 | 0.06Å | - | -                                          | - |
| A<br>325 | ILE 27.22 | -                                     | Favored<br>(68.18%)<br>Ile or Val /<br>-111.0,127.3 | Favored (6.6%) <i>mt</i><br>chi angles: 306.5,190.6                   | 0.04Å | - | -                                          | - |
| A<br>326 | SER 27.34 | -                                     | Favored<br>(38.86%)<br>General /<br>-139.4,160.9    | Favored (72.4%) <i>p</i><br>chi angles: 59.3                          | 0.04Å | - | -                                          | - |
| A<br>327 | ASN 23.44 | -                                     | Favored<br>(35.26%)<br>General /<br>-65.7,128.3     | Favored (10.2%)<br><i>p0</i><br>chi angles: 64.6,287.6                | 0.01Å | - | -                                          | - |
| A<br>328 | LYS 33.24 | -                                     | Favored<br>(44.58%)<br>General /<br>-78.8,-28.1     | Allowed (0.8%)<br><i>tmtt</i><br>chi angles:<br>222.8,285.7,169.5,187 | 0.01Å | - | -                                          | - |
| A<br>329 | ARG 30    | -                                     | Favored<br>(33.65%)<br>General /                    | Favored (74.9%)<br><i>mtp180</i><br>chi angles:                       | 0.03Å | - | -                                          | - |

| #     | Alt Res   | High B                 | Clash > 0.4Å     | Ramachandran                                 | Rotamer                                                                 | Cβ deviation       | Bond lengths       | Bond angles        | Cis Peptides        |
|-------|-----------|------------------------|------------------|----------------------------------------------|-------------------------------------------------------------------------|--------------------|--------------------|--------------------|---------------------|
| A 330 | ARG 30    | -                      | -                | Favored (3.94%)<br>General / -116.7,-36.4    | Favored (44.1%)<br><i>mmt-90</i><br>chi angles: 307.9,273.6,188.4,271.1 | 0.07Å              | -                  | -                  | -                   |
|       |           | Avg: Clashscore: 34.13 | Clashscore: 2.93 | Outliers: 0 of 340                           | Poor rotamers: 2 of 294                                                 | Outliers: 0 of 323 | Outliers: 0 of 348 | Outliers: 1 of 348 | Non-Trans: 1 of 345 |
| A 331 | MET 24.79 | -                      | -                | Favored (33.05%)<br>General / -113.3,150.1   | Favored (81%) <i>mtp</i><br>chi angles: 300.6,184.6,76.1                | 0.03Å              | -                  | -                  | -                   |
| A 332 | GLY 24.01 | -                      | -                | Favored (73.68%)<br>Glycine / 90.8,1.2       | -                                                                       | -                  | -                  | -                  | -                   |
| A 333 | LEU 23.79 | -                      | -                | Favored (46.11%)<br>General / -140.7,156.8   | Favored (2.1%) <i>pt</i><br>chi angles: 76.1,175.1                      | 0.01Å              | -                  | -                  | -                   |
| A 334 | THR 22.95 | -                      | -                | Favored (17.39%)<br>General / -81.5,169.3    | Favored (62.5%) <i>p</i><br>chi angles: 63.6                            | 0.06Å              | -                  | -                  | -                   |
| A 335 | GLU 23.85 | -                      | -                | Favored (86.47%)<br>General / -58.5,-46.5    | Favored (59.9%)<br><i>mp0</i><br>chi angles: 290.6,79.7,358.4           | 0.01Å              | -                  | -                  | -                   |
| A 336 | TYR 27.1  | -                      | -                | Favored (14.84%)<br>General / -51.6,-56.2    | Favored (86.9%)<br><i>t80</i><br>chi angles: 180.4,82                   | 0.02Å              | -                  | -                  | -                   |
| A 337 | GLN 27.66 | -                      | -                | Favored (75.11%)<br>General / -58.5,-37.2    | Favored (85%) <i>mt0</i><br>chi angles: 286.8,165.7,334.7               | 0.04Å              | -                  | -                  | -                   |
| A 338 | ALA 22.17 | -                      | -                | Favored (71.1%)<br>General / -64.2,-49.7     | -                                                                       | 0.03Å              | -                  | -                  | -                   |
| A 339 | VAL 23.16 | -                      | -                | Favored (91.11%)<br>Ile or Val / -63.2,-41.0 | Favored (70%) <i>t</i><br>chi angles: 172.1                             | 0.05Å              | -                  | -                  | -                   |
| A 340 | LYS 32.17 | -                      | -                | Favored (70.52%)<br>General / -65.7,-29.9    | Favored (12.3%)<br><i>tptp</i><br>chi angles: 175.2,65.7,152.8,46.5     | 0.03Å              | -                  | -                  | -                   |
| A 341 | GLU 30.3  | -                      | -                | Favored (70.69%)<br>General / -69.1,-45.3    | Allowed (0.7%) <i>tt0</i><br>chi angles: 230.9,164.9,60.7               | 0.04Å              | -                  | -                  | -                   |

|          |           |   |                                                    |                                                                     |       |   |   |   |
|----------|-----------|---|----------------------------------------------------|---------------------------------------------------------------------|-------|---|---|---|
| A<br>342 | MET 24.33 | - | Favored<br>(73.11%)<br>General /<br>-56.4,-49.9    | Favored (20.2%)<br><i>tmm</i><br>chi angles:<br>187.9,271.8,282.8   | 0.03Å | - | - | - |
| A<br>343 | GLN 28.93 | - | Favored<br>(74.29%)<br>General /<br>-57.8,-50.1    | Favored (9.9%) <i>tt0</i><br>chi angles:<br>168.1,195.5,283.8       | 0.04Å | - | - | - |
| A<br>344 | ASP 27.75 | - | Favored<br>(87.65%)<br>General /<br>-66.9,-39.7    | Favored (87.3%)<br><i>m-30</i><br>chi angles: 291.7,350.6           | 0.04Å | - | - | - |
| A<br>345 | GLY 25.78 | - | Favored<br>(97.97%)<br>Glycine /<br>-62.7,-44.1    | -                                                                   | -     | - | - | - |
| A<br>346 | ILE 24.96 | - | Favored<br>(86.6%)<br>Ile or Val /<br>-67.8,-43.2  | Favored (24.9%)<br><i>mm</i><br>chi angles: 295.1,305.4             | 0.07Å | - | - | - |
| A<br>347 | LEU 28.61 | - | Favored<br>(70.2%)<br>General /<br>-54.2,-42.9     | Favored (73.5%)<br><i>mt</i><br>chi angles: 287.4,170.4             | 0.02Å | - | - | - |
| A<br>348 | GLU 30.82 | - | Favored<br>(75.99%)<br>General /<br>-69.2,-42.4    | Favored (79.6%)<br><i>mm-30</i><br>chi angles:<br>291.1,296.8,129.1 | 0.02Å | - | - | - |
| A<br>349 | MET 32.34 | - | Favored<br>(77.49%)<br>General /<br>-63.9,-34.2    | Favored (73.7%)<br><i>mtp</i><br>chi angles:<br>299.1,186.2,66.1    | 0.04Å | - | - | - |
| A<br>350 | ILE 26.48 | - | Favored<br>(81.85%)<br>Ile or Val /<br>-68.9,-41.0 | Favored (29%) <i>mt</i><br>chi angles: 283.4,169.3                  | 0.06Å | - | - | - |

# Alt Res High B Clash > 0.4Å Ramachandran Rotamer Cβ deviation Bond lengths Bond angles Cis Peptides

Avg: Clashscore: 34.13    Clashes: 2.93    Outliers: 0 of 340    Poor rotamers: 2 of 294    Outliers: 0 of 323    Outliers: 0 of 348    Outliers: 1 of 348    Non-Trans: 1 of 345

|          |           |   |                                                 |                                                                          |       |   |   |   |
|----------|-----------|---|-------------------------------------------------|--------------------------------------------------------------------------|-------|---|---|---|
| A<br>351 | LYS 27.76 | - | Favored<br>(73.53%)<br>General /<br>-54.8,-44.1 | Favored (86.5%)<br><i>mttt</i><br>chi angles:<br>288.2,183.3,187.6,171.9 | 0.03Å | - | - | - |
| A<br>352 | MET 34.59 | - | Favored<br>(84.92%)<br>General /<br>-65.4,-45.2 | Favored (85%) <i>mtp</i><br>chi angles:<br>295.9,176.1,62.3              | 0.02Å | - | - | - |
| A<br>353 | GLU 38.05 | - | Favored<br>(98.67%)<br>General /<br>-62.4,-41.4 | Favored (43.3%)<br><i>tp30</i><br>chi angles:<br>177.1,74.3,203.4        | 0.04Å | - | - | - |

|          |           |                                  |                                                 |                                                                          |       |   |   |   |
|----------|-----------|----------------------------------|-------------------------------------------------|--------------------------------------------------------------------------|-------|---|---|---|
| A<br>354 | GLU 34.72 | -                                | Favored<br>(63.27%)<br>General /<br>-70.1,-24.9 | Allowed (0.8%)<br><i>tp30</i><br>chi angles:<br>203,88.6,94.7            | 0.02Å | - | - | - |
| A<br>355 | ALA 36.54 | -                                | Favored<br>(27.33%)<br>General /<br>-95.9,-11.0 | -                                                                        | 0.01Å | - | - | - |
| A<br>356 | ALA 39.12 | -                                | Favored<br>(89.43%)<br>Pre-Pro /<br>-73.1,156.4 | -                                                                        | 0.01Å | - | - | - |
| A<br>357 | PRO 42.77 | -                                | -                                               | Favored (40.7%)<br><i>Cg_endo</i><br>chi angles:<br>23.5,327,28.5        | 0.02Å | - | - | - |
| B 1      | ARG 29.32 | 0.63Å<br>NE with A<br>271 CYS SG | -                                               | Favored (2.5%)<br><i>ptp-110</i><br>chi angles:<br>87.2,189.6,51.1,230.9 | 0.05Å | - | - | - |
| D 3      | NA 38.65  | -                                | -                                               | -                                                                        | -     | - | - | - |
| D 5      | NA 48.85  | -                                | -                                               | -                                                                        | -     | - | - | - |
| S 1      | HOH 23.41 | -                                | -                                               | -                                                                        | -     | - | - | - |
| S 2      | HOH 23.54 | -                                | -                                               | -                                                                        | -     | - | - | - |
| S 3      | HOH 27.26 | -                                | -                                               | -                                                                        | -     | - | - | - |
| S 4      | HOH 26.02 | -                                | -                                               | -                                                                        | -     | - | - | - |
| S 5      | HOH 25.17 | -                                | -                                               | -                                                                        | -     | - | - | - |
| S 6      | HOH 23.45 | -                                | -                                               | -                                                                        | -     | - | - | - |
| S 7      | HOH 19.68 | -                                | -                                               | -                                                                        | -     | - | - | - |
| S 8      | HOH 22.08 | -                                | -                                               | -                                                                        | -     | - | - | - |
| S 9      | HOH 25.07 | -                                | -                                               | -                                                                        | -     | - | - | - |
| S<br>10  | HOH 20.82 | -                                | -                                               | -                                                                        | -     | - | - | - |

# Alt Res High B Clash > 0.4Å Ramachandran Rotamer Cβ deviation Bond lengths Bond angles Cis Peptides

Avg: Clashscore: 34.13    Outliers: 0 of 340    Poor rotamers: 2 of 294    Outliers: 0 of 323    Outliers: 0 of 348    Outliers: 1 of 348    Non-Trans: 1 of 345

|         |           |   |   |   |   |   |   |   |
|---------|-----------|---|---|---|---|---|---|---|
| S<br>11 | HOH 22.54 | - | - | - | - | - | - | - |
| S<br>12 | HOH 30.7  | - | - | - | - | - | - | - |
| S<br>13 | HOH 27.36 | - | - | - | - | - | - | - |
| S<br>14 | HOH 23.39 | - | - | - | - | - | - | - |
| S<br>15 | HOH 27.81 | - | - | - | - | - | - | - |

|   |    |     |       |   |   |   |   |   |   |   |
|---|----|-----|-------|---|---|---|---|---|---|---|
| S | 16 | HOH | 30.4  | - | - | - | - | - | - | - |
| S | 17 | HOH | 28.57 | - | - | - | - | - | - | - |
| S | 18 | HOH | 25.55 | - | - | - | - | - | - | - |
| S | 19 | HOH | 25.28 | - | - | - | - | - | - | - |
| S | 20 | HOH | 28.12 | - | - | - | - | - | - | - |
| S | 21 | HOH | 23.54 | - | - | - | - | - | - | - |
| S | 22 | HOH | 25.01 | - | - | - | - | - | - | - |
| S | 23 | HOH | 30.2  | - | - | - | - | - | - | - |
| S | 24 | HOH | 33.57 | - | - | - | - | - | - | - |
| S | 25 | HOH | 28.38 | - | - | - | - | - | - | - |
| S | 26 | HOH | 26.31 | - | - | - | - | - | - | - |
| S | 27 | HOH | 21.41 | - | - | - | - | - | - | - |
| S | 28 | HOH | 25.99 | - | - | - | - | - | - | - |
| S | 29 | HOH | 30.37 | - | - | - | - | - | - | - |
| S | 30 | HOH | 31.76 | - | - | - | - | - | - | - |

# Alt Res High B Clash > 0.4Å Ramachandran Rotamer Cβ deviation Bond lengths Bond angles Cis Peptides

Avg: Clashscore: 34.13    Outliers: 0 of 340    Poor rotamers: 2 of 294    Outliers: 0 of 323    Outliers: 0 of 348    Outliers: 1 of 348    Non-Trans: 1 of 345

|   |    |     |       |   |   |   |   |   |   |   |
|---|----|-----|-------|---|---|---|---|---|---|---|
| S | 31 | HOH | 26.43 | - | - | - | - | - | - | - |
| S | 32 | HOH | 29.23 | - | - | - | - | - | - | - |
| S | 33 | HOH | 25.06 | - | - | - | - | - | - | - |
| S | 34 | HOH | 24.84 | - | - | - | - | - | - | - |
| S | 35 | HOH | 17.91 | - | - | - | - | - | - | - |
| S | 36 | HOH | 30.8  | - | - | - | - | - | - | - |

|    |     |       |   |   |   |   |   |   |   |   |
|----|-----|-------|---|---|---|---|---|---|---|---|
| S  |     |       |   |   |   |   |   |   |   |   |
| 37 | HOH | 27.29 | - | - | - | - | - | - | - | - |
| S  |     |       |   |   |   |   |   |   |   |   |
| 38 | HOH | 31.24 | - | - | - | - | - | - | - | - |
| S  |     |       |   |   |   |   |   |   |   |   |
| 39 | HOH | 32.03 | - | - | - | - | - | - | - | - |
| S  |     |       |   |   |   |   |   |   |   |   |
| 40 | HOH | 30.51 | - | - | - | - | - | - | - | - |
| S  |     |       |   |   |   |   |   |   |   |   |
| 41 | HOH | 29.88 | - | - | - | - | - | - | - | - |
| S  |     |       |   |   |   |   |   |   |   |   |
| 42 | HOH | 28.83 | - | - | - | - | - | - | - | - |
| S  |     |       |   |   |   |   |   |   |   |   |
| 43 | HOH | 24.48 | - | - | - | - | - | - | - | - |
| S  |     |       |   |   |   |   |   |   |   |   |
| 44 | HOH | 25.96 | - | - | - | - | - | - | - | - |
| S  |     |       |   |   |   |   |   |   |   |   |
| 45 | HOH | 25.14 | - | - | - | - | - | - | - | - |
| S  |     |       |   |   |   |   |   |   |   |   |
| 46 | HOH | 26.79 | - | - | - | - | - | - | - | - |
| S  |     |       |   |   |   |   |   |   |   |   |
| 47 | HOH | 29.46 | - | - | - | - | - | - | - | - |
| S  |     |       |   |   |   |   |   |   |   |   |
| 48 | HOH | 27.52 | - | - | - | - | - | - | - | - |
| S  |     |       |   |   |   |   |   |   |   |   |
| 49 | HOH | 24.04 | - | - | - | - | - | - | - | - |
| S  |     |       |   |   |   |   |   |   |   |   |
| 50 | HOH | 23.26 | - | - | - | - | - | - | - | - |

**#** **Alt** **Res** **High** **Clash >** **Ramachandran** **Rotamer** **Cβ** **Bond** **Bond angles** **Cis**  
**B** **0.4Å**

Avg: Clashscore: 34.13    Outliers: 0 of 340    Poor rotamers: 2 of 294    Outliers: 0 of 323    Outliers: 0 of 348    Outliers: 1 of 348    Non-Trans: 1 of 345

|    |     |       |   |   |   |   |   |   |   |   |
|----|-----|-------|---|---|---|---|---|---|---|---|
| S  |     |       |   |   |   |   |   |   |   |   |
| 51 | HOH | 28.19 | - | - | - | - | - | - | - | - |
| S  |     |       |   |   |   |   |   |   |   |   |
| 52 | HOH | 27    | - | - | - | - | - | - | - | - |
| S  |     |       |   |   |   |   |   |   |   |   |
| 53 | HOH | 27.17 | - | - | - | - | - | - | - | - |
| S  |     |       |   |   |   |   |   |   |   |   |
| 54 | HOH | 28.85 | - | - | - | - | - | - | - | - |
| S  |     |       |   |   |   |   |   |   |   |   |
| 55 | HOH | 36.58 | - | - | - | - | - | - | - | - |
| S  |     |       |   |   |   |   |   |   |   |   |
| 56 | HOH | 27.48 | - | - | - | - | - | - | - | - |
| S  |     |       |   |   |   |   |   |   |   |   |
| 57 | HOH | 23.42 | - | - | - | - | - | - | - | - |

|    |     |       |   |   |   |   |   |   |   |
|----|-----|-------|---|---|---|---|---|---|---|
| S  | HOH | 26    | - | - | - | - | - | - | - |
| 58 |     |       |   |   |   |   |   |   |   |
| S  | HOH | 32.04 | - | - | - | - | - | - | - |
| 59 |     |       |   |   |   |   |   |   |   |
| S  | HOH | 21.63 | - | - | - | - | - | - | - |
| 60 |     |       |   |   |   |   |   |   |   |
| S  | HOH | 25.84 | - | - | - | - | - | - | - |
| 61 |     |       |   |   |   |   |   |   |   |
| S  | HOH | 29.82 | - | - | - | - | - | - | - |
| 62 |     |       |   |   |   |   |   |   |   |
| S  | HOH | 32.54 | - | - | - | - | - | - | - |
| 63 |     |       |   |   |   |   |   |   |   |
| S  | HOH | 25.69 | - | - | - | - | - | - | - |
| 64 |     |       |   |   |   |   |   |   |   |
| S  | HOH | 26.91 | - | - | - | - | - | - | - |
| 65 |     |       |   |   |   |   |   |   |   |
| S  | HOH | 29.26 | - | - | - | - | - | - | - |
| 66 |     |       |   |   |   |   |   |   |   |
| S  | HOH | 27.33 | - | - | - | - | - | - | - |
| 67 |     |       |   |   |   |   |   |   |   |
| S  | HOH | 33.39 | - | - | - | - | - | - | - |
| 68 |     |       |   |   |   |   |   |   |   |
| S  | HOH | 27.24 | - | - | - | - | - | - | - |
| 69 |     |       |   |   |   |   |   |   |   |
| S  | HOH | 33.31 | - | - | - | - | - | - | - |
| 70 |     |       |   |   |   |   |   |   |   |

| # | Alt | Res | High<br>B        | Clash ><br>0.4Å | Ramachandran        | Rotamer        | Cβ<br>deviation | Bond<br>lengths | Bond angles         | Cis<br>Peptides |
|---|-----|-----|------------------|-----------------|---------------------|----------------|-----------------|-----------------|---------------------|-----------------|
|   |     |     | Avg: Clashscore: | Outliers: 0 of  | Poor rotamers: 2 of | Outliers: 0 of | Outliers: 0 of  | Outliers: 1 of  | Non-Trans: 1 of 345 |                 |
|   |     |     | 34.13            | 340             | 294                 | 323            | 348             | 348             |                     |                 |

|    |     |       |   |   |   |   |   |   |   |
|----|-----|-------|---|---|---|---|---|---|---|
| S  | HOH | 28.41 | - | - | - | - | - | - | - |
| 71 |     |       |   |   |   |   |   |   |   |
| S  | HOH | 28.55 | - | - | - | - | - | - | - |
| 72 |     |       |   |   |   |   |   |   |   |
| S  | HOH | 34.31 | - | - | - | - | - | - | - |
| 73 |     |       |   |   |   |   |   |   |   |
| S  | HOH | 27.01 | - | - | - | - | - | - | - |
| 74 |     |       |   |   |   |   |   |   |   |
| S  | HOH | 29.95 | - | - | - | - | - | - | - |
| 75 |     |       |   |   |   |   |   |   |   |
| S  | HOH | 37.28 | - | - | - | - | - | - | - |
| 76 |     |       |   |   |   |   |   |   |   |
| S  | HOH | 30.25 | - | - | - | - | - | - | - |
| 77 |     |       |   |   |   |   |   |   |   |
| S  | HOH | 29.02 | - | - | - | - | - | - | - |
| 78 |     |       |   |   |   |   |   |   |   |

0.64Å  
O with A 147  
GLU OE1

|    |     |       |   |   |   |   |   |   |   |   |
|----|-----|-------|---|---|---|---|---|---|---|---|
| S  |     |       |   |   |   |   |   |   |   |   |
| 79 | HOH | 32.72 | - | - | - | - | - | - | - | - |
| S  |     |       |   |   |   |   |   |   |   |   |
| 80 | HOH | 29.66 | - | - | - | - | - | - | - | - |
| S  |     |       |   |   |   |   |   |   |   |   |
| 81 | HOH | 31.1  | - | - | - | - | - | - | - | - |
| S  |     |       |   |   |   |   |   |   |   |   |
| 82 | HOH | 32.14 | - | - | - | - | - | - | - | - |
| S  |     |       |   |   |   |   |   |   |   |   |
| 83 | HOH | 32.03 | - | - | - | - | - | - | - | - |
| S  |     |       |   |   |   |   |   |   |   |   |
| 84 | HOH | 27.41 | - | - | - | - | - | - | - | - |
| S  |     |       |   |   |   |   |   |   |   |   |
| 85 | HOH | 27.77 | - | - | - | - | - | - | - | - |
| S  |     |       |   |   |   |   |   |   |   |   |
| 86 | HOH | 23.9  | - | - | - | - | - | - | - | - |
| S  |     |       |   |   |   |   |   |   |   |   |
| 87 | HOH | 30.08 | - | - | - | - | - | - | - | - |
| S  |     |       |   |   |   |   |   |   |   |   |
| 88 | HOH | 30.39 | - | - | - | - | - | - | - | - |
| S  |     |       |   |   |   |   |   |   |   |   |
| 89 | HOH | 32.92 | - | - | - | - | - | - | - | - |
| S  |     |       |   |   |   |   |   |   |   |   |
| 90 | HOH | 30.04 | - | - | - | - | - | - | - | - |

# Alt Res High B Clash > 0.4Å Ramachandran Rotamer Cβ deviation Bond lengths Bond angles Cis Peptides

Avg: Clashscore: 34.13    Outliers: 0 of 340    Poor rotamers: 2 of 294    Outliers: 0 of 323    Outliers: 0 of 348    Outliers: 1 of 348    Non-Trans: 1 of 345

|    |     |       |   |   |   |   |   |   |   |   |
|----|-----|-------|---|---|---|---|---|---|---|---|
| S  |     |       |   |   |   |   |   |   |   |   |
| 91 | HOH | 32.99 | - | - | - | - | - | - | - | - |
| S  |     |       |   |   |   |   |   |   |   |   |
| 92 | HOH | 35.07 | - | - | - | - | - | - | - | - |
| S  |     |       |   |   |   |   |   |   |   |   |
| 93 | HOH | 33.02 | - | - | - | - | - | - | - | - |
| S  |     |       |   |   |   |   |   |   |   |   |
| 94 | HOH | 24.03 | - | - | - | - | - | - | - | - |
| S  |     |       |   |   |   |   |   |   |   |   |
| 95 | HOH | 29.91 | - | - | - | - | - | - | - | - |
| S  |     |       |   |   |   |   |   |   |   |   |
| 96 | HOH | 26.01 | - | - | - | - | - | - | - | - |
| S  |     |       |   |   |   |   |   |   |   |   |
| 97 | HOH | 36.55 | - | - | - | - | - | - | - | - |
| S  |     |       |   |   |   |   |   |   |   |   |
| 98 | HOH | 30.99 | - | - | - | - | - | - | - | - |
| S  |     |       |   |   |   |   |   |   |   |   |
| 99 | HOH | 28.07 | - | - | - | - | - | - | - | - |



|     |           |   |   |   |   |   |   |   |   |
|-----|-----------|---|---|---|---|---|---|---|---|
| S   | HOH 26.96 | - | - | - | - | - | - | - | - |
| 100 |           |   |   |   |   |   |   |   |   |
| S   | HOH 33.91 | - | - | - | - | - | - | - | - |
| 101 |           |   |   |   |   |   |   |   |   |
| S   | HOH 35.07 | - | - | - | - | - | - | - | - |
| 102 |           |   |   |   |   |   |   |   |   |
| S   | HOH 36.17 | - | - | - | - | - | - | - | - |
| 103 |           |   |   |   |   |   |   |   |   |
| S   | HOH 29.11 | - | - | - | - | - | - | - | - |
| 104 |           |   |   |   |   |   |   |   |   |
| S   | HOH 32.7  | - | - | - | - | - | - | - | - |
| 105 |           |   |   |   |   |   |   |   |   |
| S   | HOH 22.9  | - | - | - | - | - | - | - | - |
| 106 |           |   |   |   |   |   |   |   |   |
| S   | HOH 31.01 | - | - | - | - | - | - | - | - |
| 107 |           |   |   |   |   |   |   |   |   |
| S   | HOH 38.95 | - | - | - | - | - | - | - | - |
| 108 |           |   |   |   |   |   |   |   |   |
| S   | HOH 38.32 | - | - | - | - | - | - | - | - |
| 109 |           |   |   |   |   |   |   |   |   |
| S   | HOH 38.34 | - | - | - | - | - | - | - | - |
| 110 |           |   |   |   |   |   |   |   |   |

**#** **Alt Res** **High B** **Clash > 0.4Å** **Ramachandran** **Rotamer** **Cβ deviation** **Bond lengths** **Bond angles** **Cis Peptides**

Avg: Clashscore: 34.13    Outliers: 0 of 340    Poor rotamers: 2 of 294    Outliers: 0 of 323    Outliers: 0 of 348    Outliers: 1 of 348    Non-Trans: 1 of 345

|     |           |   |   |   |   |   |   |   |   |
|-----|-----------|---|---|---|---|---|---|---|---|
| S   | HOH 31.17 | - | - | - | - | - | - | - | - |
| 111 |           |   |   |   |   |   |   |   |   |
| S   | HOH 24.21 | - | - | - | - | - | - | - | - |
| 112 |           |   |   |   |   |   |   |   |   |
| S   | HOH 35.38 | - | - | - | - | - | - | - | - |
| 113 |           |   |   |   |   |   |   |   |   |
| S   | HOH 31.08 | - | - | - | - | - | - | - | - |
| 114 |           |   |   |   |   |   |   |   |   |
| S   | HOH 27.97 | - | - | - | - | - | - | - | - |
| 115 |           |   |   |   |   |   |   |   |   |
| S   | HOH 28.31 | - | - | - | - | - | - | - | - |
| 116 |           |   |   |   |   |   |   |   |   |
| S   | HOH 25.92 | - | - | - | - | - | - | - | - |
| 117 |           |   |   |   |   |   |   |   |   |
| S   | HOH 35.67 | - | - | - | - | - | - | - | - |
| 118 |           |   |   |   |   |   |   |   |   |
| S   | HOH 27.95 | - | - | - | - | - | - | - | - |
| 119 |           |   |   |   |   |   |   |   |   |
| S   | HOH 38.91 | - | - | - | - | - | - | - | - |
| 120 |           |   |   |   |   |   |   |   |   |

|   |     |     |       |   |   |   |   |   |   |   |
|---|-----|-----|-------|---|---|---|---|---|---|---|
| S | 121 | HOH | 37.34 | - | - | - | - | - | - | - |
| S | 122 | HOH | 32.65 | - | - | - | - | - | - | - |
| S | 123 | HOH | 36.27 | - | - | - | - | - | - | - |
| S | 124 | HOH | 47.54 | - | - | - | - | - | - | - |
| S | 125 | HOH | 35.54 | - | - | - | - | - | - | - |
| S | 126 | HOH | 31.37 | - | - | - | - | - | - | - |
| S | 127 | HOH | 32.59 | - | - | - | - | - | - | - |
| S | 128 | HOH | 25.42 | - | - | - | - | - | - | - |
| S | 129 | HOH | 40.11 | - | - | - | - | - | - | - |
| S | 130 | HOH | 27.11 | - | - | - | - | - | - | - |

**#** **Alt** **Res** **High B** **Clash > 0.4Å** **Ramachandran** **Rotamer** **Cβ deviation** **Bond lengths** **Bond angles** **Cis Peptides**

Avg: Clashscore: 34.13    Outliers: 0 of 340    Poor rotamers: 2 of 294    Outliers: 0 of 323    Outliers: 0 of 348    Outliers: 1 of 348    Non-Trans: 1 of 345

|   |     |     |       |   |   |   |   |   |   |   |
|---|-----|-----|-------|---|---|---|---|---|---|---|
| S | 131 | HOH | 33.95 | - | - | - | - | - | - | - |
| S | 132 | HOH | 28.57 | - | - | - | - | - | - | - |
| S | 133 | HOH | 47.03 | - | - | - | - | - | - | - |
| S | 134 | HOH | 31.47 | - | - | - | - | - | - | - |
| S | 135 | HOH | 32.21 | - | - | - | - | - | - | - |
| S | 136 | HOH | 29.37 | - | - | - | - | - | - | - |
| S | 137 | HOH | 31.43 | - | - | - | - | - | - | - |
| S | 138 | HOH | 35.44 | - | - | - | - | - | - | - |
| S | 139 | HOH | 24.94 | - | - | - | - | - | - | - |
| S | 140 | HOH | 34.87 | - | - | - | - | - | - | - |
| S | 141 | HOH | 34.4  | - | - | - | - | - | - | - |

|     |     |       |   |   |   |   |   |   |   |
|-----|-----|-------|---|---|---|---|---|---|---|
| S   | HOH | 33.6  | - | - | - | - | - | - | - |
| 142 |     |       |   |   |   |   |   |   |   |
| S   | HOH | 23.72 | - | - | - | - | - | - | - |
| 143 |     |       |   |   |   |   |   |   |   |
| S   | HOH | 39.85 | - | - | - | - | - | - | - |
| 144 |     |       |   |   |   |   |   |   |   |
| S   | HOH | 37.96 | - | - | - | - | - | - | - |
| 145 |     |       |   |   |   |   |   |   |   |
| S   | HOH | 31.37 | - | - | - | - | - | - | - |
| 146 |     |       |   |   |   |   |   |   |   |
| S   | HOH | 37.17 | - | - | - | - | - | - | - |
| 147 |     |       |   |   |   |   |   |   |   |
| S   | HOH | 26.28 | - | - | - | - | - | - | - |
| 148 |     |       |   |   |   |   |   |   |   |
| S   | HOH | 37.92 | - | - | - | - | - | - | - |
| 149 |     |       |   |   |   |   |   |   |   |
| S   | HOH | 33.88 | - | - | - | - | - | - | - |
| 150 |     |       |   |   |   |   |   |   |   |

| # | <u>Alt</u> | <u>Res</u> | <u>High</u><br><u>B</u> | <u>Clash &gt;</u><br><u>0.4Å</u> | <u>Ramachandran</u> | <u>Rotamer</u> | <u>Cβ</u><br><u>deviation</u> | <u>Bond</u><br><u>lengths</u> | <u>Bond angles</u> | <u>Cis</u><br><u>Peptides</u> |
|---|------------|------------|-------------------------|----------------------------------|---------------------|----------------|-------------------------------|-------------------------------|--------------------|-------------------------------|
|---|------------|------------|-------------------------|----------------------------------|---------------------|----------------|-------------------------------|-------------------------------|--------------------|-------------------------------|

|  |  |  |                  |                |                     |                    |                    |                    |                     |
|--|--|--|------------------|----------------|---------------------|--------------------|--------------------|--------------------|---------------------|
|  |  |  | Avg: Clashscore: | Outliers: 0 of | Poor rotamers: 2 of | Outliers: 0 of 323 | Outliers: 0 of 348 | Outliers: 1 of 348 | Non-Trans: 1 of 345 |
|  |  |  | 34.13            | 340            | 294                 |                    |                    |                    |                     |

|     |     |       |   |   |   |   |   |   |   |
|-----|-----|-------|---|---|---|---|---|---|---|
| S   | HOH | 27.31 | - | - | - | - | - | - | - |
| 151 |     |       |   |   |   |   |   |   |   |
| S   | HOH | 34.95 | - | - | - | - | - | - | - |
| 152 |     |       |   |   |   |   |   |   |   |
| S   | HOH | 48.92 | - | - | - | - | - | - | - |
| 153 |     |       |   |   |   |   |   |   |   |
| S   | HOH | 28.55 | - | - | - | - | - | - | - |
| 154 |     |       |   |   |   |   |   |   |   |
| S   | HOH | 35.85 | - | - | - | - | - | - | - |
| 155 |     |       |   |   |   |   |   |   |   |
| S   | HOH | 37.35 | - | - | - | - | - | - | - |
| 156 |     |       |   |   |   |   |   |   |   |
| S   | HOH | 22.01 | - | - | - | - | - | - | - |
| 157 |     |       |   |   |   |   |   |   |   |
| S   | HOH | 38.28 | - | - | - | - | - | - | - |
| 158 |     |       |   |   |   |   |   |   |   |
| S   | HOH | 29.06 | - | - | - | - | - | - | - |
| 159 |     |       |   |   |   |   |   |   |   |
| S   | HOH | 31.8  | - | - | - | - | - | - | - |
| 160 |     |       |   |   |   |   |   |   |   |
| S   | HOH | 31.74 | - | - | - | - | - | - | - |
| 161 |     |       |   |   |   |   |   |   |   |
| S   | HOH | 34.27 | - | - | - | - | - | - | - |
| 162 |     |       |   |   |   |   |   |   |   |

|     |     |       |   |   |   |   |   |   |   |   |
|-----|-----|-------|---|---|---|---|---|---|---|---|
| S   |     |       |   |   |   |   |   |   |   |   |
| 163 | HOH | 36.35 | - | - | - | - | - | - | - | - |
| S   |     |       |   |   |   |   |   |   |   |   |
| 164 | HOH | 30.88 | - | - | - | - | - | - | - | - |
| S   |     |       |   |   |   |   |   |   |   |   |
| 165 | HOH | 33.09 | - | - | - | - | - | - | - | - |
| S   |     |       |   |   |   |   |   |   |   |   |
| 166 | HOH | 30.64 | - | - | - | - | - | - | - | - |
| S   |     |       |   |   |   |   |   |   |   |   |
| 167 | HOH | 51.47 | - | - | - | - | - | - | - | - |
| S   |     |       |   |   |   |   |   |   |   |   |
| 168 | HOH | 35.98 | - | - | - | - | - | - | - | - |
| S   |     |       |   |   |   |   |   |   |   |   |
| 169 | HOH | 39.07 | - | - | - | - | - | - | - | - |
| S   |     |       |   |   |   |   |   |   |   |   |
| 170 | HOH | 52.01 | - | - | - | - | - | - | - | - |

| # | <u>Alt</u> | <u>Res</u> | <u>High</u><br><u>B</u> | <u>Clash &gt;</u><br><u>0.4Å</u> | <u>Ramachandran</u> | <u>Rotamer</u> | <u>Cβ</u><br><u>deviation</u> | <u>Bond</u><br><u>lengths</u> | <u>Bond angles</u> | <u>Cis</u><br><u>Peptides</u> |
|---|------------|------------|-------------------------|----------------------------------|---------------------|----------------|-------------------------------|-------------------------------|--------------------|-------------------------------|
|---|------------|------------|-------------------------|----------------------------------|---------------------|----------------|-------------------------------|-------------------------------|--------------------|-------------------------------|

|  |  |  |                  |                |                     |                    |                    |                    |                     |
|--|--|--|------------------|----------------|---------------------|--------------------|--------------------|--------------------|---------------------|
|  |  |  | Avg: Clashscore: | Outliers: 0 of | Poor rotamers: 2 of | Outliers: 0 of 323 | Outliers: 0 of 348 | Outliers: 1 of 348 | Non-Trans: 1 of 345 |
|  |  |  | 34.13            | 340            | 294                 |                    |                    |                    |                     |

|     |     |       |   |   |   |   |   |   |   |   |
|-----|-----|-------|---|---|---|---|---|---|---|---|
| S   |     |       |   |   |   |   |   |   |   |   |
| 171 | HOH | 26.97 | - | - | - | - | - | - | - | - |
| S   |     |       |   |   |   |   |   |   |   |   |
| 172 | HOH | 40.49 | - | - | - | - | - | - | - | - |
| S   |     |       |   |   |   |   |   |   |   |   |
| 173 | HOH | 38.27 | - | - | - | - | - | - | - | - |
| S   |     |       |   |   |   |   |   |   |   |   |
| 174 | HOH | 38.47 | - | - | - | - | - | - | - | - |
| S   |     |       |   |   |   |   |   |   |   |   |
| 175 | HOH | 49.04 | - | - | - | - | - | - | - | - |
| S   |     |       |   |   |   |   |   |   |   |   |
| 176 | HOH | 45.91 | - | - | - | - | - | - | - | - |
| S   |     |       |   |   |   |   |   |   |   |   |
| 177 | HOH | 33.34 | - | - | - | - | - | - | - | - |
| S   |     |       |   |   |   |   |   |   |   |   |
| 178 | HOH | 30.88 | - | - | - | - | - | - | - | - |
| S   |     |       |   |   |   |   |   |   |   |   |
| 179 | HOH | 33.5  | - | - | - | - | - | - | - | - |
| S   |     |       |   |   |   |   |   |   |   |   |
| 180 | HOH | 35.1  | - | - | - | - | - | - | - | - |
| S   |     |       |   |   |   |   |   |   |   |   |
| 181 | HOH | 31.59 | - | - | - | - | - | - | - | - |
| S   |     |       |   |   |   |   |   |   |   |   |
| 182 | HOH | 43.12 | - | - | - | - | - | - | - | - |
| S   |     |       |   |   |   |   |   |   |   |   |
| 183 | HOH | 45.14 | - | - | - | - | - | - | - | - |

|          |            |            |                  |                   |                     |                    |                    |                    |                     |                 |
|----------|------------|------------|------------------|-------------------|---------------------|--------------------|--------------------|--------------------|---------------------|-----------------|
| S        |            |            |                  |                   |                     |                    |                    |                    |                     |                 |
| 184      | HOH        | 35.07      | -                | -                 | -                   | -                  | -                  | -                  | -                   | -               |
| S        |            |            |                  |                   |                     |                    |                    |                    |                     |                 |
| 185      | HOH        | 40.72      | -                | -                 | -                   | -                  | -                  | -                  | -                   | -               |
| S        |            |            |                  |                   |                     |                    |                    |                    |                     |                 |
| 186      | HOH        | 41.63      | -                | -                 | -                   | -                  | -                  | -                  | -                   | -               |
| S        |            |            |                  |                   |                     |                    |                    |                    |                     |                 |
| 187      | HOH        | 42.6       | -                | -                 | -                   | -                  | -                  | -                  | -                   | -               |
| S        |            |            |                  |                   |                     |                    |                    |                    |                     |                 |
| 188      | HOH        | 49.56      | -                | -                 | -                   | -                  | -                  | -                  | -                   | -               |
| S        |            |            |                  |                   |                     |                    |                    |                    |                     |                 |
| 189      | HOH        | 46.35      | -                | -                 | -                   | -                  | -                  | -                  | -                   | -               |
| S        |            |            |                  |                   |                     |                    |                    |                    |                     |                 |
| 190      | HOH        | 30.12      | -                | -                 | -                   | -                  | -                  | -                  | -                   | -               |
| <b>#</b> | <b>Alt</b> | <b>Res</b> | <b>High</b>      | <b>Clash &gt;</b> | <b>Ramachandran</b> | <b>Rotamer</b>     | <b>Cβ</b>          | <b>Bond</b>        | <b>Bond angles</b>  | <b>Cis</b>      |
|          |            |            | <b>B</b>         | <b>0.4Å</b>       |                     |                    | <b>deviation</b>   | <b>lengths</b>     |                     | <b>Peptides</b> |
|          |            |            |                  |                   |                     |                    |                    |                    |                     |                 |
|          |            |            | Avg: Clashscore: | Outliers: 0 of    | Poor rotamers: 2 of | Outliers: 0 of 323 | Outliers: 0 of 348 | Outliers: 1 of 348 | Non-Trans: 1 of 345 |                 |
|          |            |            | 34.13            | 2.93              | 340                 | 294                |                    |                    |                     |                 |
| S        |            |            |                  |                   |                     |                    |                    |                    |                     |                 |
| 191      | HOH        | 34.72      | -                | -                 | -                   | -                  | -                  | -                  | -                   | -               |
| S        |            |            |                  |                   |                     |                    |                    |                    |                     |                 |
| 192      | HOH        | 37.77      | -                | -                 | -                   | -                  | -                  | -                  | -                   | -               |
| S        |            |            |                  |                   |                     |                    |                    |                    |                     |                 |
| 193      | HOH        | 41.16      | -                | -                 | -                   | -                  | -                  | -                  | -                   | -               |
| S        |            |            |                  |                   |                     |                    |                    |                    |                     |                 |
| 194      | HOH        | 39.97      | -                | -                 | -                   | -                  | -                  | -                  | -                   | -               |
| S        |            |            |                  |                   |                     |                    |                    |                    |                     |                 |
| 195      | HOH        | 41.94      | -                | -                 | -                   | -                  | -                  | -                  | -                   | -               |
| S        |            |            |                  |                   |                     |                    |                    |                    |                     |                 |
| 196      | HOH        | 39.03      | -                | -                 | -                   | -                  | -                  | -                  | -                   | -               |
| S        |            |            |                  |                   |                     |                    |                    |                    |                     |                 |
| 197      | HOH        | 51.01      | -                | -                 | -                   | -                  | -                  | -                  | -                   | -               |
| S        |            |            |                  |                   |                     |                    |                    |                    |                     |                 |
| 198      | HOH        | 49.96      | -                | -                 | -                   | -                  | -                  | -                  | -                   | -               |
| S        |            |            |                  |                   |                     |                    |                    |                    |                     |                 |
| 199      | HOH        | 33.98      | -                | -                 | -                   | -                  | -                  | -                  | -                   | -               |
| S        |            |            |                  |                   |                     |                    |                    |                    |                     |                 |
| 200      | HOH        | 38.64      | -                | -                 | -                   | -                  | -                  | -                  | -                   | -               |
| S        |            |            |                  |                   |                     |                    |                    |                    |                     |                 |
| 201      | HOH        | 37.79      | -                | -                 | -                   | -                  | -                  | -                  | -                   | -               |
| S        |            |            |                  |                   |                     |                    |                    |                    |                     |                 |
| 202      | HOH        | 51.04      | -                | -                 | -                   | -                  | -                  | -                  | -                   | -               |
| S        |            |            |                  |                   |                     |                    |                    |                    |                     |                 |
| 203      | HOH        | 45.05      | -                | -                 | -                   | -                  | -                  | -                  | -                   | -               |
| S        |            |            |                  |                   |                     |                    |                    |                    |                     |                 |
| 204      | HOH        | 47.8       | -                | -                 | -                   | -                  | -                  | -                  | -                   | -               |

|     |     |       |   |   |   |   |   |   |   |
|-----|-----|-------|---|---|---|---|---|---|---|
| S   | HOH | 33.44 | - | - | - | - | - | - | - |
| 205 |     |       |   |   |   |   |   |   |   |
| S   | HOH | 33.71 | - | - | - | - | - | - | - |
| 206 |     |       |   |   |   |   |   |   |   |
| S   | HOH | 49.62 | - | - | - | - | - | - | - |
| 207 |     |       |   |   |   |   |   |   |   |
| S   | HOH | 43.7  | - | - | - | - | - | - | - |
| 208 |     |       |   |   |   |   |   |   |   |
| S   | HOH | 43.78 | - | - | - | - | - | - | - |
| 209 |     |       |   |   |   |   |   |   |   |
| S   | HOH | 49.24 | - | - | - | - | - | - | - |
| 210 |     |       |   |   |   |   |   |   |   |

| # | Alt | Res | <u>High</u><br><u>B</u> | <u>Clash &gt;</u><br><u>0.4Å</u> | <u>Ramachandran</u> | <u>Rotamer</u> | <u>Cβ</u><br><u>deviation</u> | <u>Bond</u><br><u>lengths</u> | <u>Bond angles</u> | <u>Cis</u><br><u>Peptides</u> |
|---|-----|-----|-------------------------|----------------------------------|---------------------|----------------|-------------------------------|-------------------------------|--------------------|-------------------------------|
|---|-----|-----|-------------------------|----------------------------------|---------------------|----------------|-------------------------------|-------------------------------|--------------------|-------------------------------|

|                  |                |                     |           |           |                |                  |
|------------------|----------------|---------------------|-----------|-----------|----------------|------------------|
| Avg: Clashscore: | Outliers: 0 of | Poor rotamers: 2 of | Outliers: | Outliers: | Outliers: 1 of | Non-<br>Trans: 1 |
| 34.13            | 340            | 294                 | 0 of 323  | 0 of 348  | 348            | of 345           |

|     |     |       |                                 |   |   |   |   |   |   |
|-----|-----|-------|---------------------------------|---|---|---|---|---|---|
| S   | HOH | 50.3  | -                               | - | - | - | - | - | - |
| 211 |     |       |                                 |   |   |   |   |   |   |
| S   | HOH | 44.22 | -                               | - | - | - | - | - | - |
| 212 |     |       |                                 |   |   |   |   |   |   |
| S   | HOH | 46.01 | 0.67Å<br>O with A 132<br>LYS NZ | - | - | - | - | - | - |
| 213 |     |       |                                 |   |   |   |   |   |   |
| S   | HOH | 37.38 | -                               | - | - | - | - | - | - |
| 214 |     |       |                                 |   |   |   |   |   |   |
| S   | HOH | 36.44 | -                               | - | - | - | - | - | - |
| 215 |     |       |                                 |   |   |   |   |   |   |
| S   | HOH | 43.41 | -                               | - | - | - | - | - | - |
| 216 |     |       |                                 |   |   |   |   |   |   |
| S   | HOH | 39.5  | -                               | - | - | - | - | - | - |
| 217 |     |       |                                 |   |   |   |   |   |   |
| S   | HOH | 55.22 | -                               | - | - | - | - | - | - |
| 218 |     |       |                                 |   |   |   |   |   |   |
| S   | HOH | 27.22 | -                               | - | - | - | - | - | - |
| 219 |     |       |                                 |   |   |   |   |   |   |
| S   | HOH | 30.68 | -                               | - | - | - | - | - | - |
| 220 |     |       |                                 |   |   |   |   |   |   |
| S   | HOH | 49.24 | -                               | - | - | - | - | - | - |
| 221 |     |       |                                 |   |   |   |   |   |   |
| S   | HOH | 53.87 | -                               | - | - | - | - | - | - |
| 222 |     |       |                                 |   |   |   |   |   |   |
| S   | HOH | 43.36 | -                               | - | - | - | - | - | - |
| 223 |     |       |                                 |   |   |   |   |   |   |
| S   | HOH | 51.51 | -                               | - | - | - | - | - | - |
| 224 |     |       |                                 |   |   |   |   |   |   |
| S   | HOH | 41.35 | -                               | - | - | - | - | - | - |
| 225 |     |       |                                 |   |   |   |   |   |   |

|                  |                |               |                                  |                     |                |                     |                     |                    |                     |   |   |   |
|------------------|----------------|---------------|----------------------------------|---------------------|----------------|---------------------|---------------------|--------------------|---------------------|---|---|---|
| S                |                |               |                                  |                     |                |                     |                     |                    |                     |   |   |   |
| 226              | HOH            | 30.88         | -                                | -                   | -              | -                   | -                   | -                  | -                   | - | - | - |
| S                |                |               |                                  |                     |                |                     |                     |                    |                     |   |   |   |
| 227              | HOH            | 45.5          | -                                | -                   | -              | -                   | -                   | -                  | -                   | - | - | - |
| S                |                |               |                                  |                     |                |                     |                     |                    |                     |   |   |   |
| 228              | HOH            | 49.58         | -                                | -                   | -              | -                   | -                   | -                  | -                   | - | - | - |
| S                |                |               |                                  |                     |                |                     |                     |                    |                     |   |   |   |
| 229              | HOH            | 37.84         | -                                | -                   | -              | -                   | -                   | -                  | -                   | - | - | - |
| S                |                |               |                                  |                     |                |                     |                     |                    |                     |   |   |   |
| 230              | HOH            | 37.74         | -                                | -                   | -              | -                   | -                   | -                  | -                   | - | - | - |
| <b>#</b>         | <b>Alt Res</b> | <b>High B</b> | <b>Clash &gt; 0.4Å</b>           | <b>Ramachandran</b> | <b>Rotamer</b> | <b>Cβ deviation</b> | <b>Bond lengths</b> | <b>Bond angles</b> | <b>Cis Peptides</b> |   |   |   |
| Avg: Clashscore: |                |               | Outliers: 0 of                   | Poor rotamers: 2 of | Outliers: 0 of | Outliers: 0 of      | Outliers: 0 of      | Outliers: 1 of     | Non-Trans: 1        |   |   |   |
| 34.13            |                |               | 340                              | 294                 | 0 of 323       | 0 of 348            | 348                 | of 345             |                     |   |   |   |
| S                |                |               |                                  |                     |                |                     |                     |                    |                     |   |   |   |
| 231              | HOH            | 46.62         | -                                | -                   | -              | -                   | -                   | -                  | -                   | - | - | - |
| S                |                |               |                                  |                     |                |                     |                     |                    |                     |   |   |   |
| 232              | HOH            | 46.52         | -                                | -                   | -              | -                   | -                   | -                  | -                   | - | - | - |
| S                |                |               |                                  |                     |                |                     |                     |                    |                     |   |   |   |
| 233              | HOH            | 41.89         | -                                | -                   | -              | -                   | -                   | -                  | -                   | - | - | - |
| S                |                |               |                                  |                     |                |                     |                     |                    |                     |   |   |   |
| 234              | HOH            | 45.05         | -                                | -                   | -              | -                   | -                   | -                  | -                   | - | - | - |
| S                |                |               |                                  |                     |                |                     |                     |                    |                     |   |   |   |
| 235              | HOH            | 42.62         | -                                | -                   | -              | -                   | -                   | -                  | -                   | - | - | - |
| S                |                |               |                                  |                     |                |                     |                     |                    |                     |   |   |   |
| 236              | HOH            | 48.18         | -                                | -                   | -              | -                   | -                   | -                  | -                   | - | - | - |
| S                |                |               |                                  |                     |                |                     |                     |                    |                     |   |   |   |
| 237              | HOH            | 38.77         | 0.72Å<br>O with A 162<br>GLU OE1 | -                   | -              | -                   | -                   | -                  | -                   | - | - | - |
| S                |                |               |                                  |                     |                |                     |                     |                    |                     |   |   |   |
| 238              | HOH            | 53.71         | -                                | -                   | -              | -                   | -                   | -                  | -                   | - | - | - |
| S                |                |               |                                  |                     |                |                     |                     |                    |                     |   |   |   |
| 239              | HOH            | 44.46         | -                                | -                   | -              | -                   | -                   | -                  | -                   | - | - | - |
| S                |                |               |                                  |                     |                |                     |                     |                    |                     |   |   |   |
| 240              | HOH            | 48.85         | -                                | -                   | -              | -                   | -                   | -                  | -                   | - | - | - |
| S                |                |               |                                  |                     |                |                     |                     |                    |                     |   |   |   |
| 241              | HOH            | 40.03         | -                                | -                   | -              | -                   | -                   | -                  | -                   | - | - | - |
| S                |                |               |                                  |                     |                |                     |                     |                    |                     |   |   |   |
| 242              | HOH            | 38.87         | -                                | -                   | -              | -                   | -                   | -                  | -                   | - | - | - |
| S                |                |               |                                  |                     |                |                     |                     |                    |                     |   |   |   |
| 243              | HOH            | 40.68         | -                                | -                   | -              | -                   | -                   | -                  | -                   | - | - | - |
| S                |                |               |                                  |                     |                |                     |                     |                    |                     |   |   |   |
| 244              | HOH            | 58.94         | -                                | -                   | -              | -                   | -                   | -                  | -                   | - | - | - |
| S                |                |               |                                  |                     |                |                     |                     |                    |                     |   |   |   |
| 245              | HOH            | 46.87         | -                                | -                   | -              | -                   | -                   | -                  | -                   | - | - | - |
| S                |                |               |                                  |                     |                |                     |                     |                    |                     |   |   |   |
| 246              | HOH            | 49.76         | -                                | -                   | -              | -                   | -                   | -                  | -                   | - | - | - |

|          |                |               |                              |                     |                         |                     |                     |                    |                     |   |
|----------|----------------|---------------|------------------------------|---------------------|-------------------------|---------------------|---------------------|--------------------|---------------------|---|
| S        | HOH            | 48.41         | -                            | -                   | -                       | -                   | -                   | -                  | -                   | - |
| 247      |                |               |                              |                     |                         |                     |                     |                    |                     |   |
| S        | HOH            | 42.06         | -                            | -                   | -                       | -                   | -                   | -                  | -                   | - |
| 248      |                |               |                              |                     |                         |                     |                     |                    |                     |   |
| S        | HOH            | 31.2          | -                            | -                   | -                       | -                   | -                   | -                  | -                   | - |
| 249      |                |               |                              |                     |                         |                     |                     |                    |                     |   |
| S        | HOH            | 39.91         | -                            | -                   | -                       | -                   | -                   | -                  | -                   | - |
| 250      |                |               |                              |                     |                         |                     |                     |                    |                     |   |
| <b>#</b> | <b>Alt Res</b> | <b>High B</b> | <b>Clash &gt; 0.4Å</b>       | <b>Ramachandran</b> | <b>Rotamer</b>          | <b>Cβ deviation</b> | <b>Bond lengths</b> | <b>Bond angles</b> | <b>Cis Peptides</b> |   |
|          |                |               | Avg: Clashscore: 34.13       | Outliers: 0 of 340  | Poor rotamers: 2 of 294 | Outliers: 0 of 323  | Outliers: 0 of 348  | Outliers: 1 of 348 | Non-Trans: 1 of 345 |   |
| S        | HOH            | 47.73         | 0.47Å<br>O with A 1<br>ALA N | -                   | -                       | -                   | -                   | -                  | -                   | - |
| 251      |                |               |                              |                     |                         |                     |                     |                    |                     |   |
| S        | HOH            | 52.67         | -                            | -                   | -                       | -                   | -                   | -                  | -                   | - |
| 252      |                |               |                              |                     |                         |                     |                     |                    |                     |   |
| S        | HOH            | 43.01         | -                            | -                   | -                       | -                   | -                   | -                  | -                   | - |
| 253      |                |               |                              |                     |                         |                     |                     |                    |                     |   |
| S        | HOH            | 49.13         | -                            | -                   | -                       | -                   | -                   | -                  | -                   | - |
| 254      |                |               |                              |                     |                         |                     |                     |                    |                     |   |
| S        | HOH            | 53.62         | -                            | -                   | -                       | -                   | -                   | -                  | -                   | - |
| 255      |                |               |                              |                     |                         |                     |                     |                    |                     |   |
| S        | HOH            | 33.34         | -                            | -                   | -                       | -                   | -                   | -                  | -                   | - |
| 256      |                |               |                              |                     |                         |                     |                     |                    |                     |   |
| S        | HOH            | 45.97         | -                            | -                   | -                       | -                   | -                   | -                  | -                   | - |
| 257      |                |               |                              |                     |                         |                     |                     |                    |                     |   |
| S        | HOH            | 48.12         | -                            | -                   | -                       | -                   | -                   | -                  | -                   | - |
| 258      |                |               |                              |                     |                         |                     |                     |                    |                     |   |
| S        | HOH            | 41.11         | -                            | -                   | -                       | -                   | -                   | -                  | -                   | - |
| 259      |                |               |                              |                     |                         |                     |                     |                    |                     |   |
| S        | HOH            | 42.95         | -                            | -                   | -                       | -                   | -                   | -                  | -                   | - |
| 260      |                |               |                              |                     |                         |                     |                     |                    |                     |   |
| S        | HOH            | 46.83         | -                            | -                   | -                       | -                   | -                   | -                  | -                   | - |
| 261      |                |               |                              |                     |                         |                     |                     |                    |                     |   |
| S        | HOH            | 32.81         | -                            | -                   | -                       | -                   | -                   | -                  | -                   | - |
| 262      |                |               |                              |                     |                         |                     |                     |                    |                     |   |
| S        | HOH            | 43.66         | -                            | -                   | -                       | -                   | -                   | -                  | -                   | - |
| 263      |                |               |                              |                     |                         |                     |                     |                    |                     |   |
| S        | HOH            | 46.28         | -                            | -                   | -                       | -                   | -                   | -                  | -                   | - |
| 264      |                |               |                              |                     |                         |                     |                     |                    |                     |   |
| S        | HOH            | 24.79         | -                            | -                   | -                       | -                   | -                   | -                  | -                   | - |
| 265      |                |               |                              |                     |                         |                     |                     |                    |                     |   |
| S        | HOH            | 44.96         | -                            | -                   | -                       | -                   | -                   | -                  | -                   | - |
| 266      |                |               |                              |                     |                         |                     |                     |                    |                     |   |
| S        | HOH            | 51.72         | -                            | -                   | -                       | -                   | -                   | -                  | -                   | - |
| 267      |                |               |                              |                     |                         |                     |                     |                    |                     |   |



|          |            |            |                  |                   |                     |                |                            |                |                    |                 |   |   |
|----------|------------|------------|------------------|-------------------|---------------------|----------------|----------------------------|----------------|--------------------|-----------------|---|---|
| S        |            |            |                  |                   |                     |                |                            |                |                    |                 |   |   |
| 268      |            | HOH 47.41  | -                | -                 | -                   | -              | -                          | -              | -                  | -               | - | - |
| S        |            |            |                  |                   |                     |                |                            |                |                    |                 |   |   |
| 269      |            | HOH 44.83  | -                | -                 | -                   | -              | -                          | -              | -                  | -               | - | - |
| S        |            |            |                  |                   |                     |                |                            |                |                    |                 |   |   |
| 270      |            | HOH 33.25  | -                | -                 | -                   | -              | -                          | -              | -                  | -               | - | - |
| <b>#</b> | <b>Alt</b> | <b>Res</b> | <b>High</b>      | <b>Clash &gt;</b> | <b>Ramachandran</b> | <b>Rotamer</b> | <b>C<math>\beta</math></b> | <b>Bond</b>    | <b>Bond angles</b> | <b>Cis</b>      |   |   |
|          |            |            | <b>B</b>         | <b>0.4Å</b>       |                     |                | <b>deviation</b>           | <b>lengths</b> |                    | <b>Peptides</b> |   |   |
|          |            |            |                  |                   |                     |                |                            |                |                    |                 |   |   |
|          |            |            | Avg: Clashscore: | Outliers: 0 of    | Poor rotamers: 2 of | Outliers: 0 of | Outliers: 0 of             | Outliers: 0 of | Outliers: 1 of     | Non-            |   |   |
|          |            |            | 34.13            | 340               | 294                 | 0 of 323       | 0 of 348                   | 0 of 348       | 348                | Trans: 1        |   |   |
|          |            |            |                  |                   |                     |                |                            |                |                    | of 345          |   |   |
| S        |            |            |                  |                   |                     |                |                            |                |                    |                 |   |   |
| 271      |            | HOH 35.34  | -                | -                 | -                   | -              | -                          | -              | -                  | -               | - | - |
| S        |            |            |                  |                   |                     |                |                            |                |                    |                 |   |   |
| 272      |            | HOH 52.47  | -                | -                 | -                   | -              | -                          | -              | -                  | -               | - | - |
| S        |            |            |                  |                   |                     |                |                            |                |                    |                 |   |   |
| 273      |            | HOH 42.62  | -                | -                 | -                   | -              | -                          | -              | -                  | -               | - | - |
| S        |            |            |                  |                   |                     |                |                            |                |                    |                 |   |   |
| 274      |            | HOH 46.72  | -                | -                 | -                   | -              | -                          | -              | -                  | -               | - | - |
| S        |            |            |                  |                   |                     |                |                            |                |                    |                 |   |   |
| 275      |            | HOH 45.46  | -                | -                 | -                   | -              | -                          | -              | -                  | -               | - | - |
| S        |            |            |                  |                   |                     |                |                            |                |                    |                 |   |   |
| 276      |            | HOH 39.97  | -                | -                 | -                   | -              | -                          | -              | -                  | -               | - | - |
| S        |            |            |                  |                   |                     |                |                            |                |                    |                 |   |   |
| 277      |            | HOH 60.45  | -                | -                 | -                   | -              | -                          | -              | -                  | -               | - | - |
| S        |            |            |                  |                   |                     |                |                            |                |                    |                 |   |   |
| 278      |            | HOH 54.7   | -                | -                 | -                   | -              | -                          | -              | -                  | -               | - | - |
| S        |            |            |                  |                   |                     |                |                            |                |                    |                 |   |   |
| 279      |            | HOH 48.2   | -                | -                 | -                   | -              | -                          | -              | -                  | -               | - | - |
| S        |            |            |                  |                   |                     |                |                            |                |                    |                 |   |   |
| 280      |            | HOH 55.15  | -                | -                 | -                   | -              | -                          | -              | -                  | -               | - | - |
| S        |            |            |                  |                   |                     |                |                            |                |                    |                 |   |   |
| 281      |            | HOH 49.64  | -                | -                 | -                   | -              | -                          | -              | -                  | -               | - | - |
| S        |            |            |                  |                   |                     |                |                            |                |                    |                 |   |   |
| 282      |            | HOH 49.24  | -                | -                 | -                   | -              | -                          | -              | -                  | -               | - | - |
| S        |            |            |                  |                   |                     |                |                            |                |                    |                 |   |   |
| 283      |            | HOH 58.09  | -                | -                 | -                   | -              | -                          | -              | -                  | -               | - | - |
| S        |            |            |                  |                   |                     |                |                            |                |                    |                 |   |   |
| 284      |            | HOH 50.01  | -                | -                 | -                   | -              | -                          | -              | -                  | -               | - | - |
| S        |            |            |                  |                   |                     |                |                            |                |                    |                 |   |   |
| 285      |            | HOH 39.72  | -                | -                 | -                   | -              | -                          | -              | -                  | -               | - | - |
| S        |            |            |                  |                   |                     |                |                            |                |                    |                 |   |   |
| 286      |            | HOH 38.76  | -                | -                 | -                   | -              | -                          | -              | -                  | -               | - | - |
| S        |            |            |                  |                   |                     |                |                            |                |                    |                 |   |   |
| 287      |            | HOH 35.23  | -                | -                 | -                   | -              | -                          | -              | -                  | -               | - | - |
| S        |            |            |                  |                   |                     |                |                            |                |                    |                 |   |   |
| 288      |            | HOH 38.55  | -                | -                 | -                   | -              | -                          | -              | -                  | -               | - | - |

| #     | Alt Res   | <u>High B</u>    | <u>Clash &gt; 0.4Å</u> | <u>Ramachandran</u> | <u>Rotamer</u> | <u>Cβ deviation</u> | <u>Bond lengths</u> | <u>Bond angles</u> | <u>Cis Peptides</u> |
|-------|-----------|------------------|------------------------|---------------------|----------------|---------------------|---------------------|--------------------|---------------------|
| S 289 | HOH 50    | -                | -                      | -                   | -              | -                   | -                   | -                  | -                   |
| S 290 | HOH 45.97 | -                | -                      | -                   | -              | -                   | -                   | -                  | -                   |
|       |           | Avg: Clashscore: | Outliers: 0 of         | Poor rotamers: 2 of | Outliers: 0 of | Outliers: 0 of      | Outliers: 1 of      | Non-Trans: 1 of    |                     |
|       |           | 34.13            | 340                    | 294                 | 323            | 348                 | 348                 | 345                |                     |
| S 291 | HOH 48.69 | -                | -                      | -                   | -              | -                   | -                   | -                  | -                   |
| S 292 | HOH 52.11 | -                | -                      | -                   | -              | -                   | -                   | -                  | -                   |
| S 293 | HOH 44.85 | -                | -                      | -                   | -              | -                   | -                   | -                  | -                   |
| S 294 | HOH 45.8  | -                | -                      | -                   | -              | -                   | -                   | -                  | -                   |
| S 295 | HOH 41.12 | -                | -                      | -                   | -              | -                   | -                   | -                  | -                   |
| S 296 | HOH 35.27 | -                | -                      | -                   | -              | -                   | -                   | -                  | -                   |
| S 297 | HOH 46.71 | -                | -                      | -                   | -              | -                   | -                   | -                  | -                   |
| S 298 | HOH 36.49 | -                | -                      | -                   | -              | -                   | -                   | -                  | -                   |
| S 299 | HOH 44.13 | -                | -                      | -                   | -              | -                   | -                   | -                  | -                   |
| S 300 | HOH 39.32 | -                | -                      | -                   | -              | -                   | -                   | -                  | -                   |
| S 301 | HOH 57.19 | -                | -                      | -                   | -              | -                   | -                   | -                  | -                   |
| S 302 | HOH 52.23 | -                | -                      | -                   | -              | -                   | -                   | -                  | -                   |
| S 303 | HOH 43.31 | -                | -                      | -                   | -              | -                   | -                   | -                  | -                   |
| S 304 | HOH 54.17 | -                | -                      | -                   | -              | -                   | -                   | -                  | -                   |
| S 305 | HOH 44.2  | -                | -                      | -                   | -              | -                   | -                   | -                  | -                   |
| S 306 | HOH 48.59 | -                | -                      | -                   | -              | -                   | -                   | -                  | -                   |
| S 307 | HOH 53.15 | -                | -                      | -                   | -              | -                   | -                   | -                  | -                   |
| S 308 | HOH 36.2  | -                | -                      | -                   | -              | -                   | -                   | -                  | -                   |
| S 309 | HOH 41.84 | -                | -                      | -                   | -              | -                   | -                   | -                  | -                   |

| <u>#</u> | <u>Alt Res</u> | <u>High B</u>    | <u>Clash &gt; 0.4Å</u> | <u>Ramachandran</u> | <u>Rotamer</u> | <u>Cβ deviation</u> | <u>Bond lengths</u> | <u>Bond angles</u>  | <u>Cis Peptides</u> |
|----------|----------------|------------------|------------------------|---------------------|----------------|---------------------|---------------------|---------------------|---------------------|
| S<br>310 | HOH 51.07      | -                | -                      | -                   | -              | -                   | -                   | -                   | -                   |
|          |                | Avg: Clashscore: | Outliers: 0 of         | Poor rotamers: 2 of | Outliers: 0 of | Outliers: 0 of      | Outliers: 1 of      | Non-Trans: 1 of 345 |                     |
|          |                | 34.13            | 2.93                   | 340                 | 294            | 323                 | 348                 | 348                 |                     |
| S<br>311 | HOH 54.41      | -                | -                      | -                   | -              | -                   | -                   | -                   | -                   |
| S<br>312 | HOH 59.45      | -                | -                      | -                   | -              | -                   | -                   | -                   | -                   |
| S<br>313 | HOH 74.24      | -                | -                      | -                   | -              | -                   | -                   | -                   | -                   |
| S<br>314 | HOH 54.57      | -                | -                      | -                   | -              | -                   | -                   | -                   | -                   |
| S<br>315 | HOH 50.96      | -                | -                      | -                   | -              | -                   | -                   | -                   | -                   |
| S<br>316 | HOH 43.59      | -                | -                      | -                   | -              | -                   | -                   | -                   | -                   |
| S<br>317 | HOH 47.83      | -                | -                      | -                   | -              | -                   | -                   | -                   | -                   |
| S<br>318 | HOH 64.92      | -                | -                      | -                   | -              | -                   | -                   | -                   | -                   |
| S<br>319 | HOH 52.51      | -                | -                      | -                   | -              | -                   | -                   | -                   | -                   |
| S<br>320 | HOH 33.38      | -                | -                      | -                   | -              | -                   | -                   | -                   | -                   |
| S<br>321 | HOH 42.54      | -                | -                      | -                   | -              | -                   | -                   | -                   | -                   |
| S<br>322 | HOH 49.21      | -                | -                      | -                   | -              | -                   | -                   | -                   | -                   |
| S<br>324 | HOH 53.69      | -                | -                      | -                   | -              | -                   | -                   | -                   | -                   |
| S<br>325 | HOH 57.61      | -                | -                      | -                   | -              | -                   | -                   | -                   | -                   |
| S<br>326 | HOH 47.38      | -                | -                      | -                   | -              | -                   | -                   | -                   | -                   |
| S<br>327 | HOH 61.96      | -                | -                      | -                   | -              | -                   | -                   | -                   | -                   |
| S<br>328 | HOH 53.77      | -                | -                      | -                   | -              | -                   | -                   | -                   | -                   |
| S<br>329 | HOH 54.33      | -                | -                      | -                   | -              | -                   | -                   | -                   | -                   |
| S<br>330 | HOH 58.56      | -                | -                      | -                   | -              | -                   | -                   | -                   | -                   |
| S<br>331 | HOH 66.5       | -                | -                      | -                   | -              | -                   | -                   | -                   | -                   |

| #     | Alt Res | High B     | Clash > 0.4Å                   | Ramachandran       | Rotamer                 | Cβ deviation       | Bond lengths       | Bond angles        | Cis Peptides        |
|-------|---------|------------|--------------------------------|--------------------|-------------------------|--------------------|--------------------|--------------------|---------------------|
|       |         | Avg: 34.13 | Clashscore: 2.93               | Outliers: 0 of 340 | Poor rotamers: 2 of 294 | Outliers: 0 of 323 | Outliers: 0 of 348 | Outliers: 1 of 348 | Non-Trans: 1 of 345 |
| S 332 | HOH     | 56.58      | -                              | -                  | -                       | -                  | -                  | -                  | -                   |
| S 333 | HOH     | 58.82      | -                              | -                  | -                       | -                  | -                  | -                  | -                   |
| S 334 | HOH     | 51.01      | 0.73Å<br>O with A 310<br>GLY O | -                  | -                       | -                  | -                  | -                  | -                   |
| S 335 | HOH     | 70.34      | -                              | -                  | -                       | -                  | -                  | -                  | -                   |
| S 336 | HOH     | 54.01      | -                              | -                  | -                       | -                  | -                  | -                  | -                   |
| S 337 | HOH     | 56.09      | -                              | -                  | -                       | -                  | -                  | -                  | -                   |
| S 338 | HOH     | 49.21      | -                              | -                  | -                       | -                  | -                  | -                  | -                   |
| S 339 | HOH     | 61.24      | -                              | -                  | -                       | -                  | -                  | -                  | -                   |
| S 340 | HOH     | 59.04      | -                              | -                  | -                       | -                  | -                  | -                  | -                   |
| S 341 | HOH     | 68.85      | -                              | -                  | -                       | -                  | -                  | -                  | -                   |

About [MolProbity](#) | Website for [the Richardson Lab](#) | Using ecloud x-H | Internal reference 4.4
