# Supplementary material for: Biochemical and structural characterization of a novel arginine kinase from the spiderPolybetes pythagoricus
Source: PeerJ journal article supplement (doi:10.7717/peerj.3787), 2017-09-11
Supplement: MOLPROBITY_validation_spiderApoAK_UPDATED-5U8E.pdf [file MOLPROBITY_validation_spiderApoAK_UPDATED-5U8E.pdf]

M<sub>0</sub>

# Viewing spiderApoAK\_UPDATED-5U8EFH-multi.table

When finished, you should 

Hint: Use File | Save As... to save a copy of this page.

|                   |                                                                               |          |                                                        |                                |
|-------------------|-------------------------------------------------------------------------------|----------|--------------------------------------------------------|--------------------------------|
| All-Atom Contacts | Clashscore, all atoms:                                                        | 5        | 98 <sup>th</sup> percentile* (N=479, 2.180Å ± 0.25Å)   |                                |
|                   | Clashscore is the number of serious steric overlaps (> 0.4 Å) per 1000 atoms. |          |                                                        |                                |
| Protein Geometry  | Poor rotamers                                                                 | 0        | 0.00%                                                  | Goal: <0.3%                    |
|                   | Favored rotamers                                                              | 258      | 89.90%                                                 | Goal: >98%                     |
|                   | Ramachandran outliers                                                         | 1        | 0.29%                                                  | Goal: <0.05%                   |
|                   | Ramachandran favored                                                          | 331      | 97.35%                                                 | Goal: >98%                     |
|                   | MolProbity score <sup>^</sup>                                                 | 1.39     | 99 <sup>th</sup> percentile* (N=10453, 2.180Å ± 0.25Å) |                                |
|                   | Cβ deviations >0.25Å                                                          | 0        | 0.00%                                                  | Goal: 0                        |
|                   | Bad bonds:                                                                    | 0 / 2767 | 0.00%                                                  | Goal: 0%                       |
| Bad angles:       | 0 / 3740                                                                      | 0.00%    | Goal: <0.1%                                            |                                |
| Peptide Omegas    | Cis Prolines:                                                                 | 1 / 15   | 6.67%                                                  | Expected: ≤1 per chain, or ≤5% |

In the two column results, the left column gives the raw count, right column gives the percentage.

\* 100<sup>th</sup> percentile is the best among structures of comparable resolution; 0<sup>th</sup> percentile is the worst. For clashscore the comparative set of structures was selected in 2004, for MolProbity score in 2006.

<sup>^</sup> MolProbity score combines the clashscore, rotamer, and Ramachandran evaluations into a single score, normalized to be on the same scale as X-ray resolution.

| #   | Alt Res | High B                 | Clash > 0.4Å | Ramachandran                                 | Rotamer                                              | Cβ deviation       | Bond lengths       | Bond angles        | Cis Peptides        |
|-----|---------|------------------------|--------------|----------------------------------------------|------------------------------------------------------|--------------------|--------------------|--------------------|---------------------|
|     |         | Avg: Clashscore: 29.18 | 5            | Outliers: 1 of 340                           | Poor rotamers: 0 of 287                              | Outliers: 0 of 322 | Outliers: 0 of 347 | Outliers: 0 of 347 | Non-Trans: 1 of 345 |
| A 1 | ALA     | 40.25                  | -            | -                                            | -                                                    | 0.03Å              | -                  | -                  | -                   |
| A 2 | VAL     | 34.77                  | -            | Favored (51.87%)<br>Ile or Val / -98.7,124.4 | Favored (47.7%)<br>chi angles: 169.1                 | 0.03Å              | -                  | -                  | -                   |
| A 3 | ASP     | 37.23                  | -            | Favored (36.8%)<br>General / -73.3,157.5     | Favored (17.2%)<br>p0<br>chi angles: 58.4,36.1       | 0.06Å              | -                  | -                  | -                   |
| A 4 | GLN     | 33.95                  | -            | Favored (78.15%)<br>General / -61.6,-35.5    | Favored (73.7%)<br>tp40<br>chi angles: 183,66.5,38.5 | 0.02Å              | -                  | -                  | -                   |

|      |           |                                        |                                                 |                                                                         |       |   |   |   |
|------|-----------|----------------------------------------|-------------------------------------------------|-------------------------------------------------------------------------|-------|---|---|---|
| A 5  | ALA 28.26 | -                                      | Favored<br>(81.75%)<br>General /<br>-59.4,-39.0 | -                                                                       | 0.02Å | - | - | - |
| A 6  | THR 27.42 | 0.76Å<br>HG21 with A<br>49 THR<br>HG21 | Favored<br>(76.84%)<br>General /<br>-69.6,-40.2 | Favored (33.7%) <i>m</i><br>chi angles: 306.2                           | 0.04Å | - | - | - |
| A 7  | LEU 34.01 | -                                      | Favored<br>(90.36%)<br>General /<br>-61.9,-39.0 | Favored (95.5%)<br><i>mt</i><br>chi angles: 294.7,173.5                 | 0.01Å | - | - | - |
| A 8  | ASP 39.26 | -                                      | Favored<br>(99.19%)<br>General /<br>-63.2,-42.4 | Favored (72.9%)<br><i>m-30</i><br>chi angles: 295.1,350.2               | 0.02Å | - | - | - |
| A 9  | LYS 38.44 | -                                      | Favored<br>(89.65%)<br>General /<br>-66.0,-38.9 | Favored (3.7%)<br><i>mttp</i><br>chi angles:<br>298.4,192.8,212.7,90.9  | 0.01Å | - | - | - |
| A 10 | LEU 22.64 | -                                      | Favored<br>(96.09%)<br>General /<br>-63.6,-43.7 | Favored (23%) <i>mt</i><br>chi angles: 281.9,161.4                      | 0.03Å | - | - | - |
| A 11 | GLU 30.15 | 0.85Å<br>OE1 with S<br>241 HOH O       | Favored<br>(97.99%)<br>General /<br>-63.7,-42.3 | Favored (44.6%)<br><i>mm-30</i><br>chi angles:<br>283.3,286.2,351.4     | 0.01Å | - | - | - |
| A 12 | ALA 32.11 | -                                      | Favored<br>(69.68%)<br>General /<br>-69.6,-31.5 | -                                                                       | 0.01Å | - | - | - |
| A 13 | GLY 29.16 | -                                      | Favored<br>(87.25%)<br>Glycine /<br>-67.2,-44.1 | -                                                                       | -     | - | - | - |
| A 14 | PHE 36.26 | -                                      | Favored<br>(75.74%)<br>General /<br>-57.6,-49.6 | Favored (83.2%)<br><i>t80</i><br>chi angles: 177.6,72                   | 0.03Å | - | - | - |
| A 15 | LYS 47.11 | -                                      | Favored<br>(91.21%)<br>General /<br>-64.8,-38.5 | Allowed (0.5%)<br><i>tttm</i><br>chi angles:<br>161.7,197.6,125.7,289.4 | 0.03Å | - | - | - |
| A 16 | LYS 34.29 | -                                      | Favored<br>(83.71%)<br>General /<br>-61.2,-37.6 | Favored (41.3%)<br><i>tttt</i><br>chi angles:<br>168.3,163,165.2,186.2  | 0.02Å | - | - | - |
| A 17 | LEU 36.4  | -                                      | Favored<br>(86.65%)<br>General /<br>-67.2,-40.6 | Favored (51.7%)<br><i>mt</i><br>chi angles: 284.5,167.8                 | 0.02Å | - | - | - |

|          |                |                   |                                 |                                                 |                                                                         |                         |                         |                        |                            |
|----------|----------------|-------------------|---------------------------------|-------------------------------------------------|-------------------------------------------------------------------------|-------------------------|-------------------------|------------------------|----------------------------|
| A<br>18  | GLN 46.73      | -                 |                                 | Favored<br>(81.78%)<br>General /<br>-60.6,-48.4 | Favored (13.2%)<br><i>mm110</i><br>chi angles:<br>308.6,319.1,122.3     | 0.01Å                   | -                       | -                      | -                          |
| A<br>19  | ASP 44.91      | -                 |                                 | Favored<br>(64.44%)<br>General /<br>-68.1,-17.6 | Favored (49.5%)<br><i>m-30</i><br>chi angles: 299,349.3                 | 0.02Å                   | -                       | -                      | -                          |
| A<br>20  | ALA 39.88      | -                 |                                 | Favored<br>(6.18%)<br>General / -81.4,90.2      | -                                                                       | 0.02Å                   | -                       | -                      | -                          |
| <b>#</b> | <b>Alt Res</b> | <b>High<br/>B</b> | <b>Clash &gt;<br/>0.4Å</b>      | <b>Ramachandran</b>                             | <b>Rotamer</b>                                                          | <b>Cβ<br/>deviation</b> | <b>Bond<br/>lengths</b> | <b>Bond<br/>angles</b> | <b>Cis<br/>Peptides</b>    |
|          |                |                   | Avg: Clashscore:<br>29.18       | Outliers: 1 of<br>340                           | Poor rotamers: 0 of<br>287                                              | Outliers: 0 of 322      | Outliers: 0 of 347      | Outliers: 0 of 347     | Non-<br>Trans: 1<br>of 345 |
| A<br>21  | THR 47.52      | -                 |                                 | Favored<br>(67.99%)<br>General /<br>-66.5,-27.7 | Allowed (0.4%) <i>m</i><br>chi angles: 325.3                            | 0.03Å                   | -                       | -                      | -                          |
| A<br>22  | ASP 51.88      | -                 |                                 | -                                               | Allowed (0.4%) <i>p0</i><br>chi angles: 38.8,56.3                       | 0.05Å                   | -                       | -                      | -                          |
| A<br>23  | CSO 41.41      | -                 | 0.55Å<br>OD with A 61<br>LEU O  | -                                               | -                                                                       | 0.06Å                   | -                       | -                      | -                          |
| A<br>24  | LYS 52.53      | -                 |                                 | -                                               | Allowed (1.5%)<br><i>mmtp</i><br>chi angles:<br>321.1,279.3,201.5,103.9 | 0.03Å                   | -                       | -                      | -                          |
| A<br>25  | SER 22.87      | -                 |                                 | Favored<br>(41.18%)<br>General /<br>-72.8,153.2 | Favored (64.1%) <i>p</i><br>chi angles: 72.7                            | 0.01Å                   | -                       | -                      | -                          |
| A<br>26  | LEU 22.74      | -                 |                                 | Favored<br>(76.84%)<br>General /<br>-60.9,-35.5 | Favored (70.6%)<br><i>mt</i><br>chi angles: 299.8,182.7                 | 0.03Å                   | -                       | -                      | -                          |
| A<br>27  | LEU 22.7       | -                 |                                 | Favored<br>(54.64%)<br>General /<br>-55.2,-53.5 | Favored (48.1%) <i>tp</i><br>chi angles: 180,66.4                       | 0.01Å                   | -                       | -                      | -                          |
| A<br>28  | LYS 38.45      | -                 |                                 | Favored<br>(77.85%)<br>General /<br>-58.1,-39.1 | Allowed (0.6%)<br><i>tmtm</i><br>chi angles:<br>203,244.7,176,303.2     | 0.02Å                   | -                       | -                      | -                          |
| A<br>29  | LYS 36.68      | -                 | 0.43Å<br>NZ with S<br>259 HOH O | Favored<br>(73.06%)<br>General /<br>-63.5,-31.8 | Favored (74.7%)<br><i>tttt</i><br>chi angles:<br>191,183.8,182.3,172.7  | 0.01Å                   | -                       | -                      | -                          |
| A<br>30  | TYR 22.74      | -                 |                                 | Favored<br>(9.24%)<br>General /                 | Favored (67.7%)<br><i>m-80</i><br>chi angles: 295.5,292.9               | 0.02Å                   | -                       | -                      | -                          |

|         |           |   |                                                            |                                                                          |       |   |   |   |
|---------|-----------|---|------------------------------------------------------------|--------------------------------------------------------------------------|-------|---|---|---|
| A<br>31 | LEU 26.48 | - | -119.1,-15.2<br>Favored<br>(8.09%)<br>General / -81.3,70.3 | Favored (19%) <i>tp</i><br>chi angles: 190.1,69.1                        | 0.04Å | - | - | - |
| A<br>32 | ASN 32.42 | - | Favored<br>(7.72%)<br>General /<br>-81.1,179.8             | Favored (33.3%)<br><i>p0</i><br>chi angles: 61.7,45.9                    | 0.05Å | - | - | - |
| A<br>33 | ARG 35.82 | - | Favored<br>(82.17%)<br>General /<br>-66.3,-36.1            | Favored (4.1%)<br><i>tpt170</i><br>chi angles:<br>187.1,75.8,214.7,181.9 | 0.04Å | - | - | - |
| A<br>34 | GLU 58.5  | - | Favored<br>(71.26%)<br>General /<br>-63.5,-50.0            | Favored (3.3%)<br><i>mt-10</i><br>chi angles:<br>265,179.4,291.5         | 0.02Å | - | - | - |
| A<br>35 | VAL 29.1  | - | Favored<br>(99.41%)<br>Ile or Val /<br>-61.8,-44.9         | Favored (75.8%) <i>t</i><br>chi angles: 172.7                            | 0.06Å | - | - | - |
| A<br>36 | PHE 29.02 | - | Favored<br>(70.11%)<br>General /<br>-53.6,-45.4            | Favored (80.8%)<br><i>t80</i><br>chi angles: 182.3,74                    | 0.02Å | - | - | - |
| A<br>37 | ASP 34    | - | Favored<br>(57.57%)<br>General /<br>-76.3,-30.3            | Favored (50.9%)<br><i>m-30</i><br>chi angles: 286.6,319.7                | 0.04Å | - | - | - |
| A<br>38 | GLN 35.45 | - | Favored<br>(69.93%)<br>General /<br>-59.3,-32.4            | Favored (19%) <i>mt0</i><br>chi angles:<br>271.1,181.2,280.6             | 0.05Å | - | - | - |
| A<br>39 | CYS 24.02 | - | Favored<br>(11.26%)<br>General /<br>-106.3,-27.0           | Favored (61.5%) <i>m</i><br>chi angles: 300.7                            | 0.01Å | - | - | - |
| A<br>40 | LYS 31.47 | - | Favored<br>(68.98%)<br>General /<br>-63.6,-27.1            | Favored (12.5%)<br><i>pttm</i><br>chi angles:<br>78.2,182.5,191.4,298.2  | 0.04Å | - | - | - |

| # | Alt Res | High B | Clash > 0.4Å | Ramachandran | Rotamer | Cβ deviation | Bond lengths | Bond angles | Cis Peptides |
|---|---------|--------|--------------|--------------|---------|--------------|--------------|-------------|--------------|
|---|---------|--------|--------------|--------------|---------|--------------|--------------|-------------|--------------|

|                  |                |                     |           |           |           |            |
|------------------|----------------|---------------------|-----------|-----------|-----------|------------|
| Avg: Clashscore: | Outliers: 1 of | Poor rotamers: 0 of | Outliers: | Outliers: | Outliers: | Non-Trans: |
| 29.18            | 5              | 340                 | 287       | 0 of 322  | 0 of 347  | 1 of 345   |

|         |           |   |                                                 |                                                         |       |   |   |   |
|---------|-----------|---|-------------------------------------------------|---------------------------------------------------------|-------|---|---|---|
| A<br>41 | SER 33.67 | - | Favored<br>(36.08%)<br>General /<br>-103.0,12.4 | Favored (88.3%) <i>p</i><br>chi angles: 69.4            | 0.04Å | - | - | - |
| A<br>42 | LEU 27.21 | - | Favored<br>(16.8%)<br>General /                 | Favored (46.5%)<br><i>mt</i><br>chi angles: 305.4,173.7 | 0.01Å | - | - | - |

|         |           |                                    |                                                                 |                                                                      |       |   |   |   |
|---------|-----------|------------------------------------|-----------------------------------------------------------------|----------------------------------------------------------------------|-------|---|---|---|
| A<br>43 | LYS 40.26 | -                                  | -91.8,157.6<br>Favored<br>(15.32%)<br>General /<br>-151.0,133.2 | Allowed (0.8%) <i>tttt</i><br>chi angles:<br>203.3,209.8,233.2,192.4 | 0.04Å | - | - | - |
| A<br>44 | THR 22.28 | -                                  | Favored<br>(22.04%)<br>General /<br>-79.5,166.4                 | Favored (40.9%) <i>p</i><br>chi angles: 67.6                         | 0.04Å | - | - | - |
| A<br>45 | ALA 23.89 | -                                  | Favored<br>(79.59%)<br>General /<br>-56.2,-44.3                 | -                                                                    | 0.01Å | - | - | - |
| A<br>46 | LEU 23.16 | -                                  | Favored<br>(26.85%)<br>General / -72.1,-4.1                     | Favored (90.4%)<br><i>mt</i><br>chi angles: 292.5,168.4              | 0.02Å | - | - | - |
| A<br>47 | GLY 23.13 | -                                  | Favored<br>(43.98%)<br>Glycine / 103.7,6.3                      | -                                                                    | -     | - | - | - |
| A<br>48 | ALA 20.07 | -                                  | Favored (36%)<br>General /<br>-76.9,149.8                       | -                                                                    | 0.02Å | - | - | - |
| A<br>49 | THR 21.8  | 0.76Å<br>HG21 with A<br>6 THR HG21 | Favored<br>(20.1%)<br>General /<br>-120.3,162.1                 | Allowed (0.4%) <i>m</i><br>chi angles: 278.8                         | 0.15Å | - | - | - |
| A<br>50 | LEU 18.96 | -                                  | Favored<br>(70.04%)<br>General /<br>-56.1,-37.8                 | Favored (59.3%) <i>tp</i><br>chi angles: 175.6,58.9                  | 0.01Å | - | - | - |
| A<br>51 | LEU 17.87 | 0.73Å<br>H with A 49<br>THR HG22   | Favored<br>(73.96%)<br>General /<br>-59.3,-35.6                 | Favored (46%) <i>tp</i><br>chi angles: 183.9,64                      | 0.01Å | - | - | - |
| A<br>52 | ASP 18.44 | -                                  | Favored<br>(58.69%)<br>General /<br>-66.8,-12.4                 | Favored (60%)<br><i>m-30</i><br>chi angles: 293.3,308.6              | 0.00Å | - | - | - |
| A<br>53 | CYS 13.78 | -                                  | Favored<br>(7.31%)<br>General /<br>-94.5,-45.7                  | Favored (60.9%) <i>m</i><br>chi angles: 301.8                        | 0.02Å | - | - | - |
| A<br>54 | ILE 20.55 | -                                  | Favored<br>(9.92%)<br>Ile or Val /<br>-105.6,-6.1               | Favored (8.4%) <i>pt</i><br>chi angles: 75.5,170.5                   | 0.05Å | - | - | - |
| A<br>55 | GLN 21.44 | -                                  | Favored<br>(76.4%)<br>General /<br>-59.0,-37.2                  | Favored (6.2%) <i>pt0</i><br>chi angles:<br>53,195.7,344.4           | 0.02Å | - | - | - |
| A<br>56 | SER 19.12 | -                                  | Favored<br>(71.88%)<br>General /                                | Favored (46.5%) <i>t</i><br>chi angles: 179.9                        | 0.02Å | - | - | - |

|          |                |                                |                                                                |                                                                     |                         |                     |                     |                    |                     |
|----------|----------------|--------------------------------|----------------------------------------------------------------|---------------------------------------------------------------------|-------------------------|---------------------|---------------------|--------------------|---------------------|
| A<br>57  | GLY 21.84      | -                              | -71.0,-35.1<br>Favored<br>(75.86%)<br>Glycine /<br>-73.6,-23.9 | -                                                                   | -                       | -                   | -                   | -                  | -                   |
| A<br>58  | VAL 27.41      | -                              | Favored<br>(55.61%)<br>Ile or Val /<br>-72.0,-47.4             | Favored (8.8%) <i>t</i><br>chi angles: 161.3                        | 0.07Å                   | -                   | -                   | -                  | -                   |
| A<br>59  | GLU 41.31      | -                              | Favored<br>(77.94%)<br>General /<br>-69.0,-36.5                | Favored (55.3%)<br><i>mm-30</i><br>chi angles:<br>293.2,311.9,301.2 | 0.02Å                   | -                   | -                   | -                  | -                   |
| A<br>60  | ASN 24.27      | -                              | Favored<br>(2.29%)<br>General /<br>-111.3,86.3                 | Favored (57.4%)<br><i>m-40</i><br>chi angles: 298.1,277.7           | 0.03Å                   | -                   | -                   | -                  | -                   |
| <b>#</b> | <b>Alt Res</b> | <b>High B</b>                  | <b>Clash ≥ 0.4Å</b>                                            | <b>Ramachandran</b>                                                 | <b>Rotamer</b>          | <b>Cβ deviation</b> | <b>Bond lengths</b> | <b>Bond angles</b> | <b>Cis Peptides</b> |
|          |                |                                | Avg: Clashscore: 29.18                                         | Outliers: 1 of 340                                                  | Poor rotamers: 0 of 287 | Outliers: 0 of 322  | Outliers: 0 of 347  | Outliers: 0 of 347 | Non-Trans: 1 of 345 |
| A<br>61  | LEU 24.92      | 0.55Å<br>O with A 23<br>CSO OD | Favored<br>(66.16%)<br>General /<br>-63.3,-21.3                | Favored (78.7%)<br><i>mt</i><br>chi angles: 300.4,180.3             | 0.01Å                   | -                   | -                   | -                  | -                   |
| A<br>62  | ASP 41.46      | -                              | Favored<br>(19.2%)<br>General / -81.0,4.5                      | Favored (13.7%)<br><i>p0</i><br>chi angles: 51,348.4                | 0.03Å                   | -                   | -                   | -                  | -                   |
| A<br>63  | SER 24.4       | -                              | Favored<br>(39.59%)<br>General /<br>-53.9,137.2                | Favored (54.9%) <i>m</i><br>chi angles: 300.1                       | 0.06Å                   | -                   | -                   | -                  | -                   |
| A<br>64  | GLY 22.77      | -                              | Favored<br>(41.68%)<br>Glycine /<br>-69.7,-48.6                | -                                                                   | -                       | -                   | -                   | -                  | -                   |
| A<br>65  | VAL 20.86      | -                              | Allowed<br>(0.76%)<br>Ile or Val /<br>-99.0,-69.4              | Favored (33.5%) <i>t</i><br>chi angles: 185.1                       | 0.05Å                   | -                   | -                   | -                  | -                   |
| A<br>66  | GLY 17.72      | -                              | Favored<br>(55.13%)<br>Glycine / 89.5,17.4                     | -                                                                   | -                       | -                   | -                   | -                  | -                   |
| A<br>67  | ILE 15.56      | -                              | Favored<br>(30.6%)<br>Ile or Val /<br>-136.4,145.4             | Favored (12.6%) <i>tt</i><br>chi angles: 199,171                    | 0.04Å                   | -                   | -                   | -                  | -                   |
| A<br>68  | TYR 24.83      | -                              | Favored<br>(31.97%)<br>General /<br>-134.9,162.6               | Favored (96.2%)<br><i>m-80</i><br>chi angles: 297.8,279.9           | 0.05Å                   | -                   | -                   | -                  | -                   |

|         |           |   |                                                  |                                                                     |       |   |   |   |
|---------|-----------|---|--------------------------------------------------|---------------------------------------------------------------------|-------|---|---|---|
| A<br>69 | ALA 15.75 | - | Favored<br>(42.37%)<br>Pre-Pro /<br>-102.1,123.8 | -                                                                   | 0.02Å | - | - | - |
| A<br>70 | PRO 18.76 | - | Favored<br>(5.25%)<br>Trans-Pro /<br>-84.0,-18.5 | Favored (54%)<br><i>Cg_endo</i><br>chi angles:<br>25.7,324.1,31     | 0.02Å | - | - | - |
| A<br>71 | ASP 18.85 | - | Favored<br>(8.12%)<br>General /<br>-160.0,-179.8 | Favored (26.3%)<br><i>p0</i><br>chi angles: 61.2,29.7               | 0.06Å | - | - | - |
| A<br>72 | ALA 18.05 | - | Favored<br>(82.53%)<br>General /<br>-67.7,-42.2  | -                                                                   | 0.03Å | - | - | - |
| A<br>73 | GLU 23.69 | - | Favored<br>(67.95%)<br>General /<br>-65.8,-27.0  | Favored (40.4%)<br><i>tt0</i><br>chi angles:<br>181.5,194,337.4     | 0.03Å | - | - | - |
| A<br>74 | ALA 14.04 | - | Favored<br>(63.42%)<br>General /<br>-55.3,-33.5  | -                                                                   | 0.02Å | - | - | - |
| A<br>75 | TYR 16.19 | - | Favored<br>(93.03%)<br>General /<br>-60.7,-40.6  | Favored (11.9%)<br><i>m-80</i><br>chi angles: 273.5,298.7           | 0.03Å | - | - | - |
| A<br>76 | THR 19.86 | - | Favored<br>(12.09%)<br>General /<br>-82.1,-47.8  | Favored (85.4%) <i>m</i><br>chi angles: 301.6                       | 0.04Å | - | - | - |
| A<br>77 | LEU 17.94 | - | Favored<br>(98.5%)<br>General /<br>-61.4,-43.6   | Favored (25.1%) <i>tp</i><br>chi angles: 188.9,59.1                 | 0.02Å | - | - | - |
| A<br>78 | PHE 19.17 | - | Favored<br>(6.55%)<br>General / -98.8,25.5       | Favored (83.9%)<br><i>m-80</i><br>chi angles: 299.6,284.8           | 0.04Å | - | - | - |
| A<br>79 | ALA 15.76 | - | Favored<br>(5.57%)<br>Pre-Pro /<br>-46.8,-35.6   | -                                                                   | 0.03Å | - | - | - |
| A<br>80 | PRO 17.54 | - | Favored<br>(76.6%)<br>Trans-Pro /<br>-58.2,-26.4 | Favored (49.1%)<br><i>Cg_exo</i><br>chi angles:<br>327.7,39.2,329.6 | 0.03Å | - | - | - |

# Alt Res High B Clash > 0.4Å Ramachandran Rotamer Cβ deviation Bond lengths Bond angles Cis Peptides

Avg: Clashscore: 29.18    Outliers: 1 of 340    Poor rotamers: 0 of 287    Outliers: 0 of 322    Outliers: 0 of 347    Outliers: 0 of 347    Non-Trans: 1 of 345

|         |     |       |                                  |                                                    |                                                                     |       |   |   |   |
|---------|-----|-------|----------------------------------|----------------------------------------------------|---------------------------------------------------------------------|-------|---|---|---|
| A<br>81 | ILE | 16.22 | -                                | Favored<br>(6.86%)<br>Ile or Val /<br>-99.7,-38.6  | Favored (6%) <i>tp</i><br>chi angles: 183.2,57.7                    | 0.11Å | - | - | - |
| A<br>82 | PHE | 15.49 | -                                | Favored<br>(97.85%)<br>General /<br>-63.7,-42.5    | Favored (25.8%)<br><i>m-80</i><br>chi angles: 278.3,291.4           | 0.01Å | - | - | - |
| A<br>83 | ASN | 15.39 | -                                | Favored<br>(87.84%)<br>Pre-Pro /<br>-58.6,-50.5    | Favored (62.5%)<br><i>m-40</i><br>chi angles: 282.2,357.9           | 0.07Å | - | - | - |
| A<br>84 | PRO | 15.78 | -                                | Favored<br>(26.85%)<br>Trans-Pro /<br>-67.3,-34.5  | Favored (51.2%)<br><i>Cg_endo</i><br>chi angles:<br>25.3,321.8,35.6 | 0.02Å | - | - | - |
| A<br>85 | ILE | 16.8  | -                                | Favored<br>(96.75%)<br>Ile or Val /<br>-63.1,-46.2 | Favored (76.6%)<br><i>mt</i><br>chi angles: 291.9,174.5             | 0.07Å | - | - | - |
| A<br>86 | ILE | 17.63 | -                                | Favored<br>(93.4%)<br>Ile or Val /<br>-60.0,-43.8  | Favored (37.1%)<br><i>mt</i><br>chi angles: 284.2,168.6             | 0.07Å | - | - | - |
| A<br>87 | GLU | 24.78 | -                                | Favored<br>(91.45%)<br>General /<br>-61.2,-46.2    | Favored (21.4%)<br><i>tm-30</i><br>chi angles:<br>185.5,282.5,331.9 | 0.00Å | - | - | - |
| A<br>88 | ASP | 23.23 | -                                | Favored<br>(36.72%)<br>General /<br>-63.7,-54.4    | Favored (30.1%) <i>t0</i><br>chi angles: 188.4,320.9                | 0.04Å | - | - | - |
| A<br>89 | TYR | 23.36 | -                                | Favored<br>(89.46%)<br>General /<br>-59.0,-45.9    | Favored (88.7%)<br><i>t80</i><br>chi angles: 179.9,80.1             | 0.04Å | - | - | - |
| A<br>90 | HIS | 24.51 | -                                | Favored<br>(6.88%)<br>General / -88.1,15.9         | Favored (95.7%)<br><i>m-70</i><br>chi angles: 296.3,281             | 0.04Å | - | - | - |
| A<br>91 | GLU | 42.37 | -                                | Allowed (0.2%)<br>General / 48.5,73.8              | Favored (68.9%)<br><i>mt-10</i><br>chi angles:<br>283.7,169.3,16.9  | 0.04Å | - | - | - |
| A<br>92 | GLY | 25.3  | -                                | Favored<br>(44.89%)<br>Glycine / 104.2,3.4         | -                                                                   | -     | - | - | - |
| A<br>93 | PHE | 22.73 | -                                | Favored<br>(8.03%)<br>General / -84.7,91.8         | Favored (41.5%)<br><i>t80</i><br>chi angles: 192.7,84.1             | 0.04Å | - | - | - |
| A<br>94 | LYS | 42.73 | 0.49Å<br>HE2 with S<br>134 HOH O | Favored<br>(58.07%)<br>Pre-Pro /                   | Allowed (1.5%)<br><i>mttm</i><br>chi angles:                        | 0.03Å | - | - | - |



|     |         |            |                                  |                    |                           |                      |                                     |                    |                     |   |   |
|-----|---------|------------|----------------------------------|--------------------|---------------------------|----------------------|-------------------------------------|--------------------|---------------------|---|---|
| A   | PRO     | 20.05      | -                                | -77.4,164.5        | 325.2,222.9,174.2,278.8   | Favored (99%)        | <i>Cg_exo</i>                       | 0.02Å              | -                   | - | - |
| 95  |         |            |                                  | (81.46%)           |                           | Trans-Pro /          | chi angles:                         |                    |                     |   |   |
|     |         |            |                                  | -55.7,-31.8        |                           |                      | 332.3,35.2,332                      |                    |                     |   |   |
| A   | THR     | 25.16      | -                                | Favored (58.16%)   | Favored (47.1%) <i>p</i>  | General / -89.8,-2.1 | chi angles: 55.7                    | 0.04Å              | -                   | - | - |
| 96  |         |            |                                  |                    |                           |                      |                                     |                    |                     |   |   |
| A   | ASP     | 21.06      | 0.57Å<br>OD1 with S<br>243 HOH O | Favored (32.04%)   | Favored (66.4%)           | General /            | <i>m-30</i>                         | 0.01Å              | -                   | - | - |
| 97  |         |            |                                  | (37.72%)           |                           | -74.6,159.5          | chi angles: 279.9,345               |                    |                     |   |   |
| A   | LYS     | 33.13      | -                                | Favored (37.72%)   | Favored (70.9%)           | General /            | <i>tttt</i>                         | 0.04Å              | -                   | - | - |
| 98  |         |            |                                  | (45.26%)           |                           | -136.8,135.2         | chi angles: 183.1,179.9,164.9,181.7 |                    |                     |   |   |
| A   | HIS     | 19.07      | -                                | Favored (45.26%)   | Favored (83%) <i>t70</i>  | Pre-Pro /            | chi angles: 182.5,78.6              | 0.03Å              | -                   | - | - |
| 99  |         |            |                                  | (34.41%)           |                           | -82.2,139.2          |                                     |                    |                     |   |   |
| A   | PRO     | 19.52      | -                                | Favored (34.41%)   | Favored (36.5%)           | Trans-Pro /          | <i>Cg_endo</i>                      | 0.04Å              | -                   | - | - |
| 100 |         |            |                                  | (34.41%)           |                           | -68.5,164.1          | chi angles: 22.6,323.9,34.8         |                    |                     |   |   |
| #   | Alt Res | High B     | Clash > 0.4Å                     | Ramachandran       | Rotamer                   | Cβ deviation         | Bond lengths                        | Bond angles        | Cis Peptides        |   |   |
|     |         | Avg: 29.18 | Clashscore: 5                    | Outliers: 1 of 340 | Poor rotamers: 0 of 287   | Outliers: 0 of 322   | Outliers: 0 of 347                  | Outliers: 0 of 347 | Non-Trans: 1 of 345 |   |   |
| A   | PRO     | 23.66      | -                                | Favored (76.08%)   | Favored (8.8%)            | Trans-Pro /          | <i>Cg_exo</i>                       | 0.03Å              | -                   | - | - |
| 101 |         |            |                                  | (35.63%)           |                           | -65.1,153.9          | chi angles: 347.8,25.3,332.4        |                    |                     |   |   |
| A   | THR     | 22.28      | -                                | Favored (35.63%)   | Favored (88.8%) <i>m</i>  | General /            | chi angles: 298.4                   | 0.06Å              | -                   | - | - |
| 102 |         |            |                                  | (3.03%)            |                           | -54.0,129.8          |                                     |                    |                     |   |   |
| A   | ASP     | 27.09      | -                                | Favored (3.03%)    | Favored (20.6%) <i>t0</i> | General /            | chi angles: 177.7,30.1              | 0.01Å              | -                   | - | - |
| 103 |         |            |                                  | (56.83%)           |                           | -152.7,106.0         |                                     |                    |                     |   |   |
| A   | PHE     | 25.19      | -                                | Favored (56.83%)   | Favored (71.3%)           | General / -77.5,-7.8 | chi angles: 298.7,291.6             | 0.01Å              | -                   | - | - |
| 104 |         |            |                                  | (50.52%)           |                           |                      |                                     |                    |                     |   |   |
| A   | GLY     | 23.67      | -                                | Favored (50.52%)   | -                         | Glycine /            | -                                   | -                  | -                   | - | - |
| 105 |         |            |                                  | (13.43%)           |                           | 71.9,-169.6          |                                     |                    |                     |   |   |
| A   | ASP     | 37.86      | -                                | Favored (13.43%)   | Favored (61.9%) <i>t0</i> | General /            | chi angles: 182.5,2.7               | 0.04Å              | -                   | - | - |
| 106 |         |            |                                  | (13.43%)           |                           | -90.2,100.6          |                                     |                    |                     |   |   |

|          |           |                                        |                                                     |                                                                     |       |   |   |   |
|----------|-----------|----------------------------------------|-----------------------------------------------------|---------------------------------------------------------------------|-------|---|---|---|
| A<br>107 | ILE 40.65 | 0.43Å<br>HG12 with A<br>244 GLN<br>HB2 | Favored<br>(19.12%)<br>Ile or Val /<br>-56.2,-25.1  | Favored (4.4%) <i>tp</i><br>chi angles: 188.3,52.8                  | 0.08Å | - | - | - |
| A<br>108 | ASN 48.44 | -                                      | Favored<br>(59.22%)<br>General /<br>-72.5,-10.0     | Favored (78.9%)<br><i>m-40</i><br>chi angles: 283.4,330.1           | 0.01Å | - | - | - |
| A<br>109 | THR 27.18 | -                                      | Favored<br>(57.56%)<br>General / -89.9,-4.3         | Favored (71.4%) <i>p</i><br>chi angles: 61.9                        | 0.03Å | - | - | - |
| A<br>110 | ILE 23.84 | -                                      | Favored<br>(19.08%)<br>Ile or Val /<br>-90.6,138.6  | Favored (35.3%)<br><i>mm</i><br>chi angles: 306.7,296.6             | 0.05Å | - | - | - |
| A<br>111 | VAL 22.51 | -                                      | Favored<br>(19.59%)<br>Ile or Val /<br>-125.2,167.3 | Favored (11.4%) <i>m</i><br>chi angles: 306.4                       | 0.02Å | - | - | - |
| A<br>112 | ASN 27.38 | -                                      | Favored<br>(10.17%)<br>General /<br>-69.8,116.4     | Favored (48.2%) <i>t0</i><br>chi angles: 188.3,318.3                | 0.07Å | - | - | - |
| A<br>113 | VAL 23.06 | -                                      | Favored<br>(17.99%)<br>Ile or Val /<br>-72.5,-16.1  | Favored (13.6%) <i>m</i><br>chi angles: 291.4                       | 0.03Å | - | - | - |
| A<br>114 | ASP 24.46 | -                                      | Favored<br>(5.84%)<br>Pre-Pro /<br>-152.4,80.3      | Favored (38.2%) <i>t0</i><br>chi angles: 180,19.1                   | 0.00Å | - | - | - |
| A<br>115 | PRO 28.58 | -                                      | Favored<br>(98.24%)<br>Trans-Pro /<br>-58.4,-33.9   | Favored (85.2%)<br><i>Cg_exo</i><br>chi angles:<br>334,33.4,333.1   | 0.02Å | - | - | - |
| A<br>116 | SER 33.17 | -                                      | Favored<br>(59.89%)<br>General /<br>-78.1,-11.1     | Favored (82.6%) <i>p</i><br>chi angles: 62.3                        | 0.02Å | - | - | - |
| A<br>117 | GLY 26.79 | -                                      | Favored<br>(69.54%)<br>Glycine / 64.3,25.0          | -                                                                   | -     | - | - | - |
| A<br>118 | LYS 29.1  | -                                      | Favored<br>(46.66%)<br>General /<br>-78.4,-28.2     | Favored (46%) <i>tttt</i><br>chi angles:<br>200.2,178.4,167.8,172.2 | 0.07Å | - | - | - |
| A<br>119 | TYR 29.11 | 0.46Å<br>CE1 with A<br>353 GLU<br>HG2  | Allowed<br>(1.59%)<br>General /<br>-126.1,-48.6     | Favored (80%)<br><i>m-80</i><br>chi angles: 300.1,286.3             | 0.03Å | - | - | - |
| A<br>120 | VAL 21.88 | -                                      | Favored<br>(30.16%)                                 | Favored (73%) <i>t</i><br>chi angles: 172.5                         | 0.05Å | - | - | - |

| #     | Alt Res | High B     | Clash > 0.4Å                     | Ile or Val /<br>-83.2,118.0                     | Ramachandran                                                               | Rotamer            | Cβ deviation       | Bond lengths       | Bond angles         | Cis Peptides |
|-------|---------|------------|----------------------------------|-------------------------------------------------|----------------------------------------------------------------------------|--------------------|--------------------|--------------------|---------------------|--------------|
|       |         | Avg: 29.18 | Clashscore: 5                    | Outliers: 1 of 340                              | Poor rotamers: 0 of 287                                                    | Outliers: 0 of 322 | Outliers: 0 of 347 | Outliers: 0 of 347 | Non-Trans: 1 of 345 |              |
| A 121 | VAL     | 23.24      | -                                | Favored (45.43%)<br>Ile or Val /<br>-74.9,-43.8 | Favored (85.7%) <i>t</i><br>chi angles: 177.4                              | 0.06Å              | -                  | -                  | -                   |              |
| A 122 | SER     | 22.83      | -                                | Favored (26.15%)<br>General /<br>-161.1,157.5   | Favored (62.7%) <i>p</i><br>chi angles: 58.1                               | 0.03Å              | -                  | -                  | -                   |              |
| A 123 | THR     | 20.44      | -                                | Favored (50.95%)<br>General /<br>-126.8,144.4   | Favored (91.3%) <i>m</i><br>chi angles: 301.1                              | 0.05Å              | -                  | -                  | -                   |              |
| A 124 | HIS     | 29.22      | 0.56Å<br>ND1 with S<br>166 HOH O | Favored (41.03%)<br>General /<br>-135.8,136.8   | Favored (22.9%)<br><i>m90</i><br>chi angles: 278.4,66.3                    | 0.08Å              | -                  | -                  | -                   |              |
| A 125 | VAL     | 20.3       | -                                | Favored (68.1%)<br>Ile or Val /<br>-128.4,128.2 | Favored (13.7%) <i>t</i><br>chi angles: 188.6                              | 0.05Å              | -                  | -                  | -                   |              |
| A 126 | ARG     | 46.29      | -                                | Favored (50.86%)<br>General /<br>-128.9,142.7   | Allowed (0.5%)<br><i>ttt180</i><br>chi angles:<br>154.9,182.5,126.7,197.6  | 0.02Å              | -                  | -                  | -                   |              |
| A 127 | CYS     | 17.64      | -                                | Favored (9.66%)<br>General /<br>-138.3,175.3    | Favored (27.9%) <i>p</i><br>chi angles: 67.5                               | 0.07Å              | -                  | -                  | -                   |              |
| A 128 | GLY     | 14.89      | -                                | Favored (21.53%)<br>Glycine /<br>-138.2,151.7   | -                                                                          | -                  | -                  | -                  | -                   |              |
| A 129 | ARG     | 15.9       | -                                | Favored (27.85%)<br>General /<br>-145.3,140.5   | Favored (81.1%)<br><i>mmt-90</i><br>chi angles:<br>293.1,295.4,190.8,264.2 | 0.04Å              | -                  | -                  | -                   |              |
| A 130 | SER     | 17.38      | -                                | Favored (37.66%)<br>General /<br>-105.5,141.1   | Favored (58.9%) <i>m</i><br>chi angles: 299.3                              | 0.03Å              | -                  | -                  | -                   |              |
| A 131 | LEU     | 18.66      | -                                | Favored (32.06%)<br>General /<br>-84.6,125.0    | Favored (13.5%)<br><i>mt</i><br>chi angles: 307.4,190.7                    | 0.04Å              | -                  | -                  | -                   |              |

|          |                |               |                                       |                                                   |                                                                     |                     |                     |                    |                     |
|----------|----------------|---------------|---------------------------------------|---------------------------------------------------|---------------------------------------------------------------------|---------------------|---------------------|--------------------|---------------------|
| A        | LYS            | 39.64         | -                                     | Favored<br>(50.66%)<br>General /<br>-55.7,136.3   | Favored (2.8%) <i>tttp</i><br>chi angles:<br>182.2,196.5,212.7,62.2 | 0.02Å               | -                   | -                  | -                   |
| A        | GLY            | 21.9          | -                                     | Favored<br>(59.52%)<br>Glycine / 97.8,-17.0       | -                                                                   | -                   | -                   | -                  | -                   |
| A        | TYR            | 31.19         | -                                     | Favored<br>(32.14%)<br>Pre-Pro /<br>-104.0,146.2  | Favored (93.6%)<br><i>m-80</i><br>chi angles: 291.9,89.2            | 0.06Å               | -                   | -                  | -                   |
| A        | PRO            | 17.54         | -                                     | Favored<br>(4.67%)<br>Trans-Pro /<br>-51.7,158.1  | Favored (13.5%)<br><i>Cg_exo</i><br>chi angles:<br>345.2,21.2,341.4 | 0.05Å               | -                   | -                  | -                   |
| A        | PHE            | 17.83         | -                                     | Favored<br>(8.59%)<br>General /<br>-82.9,177.5    | Favored (5.6%)<br><i>m-10</i><br>chi angles: 296.2,359.6            | 0.04Å               | -                   | -                  | -                   |
| A        | ASN            | 21.19         | 0.41Å<br>HA with A<br>140 LEU<br>HD12 | Favored<br>(3.99%)<br>Pre-Pro /<br>-60.4,-28.1    | Favored (2.1%)<br><i>m-40</i><br>chi angles: 263,271.2              | 0.07Å               | -                   | -                  | -                   |
| A        | PRO            | 17.9          | -                                     | Favored<br>(47.54%)<br>Trans-Pro /<br>-56.0,-24.2 | Favored (94.6%)<br><i>Cg_exo</i><br>chi angles:<br>331.4,35.8,331.4 | 0.04Å               | -                   | -                  | -                   |
| A        | CYS            | 19.46         | -                                     | Favored<br>(4.68%)<br>General / -131.2,8.1        | Favored (62.9%) <i>m</i><br>chi angles: 286                         | 0.02Å               | -                   | -                  | -                   |
| A        | LEU            | 20.42         | 0.41Å<br>HD12 with A<br>137 ASN HA    | Favored<br>(58.22%)<br>General /<br>-66.0,139.1   | Favored (15.8%)<br><i>mt</i><br>chi angles: 280.7,159.3             | 0.01Å               | -                   | -                  | -                   |
| <b>#</b> | <b>Alt Res</b> | <b>High B</b> | <b>Clash &gt; 0.4Å</b>                | <b>Ramachandran</b>                               | <b>Rotamer</b>                                                      | <b>Cβ deviation</b> | <b>Bond lengths</b> | <b>Bond angles</b> | <b>Cis Peptides</b> |
|          |                | Avg: 29.18    | Clashscore: 5                         | Outliers: 1 of 340                                | Poor rotamers: 0 of 287                                             | Outliers: 0 of 322  | Outliers: 0 of 347  | Outliers: 0 of 347 | Non-Trans: 1 of 345 |
| A        | THR            | 20.7          | 0.45Å<br>H with A 144<br>ASN HD22     | Favored<br>(16.64%)<br>General /<br>-86.9,164.3   | Favored (50.3%) <i>p</i><br>chi angles: 65.6                        | 0.02Å               | -                   | -                  | -                   |
| A        | GLU            | 36.54         | -                                     | Favored<br>(75.7%)<br>General /<br>-55.2,-45.8    | Favored (65.4%)<br><i>tt0</i><br>chi angles:<br>179.1,177.3,24.8    | 0.01Å               | -                   | -                  | -                   |
| A        | ALA            | 19.72         | -                                     | Favored<br>(95.76%)<br>General /<br>-61.3,-40.9   | -                                                                   | 0.02Å               | -                   | -                  | -                   |

|          |           |                                    |                                                    |                                                                          |        |   |   |   |
|----------|-----------|------------------------------------|----------------------------------------------------|--------------------------------------------------------------------------|--------|---|---|---|
| A<br>144 | ASN 21.01 | 0.45 Å<br>HD22 with A<br>141 THR H | Favored<br>(72.15%)<br>General /<br>-54.8,-48.9    | Favored (84.2%)<br><i>m-40</i><br>chi angles: 283.3,338.4                | 0.02 Å | - | - | - |
| A<br>145 | TYR 19.41 | -                                  | Favored<br>(86.59%)<br>General /<br>-57.8,-45.2    | Favored (11.2%)<br><i>m-80</i><br>chi angles: 274.1,301.1                | 0.01 Å | - | - | - |
| A<br>146 | LYS 38.34 | -                                  | Favored<br>(76.88%)<br>General /<br>-66.0,-46.7    | Favored (85.4%)<br><i>mttt</i><br>chi angles:<br>299.3,179.6,176.3,168.8 | 0.02 Å | - | - | - |
| A<br>147 | GLU 39.51 | -                                  | Favored<br>(94.72%)<br>General /<br>-65.0,-40.3    | Favored (8.9%) <i>tt0</i><br>chi angles:<br>170.4,200,210.1              | 0.02 Å | - | - | - |
| A<br>148 | MET 22.43 | -                                  | Favored<br>(91.41%)<br>General /<br>-62.0,-45.9    | Favored (46.4%)<br><i>tmm</i><br>chi angles:<br>180.6,182.3,299.7        | 0.01 Å | - | - | - |
| A<br>149 | GLU 26.91 | 0.41 Å<br>O with A 153<br>SER HB3  | Favored<br>(85.65%)<br>General /<br>-58.5,-41.5    | Favored (39.1%)<br><i>tt0</i><br>chi angles:<br>193.3,180.6,26.5         | 0.02 Å | - | - | - |
| A<br>150 | ASP 40.34 | -                                  | Favored<br>(50.48%)<br>General /<br>-55.8,-54.0    | Favored (14.1%) <i>t0</i><br>chi angles: 205.5,9.9                       | 0.03 Å | - | - | - |
| A<br>151 | LYS 42.96 | -                                  | Favored<br>(82.75%)<br>General /<br>-61.9,-47.9    | Allowed (2%) <i>mttt</i><br>chi angles:<br>257.5,149,182.2,162.7         | 0.01 Å | - | - | - |
| A<br>152 | VAL 22.85 | -                                  | Favored<br>(74.63%)<br>Ile or Val /<br>-69.9,-46.1 | Favored (16.4%) <i>t</i><br>chi angles: 163.8                            | 0.09 Å | - | - | - |
| A<br>153 | SER 35.77 | 0.41 Å<br>HB3 with A<br>149 GLU O  | Favored<br>(74.71%)<br>General /<br>-63.0,-33.1    | Allowed (0.3%) <i>t</i><br>chi angles: 147.8                             | 0.03 Å | - | - | - |
| A<br>154 | ALA 29.19 | -                                  | Favored<br>(76.68%)<br>General /<br>-60.5,-49.7    | -                                                                        | 0.03 Å | - | - | - |
| A<br>155 | ILE 37.41 | -                                  | Favored<br>(80.38%)<br>Ile or Val /<br>-56.0,-46.2 | Favored (4.2%)<br><i>mm</i><br>chi angles: 301.5,319                     | 0.04 Å | - | - | - |
| A<br>156 | PHE 27.08 | -                                  | Favored<br>(73.12%)<br>General /<br>-57.2,-38.0    | Favored (14.7%)<br><i>m-10</i><br>chi angles: 286.5,350.8                | 0.02 Å | - | - | - |

| #                                                                                                                                                                       | Alt Res   | High B                            | Clash > 0.4Å | Ramachandran                                  | Rotamer                                                               | Cβ deviation | Bond lengths | Bond angles | Cis Peptides |
|-------------------------------------------------------------------------------------------------------------------------------------------------------------------------|-----------|-----------------------------------|--------------|-----------------------------------------------|-----------------------------------------------------------------------|--------------|--------------|-------------|--------------|
| A 157                                                                                                                                                                   | GLY 34.34 | -                                 | -            | Favored (60.71%)<br>Glycine /<br>-66.4,-13.6  | -                                                                     | -            | -            | -           | -            |
| A 158                                                                                                                                                                   | THR 35.24 | -                                 | -            | Favored (42.73%)<br>General / -96.7,-3.4      | Favored (4.2%) <i>p</i><br>chi angles: 79.7                           | 0.03Å        | -            | -           | -            |
| A 159                                                                                                                                                                   | PHE 30.93 | -                                 | -            | Favored (26.43%)<br>General /<br>-60.8,126.2  | Favored (3.8%)<br><i>m-10</i><br>chi angles: 280.3,340.4              | 0.04Å        | -            | -           | -            |
| A 160                                                                                                                                                                   | GLU 48.63 | 0.65Å<br>O with S 222<br>HOH O    | -            | Favored (3.62%)<br>General /<br>-109.4,-178.7 | Favored (29.4%)<br><i>mt-10</i><br>chi angles:<br>301.9,172.1,251.7   | 0.01Å        | -            | -           | -            |
| <p>Avg: Clashscore: 29.18    Outliers: 1 of 340    Poor rotamers: 0 of 287    Outliers: 0 of 322    Outliers: 0 of 347    Outliers: 0 of 347    Non-Trans: 1 of 345</p> |           |                                   |              |                                               |                                                                       |              |              |             |              |
| A 161                                                                                                                                                                   | GLY 33.18 | -                                 | -            | Favored (48.03%)<br>Glycine /<br>60.6,-140.8  | -                                                                     | -            | -            | -           | -            |
| A 162                                                                                                                                                                   | GLU 34.75 | -                                 | -            | Favored (65.92%)<br>General /<br>-63.3,-20.9  | Favored (17.1%)<br><i>pt0</i><br>chi angles:<br>68.7,173.6,346        | 0.02Å        | -            | -           | -            |
| A 163                                                                                                                                                                   | LEU 27.92 | -                                 | -            | Favored (56.62%)<br>General / -87.5,-8.3      | Favored (50.8%)<br><i>mt</i><br>chi angles: 296.2,184.6               | 0.01Å        | -            | -           | -            |
| A 164                                                                                                                                                                   | LYS 45.76 | -                                 | -            | Favored (57.84%)<br>General /<br>-60.5,139.3  | Allowed (1.6%)<br><i>tttm</i><br>chi angles:<br>202.6,197,165.7,251.6 | 0.02Å        | -            | -           | -            |
| A 165                                                                                                                                                                   | GLY 22.88 | 0.42Å<br>HA3 with A<br>213 ASN HA | -            | Favored (3.98%)<br>Glycine /<br>-179.3,-140.3 | -                                                                     | -            | -            | -           | -            |
| A 166                                                                                                                                                                   | LYS 41.5  | -                                 | -            | Favored (23.98%)<br>General /<br>-145.8,136.1 | Favored (14%) <i>tttt</i><br>chi angles:<br>185.5,166.5,155,154.3     | 0.02Å        | -            | -           | -            |
| A 167                                                                                                                                                                   | TYR 19.14 | -                                 | -            | Favored (33.64%)<br>General /<br>-88.4,135.1  | Favored (68.5%)<br><i>t80</i><br>chi angles: 181.2,67.8               | 0.02Å        | -            | -           | -            |
| A 168                                                                                                                                                                   | TYR 28.09 | -                                 | -            | Favored (43.98%)<br>Pre-Pro /<br>-119.1,106.0 | Favored (34.9%)<br><i>m-80</i><br>chi angles: 304.7,79.9              | 0.06Å        | -            | -           | -            |

|          |           |   |                                                  |                                                                        |       |   |   |   |
|----------|-----------|---|--------------------------------------------------|------------------------------------------------------------------------|-------|---|---|---|
| A<br>169 | PRO 18.45 | - | Favored<br>(82.6%)<br>Trans-Pro /<br>-64.3,143.3 | Favored (2.7%)<br><i>Cg_exo</i><br>chi angles:<br>356.8,17,336.5       | 0.04Å | - | - | - |
| A<br>170 | LEU 17.67 | - | Favored<br>(63.06%)<br>General /<br>-72.0,-28.0  | Favored (3.7%) <i>mp</i><br>chi angles: 262.3,54.4                     | 0.02Å | - | - | - |
| A<br>171 | THR 18.21 | - | Favored<br>(20.27%)<br>General /<br>-67.5,123.4  | Favored (84.9%) <i>m</i><br>chi angles: 301.7                          | 0.03Å | - | - | - |
| A<br>172 | GLY 22.18 | - | Favored<br>(75.78%)<br>Glycine / 71.9,14.0       | -                                                                      | -     | - | - | - |
| A<br>173 | MET 18.79 | - | Favored<br>(48.53%)<br>General /<br>-69.4,134.0  | Favored (62.6%)<br><i>tmm</i><br>chi angles:<br>185.7,181.4,287.6      | 0.02Å | - | - | - |
| A<br>174 | ASP 18.22 | - | Favored<br>(14.22%)<br>General /<br>-92.3,162.6  | Favored (3.1%) <i>p0</i><br>chi angles: 65.8,63.2                      | 0.03Å | - | - | - |
| A<br>175 | LYS 24.23 | - | Favored<br>(72.93%)<br>General /<br>-65.0,-31.6  | Allowed (0.6%)<br><i>tttp</i><br>chi angles:<br>207.2,129.5,160.2,93.3 | 0.02Å | - | - | - |
| A<br>176 | ALA 18.4  | - | Favored<br>(71.84%)<br>General /<br>-69.9,-43.3  | -                                                                      | 0.02Å | - | - | - |
| A<br>177 | THR 19.48 | - | Favored<br>(91.21%)<br>General /<br>-58.9,-43.7  | Favored (65.9%) <i>m</i><br>chi angles: 303.2                          | 0.05Å | - | - | - |
| A<br>178 | GLN 31.69 | - | Favored<br>(67.43%)<br>General /<br>-54.3,-50.4  | Allowed (0.4%) <i>tt0</i><br>chi angles:<br>231.4,158.8,13.8           | 0.03Å | - | - | - |
| A<br>179 | GLN 28.4  | - | Favored<br>(95.06%)<br>General /<br>-62.7,-44.9  | Favored (66.6%)<br><i>tp40</i><br>chi angles:<br>194.7,55.4,56.5       | 0.02Å | - | - | - |
| A<br>180 | GLN 36.78 | - | Favored<br>(74.25%)<br>General /<br>-62.9,-32.9  | Favored (4.8%) <i>pt0</i><br>chi angles:<br>67.1,174.8,251.5           | 0.03Å | - | - | - |

# Alt Res High Clash > Ramachandran Rotamer Cβ Bond Bond Cis  
B 0.4Å deviation lengths angles Peptides

Avg: Clashscore: 29.18    Outliers: 1 of 340    Poor rotamers: 0 of 287    Outliers: 0 of 322    Outliers: 0 of 347    Outliers: 0 of 347    Non-Trans: 1 of 345

|          |           |                                  |                                                    |                                                                         |       |   |   |   |
|----------|-----------|----------------------------------|----------------------------------------------------|-------------------------------------------------------------------------|-------|---|---|---|
| A<br>181 | LEU 19.19 | -                                | Favored<br>(60.14%)<br>General /<br>-74.2,-42.1    | Favored (79.8%)<br><i>mt</i><br>chi angles: 288.8,170.6                 | 0.01Å | - | - | - |
| A<br>182 | ILE 23.19 | -                                | Favored<br>(71.84%)<br>Ile or Val /<br>-54.5,-47.0 | Favored (68.8%)<br><i>mt</i><br>chi angles: 289.6,162.5                 | 0.04Å | - | - | - |
| A<br>183 | ASP 30.5  | 0.78Å<br>OD2 with S<br>191 HOH O | Favored<br>(66.77%)<br>General /<br>-56.5,-34.3    | Favored (91.3%)<br><i>m-30</i><br>chi angles: 287.6,353.3               | 0.02Å | - | - | - |
| A<br>184 | ASP 32.16 | -                                | Favored<br>(59.2%)<br>General / -84.2,-5.1         | Favored (68.1%)<br><i>m-30</i><br>chi angles: 290.4,321.6               | 0.02Å | - | - | - |
| A<br>185 | HIS 35.6  | -                                | Favored<br>(12.66%)<br>General / 62.7,37.7         | Favored (55%)<br><i>m-70</i><br>chi angles: 307.4,268.9                 | 0.06Å | - | - | - |
| A<br>186 | PHE 21.18 | -                                | Favored<br>(15.48%)<br>General /<br>-107.2,-12.0   | Favored (17.2%)<br><i>m-10</i><br>chi angles: 288.8,351                 | 0.03Å | - | - | - |
| A<br>187 | LEU 18.13 | -                                | Favored<br>(27.04%)<br>General /<br>-86.2,145.4    | Favored (8.8%) <i>tp</i><br>chi angles: 193.4,77.1                      | 0.03Å | - | - | - |
| A<br>188 | PHE 18.26 | -                                | Favored<br>(34.42%)<br>General /<br>-120.5,155.0   | Favored (55.7%)<br><i>p90</i><br>chi angles: 65,94.1                    | 0.05Å | - | - | - |
| A<br>189 | LYS 43.15 | -                                | Favored<br>(2.35%)<br>General /<br>-112.9,-173.9   | Favored (4.5%)<br><i>pttm</i><br>chi angles:<br>51.2,205.6,177.9,309.2  | 0.04Å | - | - | - |
| A<br>190 | GLU 36.48 | -                                | Favored<br>(41.79%)<br>General /<br>-58.1,143.9    | Allowed (0.3%)<br><i>mt-10</i><br>chi angles:<br>241,203.4,304          | 0.02Å | - | - | - |
| A<br>191 | GLY 22.13 | -                                | Favored<br>(53.18%)<br>Glycine /<br>-69.8,159.8    | -                                                                       | -     | - | - | - |
| A<br>192 | ASP 26.76 | -                                | Favored<br>(5.21%)<br>General /<br>-75.8,179.9     | Favored (47.3%)<br><i>p0</i><br>chi angles: 61.4,17.6                   | 0.03Å | - | - | - |
| A<br>193 | ARG 24.3  | -                                | Favored<br>(63.24%)<br>General /<br>-56.4,-30.8    | Favored (39.1%)<br><i>ptt90</i><br>chi angles:<br>59.7,187.5,166.6,87.8 | 0.02Å | - | - | - |
| A<br>194 | PHE 27.91 | -                                | Favored<br>(82.78%)                                | Favored (93.3%)<br><i>m-80</i>                                          | 0.02Å | - | - | - |



|          |                |               |                        |                          |                                        |                     |                     |                    |                     |                           |  |  |
|----------|----------------|---------------|------------------------|--------------------------|----------------------------------------|---------------------|---------------------|--------------------|---------------------|---------------------------|--|--|
| A        | LEU            | 24.28         | -                      | General /<br>-66.5,-44.4 | chi angles: 298.9,280                  |                     |                     |                    |                     |                           |  |  |
| 195      |                |               |                        | Favored<br>(80.82%)      | Favored (36.3%)<br><i>mt</i>           | 0.01Å               | -                   | -                  | -                   |                           |  |  |
|          |                |               |                        | General /<br>-68.7,-38.9 | chi angles: 293,184.9                  |                     |                     |                    |                     |                           |  |  |
| A        | GLN            | 26.01         | -                      | Favored<br>(81.47%)      | Favored (47.9%)<br><i>mm-40</i>        | 0.01Å               | -                   | -                  | -                   |                           |  |  |
| 196      |                |               |                        | General /<br>-59.8,-48.5 | chi angles:<br>299.8,280.5,335.4       |                     |                     |                    |                     |                           |  |  |
| A        | ALA            | 19.87         | -                      | Favored<br>(64.34%)      | -                                      | 0.03Å               | -                   | -                  | -                   |                           |  |  |
| 197      |                |               |                        | General /<br>-68.7,-19.3 |                                        |                     |                     |                    |                     |                           |  |  |
| A        | ALA            | 15.76         | -                      | Favored<br>(36.38%)      | -                                      | 0.01Å               | -                   | -                  | -                   |                           |  |  |
| 198      |                |               |                        | General / -83.7,2.7      |                                        |                     |                     |                    |                     |                           |  |  |
| A        | ASN            | 24.14         | -                      | Favored<br>(15.86%)      | Favored (50.2%)<br><i>m-40</i>         | 0.04Å               | -                   | -                  | -                   |                           |  |  |
| 199      |                |               |                        | General / 63.0,27.3      | chi angles: 277.4,351.4                |                     |                     |                    |                     |                           |  |  |
| A        | ALA            | 19.31         | -                      | Favored<br>(49.14%)      | -                                      | 0.02Å               | -                   | -                  | -                   |                           |  |  |
| 200      |                |               |                        | General / -91.5,5.5      |                                        |                     |                     |                    |                     |                           |  |  |
| <b>#</b> | <b>Alt Res</b> | <b>High B</b> | <b>Clash &gt; 0.4Å</b> | <b>Ramachandran</b>      | <b>Rotamer</b>                         | <b>Cβ deviation</b> | <b>Bond lengths</b> | <b>Bond angles</b> | <b>Cis Peptides</b> |                           |  |  |
|          |                |               | Avg: Clashscore: 29.18 | Outliers: 1 of 340       | Poor rotamers: 0 of 287                | Outliers: 0 of 322  | Outliers: 0 of 347  | Outliers: 0 of 347 | Non-Trans: 1 of 345 |                           |  |  |
| A        | CYS            | 24.02         | -                      | Favored<br>(9.42%)       | Favored (55.5%) <i>m</i>               | 0.04Å               | -                   | -                  | -                   |                           |  |  |
| 201      |                |               |                        | General /<br>-123.6,20.5 | chi angles: 302.4                      |                     |                     |                    |                     |                           |  |  |
| A        | ARG            | 23.37         | -                      | Favored<br>(43.46%)      | Favored (24.3%)<br><i>mtm110</i>       | 0.02Å               | -                   | -                  | -                   |                           |  |  |
| 202      |                |               |                        | General /<br>-72.0,151.2 | chi angles:<br>299.3,165.5,298.3,103.8 |                     |                     |                    |                     |                           |  |  |
| A        | TYR            | 32.19         | -                      | Favored<br>(13.48%)      | Favored (65.7%)<br><i>m-80</i>         | 0.04Å               | -                   | -                  | -                   |                           |  |  |
| 203      |                |               |                        | General / 62.8,22.6      | chi angles: 299.9,293.2                |                     |                     |                    |                     |                           |  |  |
| A        | TRP            | 23.94         | -                      | Favored<br>(90.32%)      | Favored (32.8%)<br><i>t-100</i>        | 0.04Å               | -                   | -                  | -                   |                           |  |  |
| 204      |                |               |                        | Pre-Pro /<br>-60.3,132.4 | chi angles: 190.2,274.7                |                     |                     |                    |                     |                           |  |  |
| A        | PRO            | 16.9          | -                      | Favored<br>(10.46%)      | Favored (17.3%)<br><i>Cg_endo</i>      | 0.04Å               | -                   | -                  | -                   | Cis PRO<br>omega=<br>4.29 |  |  |
| 205      |                |               |                        | Cis-Pro /<br>-104.9,24.2 | chi angles:<br>37.3,328.9,12.6         |                     |                     |                    |                     |                           |  |  |
| A        | THR            | 22.08         | -                      | Favored<br>(22.08%)      | Favored (15.7%) <i>m</i>               | 0.05Å               | -                   | -                  | -                   |                           |  |  |
| 206      |                |               |                        | General /<br>-53.8,126.4 | chi angles: 310                        |                     |                     |                    |                     |                           |  |  |

|          |           |                                      |                                                     |                                                                          |       |   |   |   |
|----------|-----------|--------------------------------------|-----------------------------------------------------|--------------------------------------------------------------------------|-------|---|---|---|
| A<br>207 | GLY 14.53 | -                                    | Favored<br>(89.65%)<br>Glycine / 80.5,2.6           | -                                                                        | -     | - | - | - |
| A<br>208 | ARG 16.94 | -                                    | Favored<br>(34.66%)<br>General /<br>-102.7,141.9    | Favored (2.2%)<br><i>mpt180</i><br>chi angles:<br>280.7,65.2,160.7,216.6 | 0.02Å | - | - | - |
| A<br>209 | GLY 12.59 | -                                    | Favored<br>(45.32%)<br>Glycine /<br>-173.5,172.6    | -                                                                        | -     | - | - | - |
| A<br>210 | ILE 18.01 | -                                    | Favored<br>(48.93%)<br>Ile or Val /<br>-136.2,131.3 | Favored (6.3%) <i>mt</i><br>chi angles: 292.8,147.8                      | 0.04Å | - | - | - |
| A<br>211 | TYR 25.11 | -                                    | Favored<br>(50.45%)<br>General /<br>-120.3,141.0    | Favored (60.4%)<br><i>t80</i><br>chi angles: 180,272.1                   | 0.02Å | - | - | - |
| A<br>212 | HIS 22.38 | -                                    | Favored<br>(42.13%)<br>General /<br>-148.1,156.0    | Favored (16.2%)<br><i>p90</i><br>chi angles: 73.3,74                     | 0.09Å | - | - | - |
| A<br>213 | ASN 22.6  | 0.42Å<br>HA with A<br>165 GLY<br>HA3 | Favored<br>(15.8%)<br>General /<br>-89.0,162.9      | Favored (41.9%)<br><i>p0</i><br>chi angles: 65.4,343.2                   | 0.02Å | - | - | - |
| A<br>214 | ASP 38.46 | -                                    | Favored<br>(62.36%)<br>General /<br>-52.3,-40.8     | Favored (46.9%)<br><i>m-30</i><br>chi angles: 303.3,332.4                | 0.01Å | - | - | - |
| A<br>215 | ALA 24.85 | -                                    | Favored<br>(50.05%)<br>General / -75.7,-6.3         | -                                                                        | 0.02Å | - | - | - |
| A<br>216 | LYS 29.27 | -                                    | Favored<br>(29.23%)<br>General / 56.3,41.3          | Favored (91.7%)<br><i>mttt</i><br>chi angles:<br>301.3,185,180.8,175.6   | 0.06Å | - | - | - |
| A<br>217 | THR 22.85 | -                                    | Favored<br>(15.27%)<br>General /<br>-116.8,14.4     | Favored (66.4%) <i>p</i><br>chi angles: 58.4                             | 0.04Å | - | - | - |
| A<br>218 | PHE 21.4  | -                                    | Favored<br>(5.88%)<br>General /<br>-156.5,125.2     | Favored (68.9%)<br><i>t80</i><br>chi angles: 174,68.9                    | 0.02Å | - | - | - |
| A<br>219 | LEU 16.76 | -                                    | Favored<br>(41.26%)<br>General /<br>-136.6,138.5    | Favored (12.7%) <i>tp</i><br>chi angles: 169.8,73.3                      | 0.03Å | - | - | - |
| A<br>220 | VAL 15.33 | -                                    | Favored<br>(70.26%)                                 | Favored (36.5%) <i>t</i><br>chi angles: 184.2                            | 0.03Å | - | - | - |

| #     | Alt Res | High B                 | Clash > 0.4Å                    | Ile or Val /<br>-127.0,132.1                  | Ramachandran                                                         | Rotamer            | Cβ deviation       | Bond lengths       | Bond angles         | Cis Peptides |
|-------|---------|------------------------|---------------------------------|-----------------------------------------------|----------------------------------------------------------------------|--------------------|--------------------|--------------------|---------------------|--------------|
|       |         | Avg: Clashscore: 29.18 | 5                               | Outliers: 1 of 340                            | Poor rotamers: 0 of 287                                              | Outliers: 0 of 322 | Outliers: 0 of 347 | Outliers: 0 of 347 | Non-Trans: 1 of 345 |              |
| A 221 | TRP     | 18.28                  | -                               | Favored (49.97%)<br>General / -102.7,126.8    | Favored (42.9%)<br><i>m-10</i><br>chi angles: 286.3,354.2            | 0.02Å              | -                  | -                  | -                   |              |
| A 222 | VAL     | 14.61                  | -                               | Favored (45.61%)<br>Ile or Val / -99.9,117.8  | Favored (34.6%) <i>t</i><br>chi angles: 184.7                        | 0.04Å              | -                  | -                  | -                   |              |
| A 223 | ASN     | 16.08                  | -                               | Favored (18.01%)<br>General / 61.9,31.9       | Favored (64.7%)<br><i>m-40</i><br>chi angles: 283.2,316.8            | 0.08Å              | -                  | -                  | -                   |              |
| A 224 | GLU     | 24.92                  | -                               | Favored (67.35%)<br>General / -72.9,-36.4     | Favored (12.4%)<br><i>tm-30</i><br>chi angles: 182.8,266.5,335.9     | 0.02Å              | -                  | -                  | -                   |              |
| A 225 | GLU     | 32.32                  | 0.54Å<br>HG3 with A 270 PHE CD2 | Allowed (0.11%)<br>General / -154.8,-58.3     | Favored (2.9%) <i>tt0</i><br>chi angles: 156.7,163.4,341.4           | 0.02Å              | -                  | -                  | -                   |              |
| A 226 | ASP     | 16.26                  | -                               | Favored (17.59%)<br>General / -87.0,162.5     | Favored (16.3%)<br><i>m-30</i><br>chi angles: 281.9,309.1            | 0.04Å              | -                  | -                  | -                   |              |
| A 227 | HIS     | 13.93                  | -                               | Favored (42.34%)<br>General / -49.6,-50.4     | Favored (43.8%)<br><i>m170</i><br>chi angles: 296.8,152.6            | 0.01Å              | -                  | -                  | -                   |              |
| A 228 | LEU     | 13.8                   | -                               | Favored (44.98%)<br>General / -129.3,129.6    | Favored (78.5%)<br><i>mt</i><br>chi angles: 301.7,176.2              | 0.03Å              | -                  | -                  | -                   |              |
| A 229 | ARG     | 41.52                  | 0.76Å<br>NH1 with S 231 HOH O   | Favored (26.55%)<br>General / -113.2,114.3    | Favored (6.5%)<br><i>ttm-80</i><br>chi angles: 184.6,198.5,291.5,241 | 0.01Å              | -                  | -                  | -                   |              |
| A 230 | ILE     | 19.74                  | -                               | Favored (68.16%)<br>Ile or Val / -111.6,124.2 | Favored (11.2%)<br><i>mt</i><br>chi angles: 308.5,157.1              | 0.06Å              | -                  | -                  | -                   |              |
| A 231 | ILE     | 25.98                  | -                               | Favored (50.8%)<br>Ile or Val / -129.9,139.7  | Allowed (0.7%) <i>mt</i><br>chi angles: 312.4,138.4                  | 0.01Å              | -                  | -                  | -                   |              |

|          |                |               |                                        |                                                   |                                                                         |                     |                     |                    |                     |
|----------|----------------|---------------|----------------------------------------|---------------------------------------------------|-------------------------------------------------------------------------|---------------------|---------------------|--------------------|---------------------|
| A<br>232 | SER            | 19.29         | -                                      | Favored<br>(46.09%)<br>General /<br>-129.8,131.2  | Favored (46.5%) <i>t</i><br>chi angles: 179.8                           | 0.03Å               | -                   | -                  | -                   |
| A<br>233 | MET            | 20.09         | -                                      | Favored<br>(41.32%)<br>General /<br>-154.5,162.1  | Allowed (0.4%)<br><i>pmt</i><br>chi angles:<br>68.7,296.4,187.8         | 0.01Å               | -                   | -                  | -                   |
| A<br>234 | GLN            | 22.11         | 0.59Å<br>HG2 with A<br>242 ILE<br>HD11 | Favored<br>(7.32%)<br>General /<br>-171.1,163.9   | Favored (18.6%)<br><i>pt0</i><br>chi angles:<br>60.2,187.9,51.9         | 0.05Å               | -                   | -                  | -                   |
| A<br>235 | LYS            | 43.89         | -                                      | Favored<br>(38.62%)<br>General /<br>-60.0,147.6   | Favored (4.9%)<br><i>mmtm</i><br>chi angles:<br>300.5,291.4,214.9,318.3 | 0.04Å               | -                   | -                  | -                   |
| A<br>236 | GLY            | 19.41         | -                                      | Favored<br>(36.67%)<br>Glycine /<br>84.2,-160.4   | -                                                                       | -                   | -                   | -                  | -                   |
| A<br>237 | GLY            | 19.55         | -                                      | Favored<br>(4.26%)<br>Glycine /<br>-130.2,25.9    | -                                                                       | -                   | -                   | -                  | -                   |
| A<br>238 | ASP            | 26.83         | -                                      | Favored<br>(3.97%)<br>General / -77.4,75.5        | Favored (49.9%) <i>t0</i><br>chi angles: 187.8,2.5                      | 0.05Å               | -                   | -                  | -                   |
| A<br>239 | LEU            | 22.63         | -                                      | Favored<br>(62.73%)<br>General /<br>-55.0,-33.8   | Favored (32.5%) <i>tp</i><br>chi angles: 186.7,58                       | 0.02Å               | -                   | -                  | -                   |
| A<br>240 | LYS            | 38.93         | -                                      | Favored<br>(5.34%)<br>General /<br>-61.2,-59.4    | Favored (33.2%)<br><i>tttt</i><br>chi angles:<br>170.5,166.3,194,162.8  | 0.00Å               | -                   | -                  | -                   |
| <b>#</b> | <b>Alt Res</b> | <b>High B</b> | <b>Clash &gt; 0.4Å</b>                 | <b>Ramachandran</b>                               | <b>Rotamer</b>                                                          | <b>Cβ deviation</b> | <b>Bond lengths</b> | <b>Bond angles</b> | <b>Cis Peptides</b> |
|          |                | Avg: 29.18    | Clashscore: 5                          | Outliers: 1 of 340                                | Poor rotamers: 0 of 287                                                 | Outliers: 0 of 322  | Outliers: 0 of 347  | Outliers: 0 of 347 | Non-Trans: 1 of 345 |
| A<br>241 | THR            | 26.7          | -                                      | Favored<br>(74.76%)<br>General /<br>-57.1,-39.4   | Favored (81.6%) <i>m</i><br>chi angles: 296.5                           | 0.05Å               | -                   | -                  | -                   |
| A<br>242 | ILE            | 21.78         | 0.59Å<br>HD11 with A<br>234 GLN<br>HG2 | Favored<br>(75.1%)<br>Ile or Val /<br>-65.5,-49.9 | Favored (7.6%) <i>mt</i><br>chi angles: 283.9,153                       | 0.07Å               | -                   | -                  | -                   |
| A<br>243 | PHE            | 21.66         | -                                      | Favored<br>(90.56%)<br>General /<br>-65.3,-43.6   | Favored (10.3%)<br><i>t80</i><br>chi angles: 184.3,38.5                 | 0.03Å               | -                   | -                  | -                   |

|          |           |                                        |                                                    |                                                                          |       |   |   |   |
|----------|-----------|----------------------------------------|----------------------------------------------------|--------------------------------------------------------------------------|-------|---|---|---|
| A<br>244 | GLN 40.16 | 0.43Å<br>HB2 with A<br>107 ILE<br>HG12 | Favored<br>(93.31%)<br>General /<br>-60.3,-41.5    | Favored (25.9%)<br><i>tp40</i><br>chi angles:<br>179.3,70.7,86.1         | 0.02Å | - | - | - |
| A<br>245 | ARG 27.04 | -                                      | Favored<br>(79.48%)<br>General /<br>-60.6,-36.8    | Favored (12.9%)<br><i>ttm110</i><br>chi angles:<br>171.4,188.2,316,129.9 | 0.01Å | - | - | - |
| A<br>246 | LEU 21.8  | -                                      | Favored<br>(69.02%)<br>General /<br>-68.1,-47.1    | Favored (31.7%) <i>tp</i><br>chi angles: 181.3,69.7                      | 0.02Å | - | - | - |
| A<br>247 | VAL 27.91 | -                                      | Favored<br>(75.19%)<br>Ile or Val /<br>-66.4,-35.6 | Allowed (1.8%) <i>p</i><br>chi angles: 53.4                              | 0.11Å | - | - | - |
| A<br>248 | ASN 35.81 | -                                      | Favored<br>(89.46%)<br>General /<br>-58.5,-44.6    | Favored (80%)<br><i>m-40</i><br>chi angles: 289.7,352.2                  | 0.02Å | - | - | - |
| A<br>249 | ALA 24.42 | -                                      | Favored<br>(73.6%)<br>General /<br>-64.6,-48.8     | -                                                                        | 0.03Å | - | - | - |
| A<br>250 | VAL 22.8  | -                                      | Favored<br>(82.84%)<br>Ile or Val /<br>-57.0,-47.7 | Favored (60.1%) <i>t</i><br>chi angles: 170.8                            | 0.06Å | - | - | - |
| A<br>251 | ASN 25.21 | -                                      | Favored<br>(91.76%)<br>General /<br>-61.1,-46.1    | Favored (99%)<br><i>m-40</i><br>chi angles: 287.6,337.9                  | 0.01Å | - | - | - |
| A<br>252 | THR 27.64 | -                                      | Favored<br>(61.92%)<br>General /<br>-53.0,-51.3    | Favored (32%) <i>m</i><br>chi angles: 306.5                              | 0.04Å | - | - | - |
| A<br>253 | ILE 22.89 | -                                      | Favored<br>(93.3%)<br>Ile or Val /<br>-60.9,-47.5  | Favored (71%) <i>mt</i><br>chi angles: 299.1,164.4                       | 0.05Å | - | - | - |
| A<br>254 | GLU 27.27 | 0.50Å<br>OE2 with S<br>21 HOH O        | Favored<br>(74.56%)<br>General /<br>-56.8,-39.6    | Favored (38.7%)<br><i>tt0</i><br>chi angles:<br>180.7,168.2,221.9        | 0.02Å | - | - | - |
| A<br>255 | SER 36.84 | -                                      | Favored<br>(24.26%)<br>General /<br>-52.9,-28.6    | Allowed (1.2%) <i>p</i><br>chi angles: 91.3                              | 0.04Å | - | - | - |
| A<br>256 | LYS 41.6  | -                                      | Favored<br>(15.54%)<br>General /<br>-107.6,-10.9   | Favored (11%)<br><i>mmtp</i><br>chi angles:<br>305.6,279.7,168.8,80.1    | 0.01Å | - | - | - |

| #     | Alt Res   | High B           | Clash > 0.4Å   | Ramachandran                                  | Rotamer                                                                  | Cβ deviation | Bond lengths | Bond angles  | Cis Peptides |
|-------|-----------|------------------|----------------|-----------------------------------------------|--------------------------------------------------------------------------|--------------|--------------|--------------|--------------|
| A 257 | LEU 35.32 | -                |                | Favored (2.3%)<br>Pre-Pro /<br>-154.9,104.6   | Allowed (0.9%) <i>tp</i><br>chi angles: 221.3,42                         | 0.03Å        | -            | -            | -            |
| A 258 | PRO 27.87 | -                |                | Favored (59.9%)<br>Trans-Pro /<br>-70.5,148.4 | Favored (5.2%)<br><i>Cg_exo</i><br>chi angles:<br>350.8,25.1,329.5       | 0.04Å        | -            | -            | -            |
| A 259 | PHE 20.11 | -                |                | Favored (19.06%)<br>General /<br>-96.6,152.0  | Favored (23.2%)<br><i>m-10</i><br>chi angles: 301.4,321.6                | 0.02Å        | -            | -            | -            |
| A 260 | SER 25.25 | -                |                | Favored (20.57%)<br>General /<br>-81.2,115.3  | Favored (9.6%) <i>t</i><br>chi angles: 166                               | 0.06Å        | -            | -            | -            |
|       |           | Avg: Clashscore: | Outliers: 1 of | Poor rotamers: 0 of                           | Outliers:                                                                | Outliers:    | Outliers:    | Non-Trans: 1 |              |
|       |           | 29.18            | 5              | 340                                           | 287                                                                      | 0 of 322     | 0 of 347     | 0 of 347     | of 345       |
| A 261 | ARG 17.62 | -                |                | Favored (42.57%)<br>General /<br>-136.7,140.3 | Favored (43%)<br><i>ttt-90</i><br>chi angles:<br>196.5,187.3,191.2,279.5 | 0.04Å        | -            | -            | -            |
| A 262 | ASP 21.19 | -                |                | Favored (49.56%)<br>General /<br>-113.7,138.9 | Favored (30.1%)<br><i>t70</i><br>chi angles: 180.2,76.7                  | 0.03Å        | -            | -            | -            |
| A 263 | ASP 33    | -                |                | Favored (82.88%)<br>General /<br>-57.2,-43.7  | Favored (88%)<br><i>m-30</i><br>chi angles: 285.5,341.5                  | 0.01Å        | -            | -            | -            |
| A 264 | ARG 15.76 | -                |                | Favored (26.99%)<br>General /<br>-80.8,-39.2  | Favored (4.9%)<br><i>ttp80</i><br>chi angles:<br>187.1,176,103.5,76.7    | 0.01Å        | -            | -            | -            |
| A 265 | LEU 15.42 | -                |                | Favored (20.51%)<br>General /<br>-102.3,-9.3  | Favored (40.1%)<br><i>mt</i><br>chi angles: 296.2,186.1                  | 0.02Å        | -            | -            | -            |
| A 266 | GLY 14.59 | -                |                | Favored (33.14%)<br>Glycine /<br>79.0,-149.8  | -                                                                        | -            | -            | -            | -            |
| A 267 | PHE 15.76 | -                |                | Favored (40.55%)<br>General /<br>-70.1,129.9  | Favored (79.2%)<br><i>m-80</i><br>chi angles: 290.4,281.4                | 0.02Å        | -            | -            | -            |
| A 268 | LEU 16.67 | -                |                | Favored (34.37%)<br>General /<br>-86.6,130.8  | Favored (56.6%)<br><i>mt</i><br>chi angles: 297.4,184.5                  | 0.03Å        | -            | -            | -            |

|          |     |       |                                       |                                                    |                                                                          |       |   |   |   |
|----------|-----|-------|---------------------------------------|----------------------------------------------------|--------------------------------------------------------------------------|-------|---|---|---|
| A<br>269 | THR | 14.29 | -                                     | Favored<br>(28.06%)<br>General /<br>-127.0,161.6   | Favored (41.3%) <i>p</i><br>chi angles: 54.8                             | 0.04Å | - | - | - |
| A<br>270 | PHE | 23.12 | 0.54Å<br>CD2 with A<br>225 GLU<br>HG3 | Favored<br>(95.56%)<br>General /<br>-61.8,-45.0    | Favored (40.4%)<br><i>t80</i><br>chi angles: 164.4,76.4                  | 0.08Å | - | - | - |
| A<br>271 | CYS | 26.06 | -                                     | Favored<br>(24.23%)<br>Pre-Pro /<br>-97.8,132.8    | Favored (18.1%) <i>t</i><br>chi angles: 191.8                            | 0.05Å | - | - | - |
| A<br>272 | PRO | 16.46 | -                                     | Favored<br>(30.45%)<br>Trans-Pro /<br>-67.8,-10.9  | Favored (10.3%)<br><i>Cg_endo</i><br>chi angles:<br>15.4,335.5,23.2      | 0.04Å | - | - | - |
| A<br>273 | THR | 18.28 | -                                     | Favored<br>(62.03%)<br>General /<br>-70.2,-13.1    | Favored (66.5%) <i>p</i><br>chi angles: 62.9                             | 0.03Å | - | - | - |
| A<br>274 | ASN | 22.14 | -                                     | Favored<br>(19.16%)<br>General /<br>-111.6,18.4    | Favored (43.1%)<br><i>m110</i><br>chi angles: 298.3,125.2                | 0.01Å | - | - | - |
| A<br>275 | LEU | 17.87 | -                                     | Allowed<br>(1.79%)<br>General /<br>-73.2,-175.3    | Favored (29.6%)<br><i>mt</i><br>chi angles: 292.4,159.8                  | 0.02Å | - | - | - |
| A<br>276 | GLY | 16.54 | -                                     | Favored<br>(5.24%)<br>Glycine /<br>77.7,-119.3     | -                                                                        | -     | - | - | - |
| A<br>277 | THR | 12.84 | -                                     | Favored<br>(66.02%)<br>General /<br>-68.7,-27.6    | Favored (70.2%) <i>p</i><br>chi angles: 62.2                             | 0.06Å | - | - | - |
| A<br>278 | THR | 15.79 | -                                     | Allowed<br>(1.68%)<br>General / 63.4,4.3           | Allowed (1.9%) <i>p</i><br>chi angles: 81.9                              | 0.06Å | - | - | - |
| A<br>279 | ILE | 21.48 | -                                     | Favored<br>(38.08%)<br>Ile or Val /<br>-89.2,130.8 | Allowed (1.1%) <i>mt</i><br>chi angles: 275.4,182.8                      | 0.05Å | - | - | - |
| A<br>280 | ARG | 43.96 | -                                     | Favored<br>(12.16%)<br>General /<br>-121.7,107.3   | Favored (57.3%)<br><i>ttt-90</i><br>chi angles:<br>189.6,182.7,179.8,264 | 0.04Å | - | - | - |

# Alt Res High B Clash > 0.4Å Ramachandran Rotamer Cβ deviation Bond lengths Bond angles Cis Peptides

Avg: Clashscore: 29.18    Outliers: 1 of 340    Poor rotamers: 0 of 287    Outliers: 0 of 322    Outliers: 0 of 347    Outliers: 0 of 347    Non-Trans: 1 of 345

|          |           |                                       |                                                     |                                                                      |       |   |   |   |
|----------|-----------|---------------------------------------|-----------------------------------------------------|----------------------------------------------------------------------|-------|---|---|---|
| A<br>281 | ALA 23.3  | -                                     | Favored<br>(48.24%)<br>General /<br>-102.0,129.4    | -                                                                    | 0.03Å | - | - | - |
| A<br>282 | SER 21.91 | -                                     | Favored<br>(44.59%)<br>General /<br>-144.0,157.0    | Favored (70.6%) <i>p</i><br>chi angles: 59                           | 0.01Å | - | - | - |
| A<br>283 | VAL 23.44 | -                                     | Favored<br>(31.46%)<br>Ile or Val /<br>-126.7,148.3 | Favored (27.2%) <i>m</i><br>chi angles: 299.8                        | 0.01Å | - | - | - |
| A<br>284 | HIS 58.48 | -                                     | Favored<br>(26.79%)<br>General /<br>-95.9,115.0     | Favored (3.4%)<br><i>m170</i><br>chi angles: 270.6,202.8             | 0.01Å | - | - | - |
| A<br>285 | ILE 25.22 | -                                     | Favored<br>(23.34%)<br>Ile or Val /<br>-141.5,146.4 | Favored (17.5%) <i>tt</i><br>chi angles: 185.1,171.8                 | 0.05Å | - | - | - |
| A<br>286 | ALA 29.49 | -                                     | Favored<br>(40.24%)<br>General /<br>-109.3,119.7    | -                                                                    | 0.01Å | - | - | - |
| A<br>287 | LEU 36.08 | -                                     | Favored<br>(57.78%)<br>Pre-Pro /<br>-124.3,72.7     | Allowed (0.6%)<br><i>mm</i><br>chi angles: 288.1,319                 | 0.03Å | - | - | - |
| A<br>288 | PRO 40.26 | -                                     | Favored<br>(21.07%)<br>Trans-Pro /<br>-63.9,-42.0   | Favored (33.3%)<br><i>Cg_endo</i><br>chi angles:<br>21.9,326.4,31.2  | 0.04Å | - | - | - |
| A<br>289 | LYS 46.42 | 0.44Å<br>HD3 with A<br>356 ALA<br>HB3 | Favored<br>(85.29%)<br>General /<br>-61.6,-47.5     | Favored (9.2%)<br><i>mttp</i><br>chi angles:<br>279,157.3,154.8,66.9 | 0.02Å | - | - | - |
| A<br>290 | LEU 41.23 | -                                     | Favored<br>(65.43%)<br>General /<br>-67.6,-21.6     | Favored (39.8%)<br><i>mt</i><br>chi angles: 298,186.6                | 0.03Å | - | - | - |
| A<br>291 | ALA 55.95 | -                                     | Favored<br>(61.18%)<br>General /<br>-72.4,-23.9     | -                                                                    | 0.01Å | - | - | - |
| A<br>292 | ALA 66.57 | -                                     | Favored<br>(58.77%)<br>General / -88.1,-4.4         | -                                                                    | 0.02Å | - | - | - |
| A<br>293 | ALA 72.39 | 0.52Å<br>O with A 295<br>ALA N        | Favored<br>(4.11%)<br>General /<br>-104.0,-47.7     | -                                                                    | 0.02Å | - | - | - |



| #                                                                                                                                                                       | Alt Res   | High B                   | Clash > 0.4Å | Ramachandran                                 | Rotamer                                                             | Cβ deviation | Bond lengths | Bond angles | Cis Peptides |
|-------------------------------------------------------------------------------------------------------------------------------------------------------------------------|-----------|--------------------------|--------------|----------------------------------------------|---------------------------------------------------------------------|--------------|--------------|-------------|--------------|
| A 294                                                                                                                                                                   | ALA 66.69 | -                        | -            | OUTLIER (0.02%)<br>General / 56.9,-20.1      | -                                                                   | 0.04Å        | -            | -           | -            |
| A 295                                                                                                                                                                   | ALA 71.56 | N with A 293<br>ALA O    | 0.52Å        | Favored (13.02%)<br>General / -88.8,-40.6    | -                                                                   | 0.00Å        | -            | -           | -            |
| A 296                                                                                                                                                                   | ALA 67.89 | O with A 300<br>ILE HG12 | 0.44Å        | Favored (61.57%)<br>General / -73.5,-27.9    | -                                                                   | 0.03Å        | -            | -           | -            |
| A 297                                                                                                                                                                   | ALA 59.63 | -                        | -            | Allowed (0.93%)<br>General / -64.4,-64.2     | -                                                                   | 0.01Å        | -            | -           | -            |
| A 298                                                                                                                                                                   | GLU 68.38 | -                        | -            | Favored (63.58%)<br>General / -59.0,-25.4    | Allowed (1.3%)<br><i>mp0</i><br>chi angles: 262.1,72.3,183          | 0.01Å        | -            | -           | -            |
| A 299                                                                                                                                                                   | ALA 54.02 | -                        | -            | Favored (70.73%)<br>General / -58.2,-34.7    | -                                                                   | 0.01Å        | -            | -           | -            |
| A 300                                                                                                                                                                   | ILE 61.64 | HG12 with A 296<br>ALA O | 0.44Å        | Favored (18.82%)<br>Ile or Val / -83.2,-45.6 | Favored (6.1%)<br><i>mm</i><br>chi angles: 316.6,307.7              | 0.05Å        | -            | -           | -            |
| <p>Avg: Clashscore: 29.18    Outliers: 1 of 340    Poor rotamers: 0 of 287    Outliers: 0 of 322    Outliers: 0 of 347    Outliers: 0 of 347    Non-Trans: 1 of 345</p> |           |                          |              |                                              |                                                                     |              |              |             |              |
| A 301                                                                                                                                                                   | ALA 42.7  | -                        | -            | Favored (18.63%)<br>General / -52.2,-55.8    | -                                                                   | 0.02Å        | -            | -           | -            |
| A 302                                                                                                                                                                   | ALA 48.39 | -                        | -            | Favored (78.84%)<br>General / -62.1,-35.5    | -                                                                   | 0.01Å        | -            | -           | -            |
| A 303                                                                                                                                                                   | LYS 57.52 | HB2 with S 260<br>HOH O  | 0.41Å        | Favored (68.01%)<br>General / -72.4,-34.5    | Allowed (0.4%)<br><i>ttm</i><br>chi angles: 151.7,152.3,202.3,253.3 | 0.00Å        | -            | -           | -            |
| A 304                                                                                                                                                                   | PHE 39.93 | -                        | -            | Favored (38.67%)<br>General / -100.9,11.9    | Favored (58.5%)<br><i>m-80</i><br>chi angles: 284.9,278.7           | 0.04Å        | -            | -           | -            |
| A 305                                                                                                                                                                   | ASN 32.46 | -                        | -            | Favored (15.57%)<br>General / 61.7,38.0      | Favored (68.5%)<br><i>m-40</i><br>chi angles: 305.1,302.6           | 0.03Å        | -            | -           | -            |

|          |           |                                        |                                                     |                                                                           |       |   |   |   |
|----------|-----------|----------------------------------------|-----------------------------------------------------|---------------------------------------------------------------------------|-------|---|---|---|
| A<br>306 | LEU 32.9  | 0.58Å<br>HD11 with A<br>345 GLY<br>HA3 | Favored<br>(22.39%)<br>General /<br>-98.7,149.9     | Favored (72.7%)<br><i>mt</i><br>chi angles: 302.6,180.9                   | 0.01Å | - | - | - |
| A<br>307 | GLN 54.84 | -                                      | Favored<br>(55.5%)<br>General /<br>-109.5,130.5     | Allowed (0.6%) <i>tt0</i><br>chi angles:<br>146.8,159.8,23.1              | 0.03Å | - | - | - |
| A<br>308 | VAL 42.27 | -                                      | Favored<br>(34.5%)<br>Ile or Val /<br>-107.9,111.1  | Favored (85.6%) <i>t</i><br>chi angles: 173.6                             | 0.03Å | - | - | - |
| A<br>309 | ALA 46.93 | -                                      | -                                                   | -                                                                         | 0.02Å | - | - | - |
| A<br>320 | GLY 59.54 | -                                      | -                                                   | -                                                                         | -     | - | - | - |
| A<br>321 | GLY 61.05 | -                                      | Allowed<br>(0.42%)<br>Glycine /<br>-141.6,-14.6     | -                                                                         | -     | - | - | - |
| A<br>322 | VAL 53.99 | -                                      | Favored<br>(42.35%)<br>Ile or Val /<br>-102.1,114.7 | Allowed (0.5%) <i>p</i><br>chi angles: 48.1                               | 0.06Å | - | - | - |
| A<br>323 | TYR 56.8  | -                                      | Favored<br>(20.94%)<br>General /<br>-105.2,153.9    | Favored (77.9%)<br><i>m-80</i><br>chi angles: 300.1,287.4                 | 0.05Å | - | - | - |
| A<br>324 | ASP 46.72 | -                                      | Favored<br>(36.03%)<br>General /<br>-103.0,118.1    | Favored (14.9%)<br><i>t70</i><br>chi angles: 174.8,264.8                  | 0.02Å | - | - | - |
| A<br>325 | ILE 27.91 | -                                      | Favored<br>(75.09%)<br>Ile or Val /<br>-122.3,129.7 | Favored (27.4%)<br><i>mt</i><br>chi angles: 303.4,184.3                   | 0.04Å | - | - | - |
| A<br>326 | SER 26.67 | -                                      | Favored<br>(43.7%)<br>General /<br>-142.9,158.3     | Favored (57.1%) <i>p</i><br>chi angles: 57.5                              | 0.02Å | - | - | - |
| A<br>327 | ASN 26.1  | -                                      | Favored<br>(53.83%)<br>General /<br>-69.6,140.9     | Favored (15.3%)<br><i>p0</i><br>chi angles: 62.3,292.6                    | 0.02Å | - | - | - |
| A<br>328 | LYS 43.34 | -                                      | Favored<br>(22.16%)<br>General /<br>-85.3,-33.0     | Favored (4.1%)<br><i>mtpt</i><br>chi angles:<br>290.2,163.5,94.8,144.4    | 0.04Å | - | - | - |
| A<br>329 | ARG 25.65 | -                                      | Favored<br>(31.84%)<br>General /<br>-88.2,138.0     | Favored (44.3%)<br><i>mtp180</i><br>chi angles:<br>301.6,157.7,68.8,200.7 | 0.02Å | - | - | - |

| #        | Alt Res   | High B | Clash > 0.4Å              | Ramachandran                                    | Rotamer                                                                   | Cβ deviation          | Bond lengths          | Bond angles           | Cis Peptides           |
|----------|-----------|--------|---------------------------|-------------------------------------------------|---------------------------------------------------------------------------|-----------------------|-----------------------|-----------------------|------------------------|
| A<br>330 | ARG 29.18 | -      | -                         | Favored (4.41%)<br>General /<br>-119.6,-32.1    | Favored (3.6%)<br><i>mmt-90</i><br>chi angles:<br>316.9,259.3,187.1,283.4 | 0.04Å                 | -                     | -                     | -                      |
|          |           |        | Avg: Clashscore:<br>29.18 | Outliers: 1 of<br>340                           | Poor rotamers: 0 of<br>287                                                | Outliers: 0 of<br>322 | Outliers: 0 of<br>347 | Outliers: 0 of<br>347 | Non-Trans: 1<br>of 345 |
| A<br>331 | MET 18.5  | -      | -                         | Favored (23.65%)<br>General /<br>-110.5,154.4   | Favored (23.3%)<br><i>mtp</i><br>chi angles:<br>312,190.9,64.3            | 0.02Å                 | -                     | -                     | -                      |
| A<br>332 | GLY 18    | -      | -                         | Favored (88.43%)<br>Glycine / 84.3,-1.8         | -                                                                         | -                     | -                     | -                     | -                      |
| A<br>333 | LEU 19.44 | -      | -                         | Favored (44.46%)<br>General /<br>-141.3,158.0   | Allowed (0.8%) <i>pt</i><br>chi angles: 76.7,183.4                        | 0.02Å                 | -                     | -                     | -                      |
| A<br>334 | THR 16.91 | -      | -                         | Favored (14.75%)<br>General /<br>-78.5,171.7    | Favored (30.3%) <i>p</i><br>chi angles: 69.3                              | 0.02Å                 | -                     | -                     | -                      |
| A<br>335 | GLU 18.8  | -      | -                         | Favored (96.04%)<br>General /<br>-60.3,-43.9    | Favored (54.9%)<br><i>mp0</i><br>chi angles:<br>289.4,77.8,0.5            | 0.01Å                 | -                     | -                     | -                      |
| A<br>336 | TYR 25.85 | -      | -                         | Favored (76.47%)<br>General /<br>-58.2,-49.6    | Favored (92.4%)<br><i>t80</i><br>chi angles: 176.5,77.1                   | 0.02Å                 | -                     | -                     | -                      |
| A<br>337 | GLN 24.55 | -      | -                         | Favored (80.8%)<br>General /<br>-64.0,-35.5     | Favored (77.1%)<br><i>mt0</i><br>chi angles:<br>301.4,181.1,306           | 0.01Å                 | -                     | -                     | -                      |
| A<br>338 | ALA 19.92 | -      | -                         | Favored (79.71%)<br>General /<br>-62.6,-48.4    | -                                                                         | 0.02Å                 | -                     | -                     | -                      |
| A<br>339 | VAL 19.1  | -      | -                         | Favored (86.53%)<br>Ile or Val /<br>-67.7,-43.5 | Favored (50.4%) <i>t</i><br>chi angles: 169.5                             | 0.08Å                 | -                     | -                     | -                      |
| A<br>340 | LYS 31.26 | -      | -                         | Favored (71.75%)<br>General /<br>-61.8,-31.6    | Allowed (1.7%)<br><i>tptp</i><br>chi angles:<br>184.4,74.5,167.8,21.1     | 0.02Å                 | -                     | -                     | -                      |
| A<br>341 | GLU 29.96 | -      | -                         | Favored (71.52%)<br>General /<br>-68.7,-45.5    | Favored (21.9%)<br><i>tt0</i><br>chi angles:<br>194.6,171.1,54.9          | 0.04Å                 | -                     | -                     | -                      |

|          |                |               |                                        |                                                    |                                                                          |                     |                     |                    |                     |
|----------|----------------|---------------|----------------------------------------|----------------------------------------------------|--------------------------------------------------------------------------|---------------------|---------------------|--------------------|---------------------|
| A<br>342 | MET            | 33.72         | -                                      | Favored<br>(64.63%)<br>General /<br>-58.8,-52.7    | Favored (7.1%)<br><i>tmm</i><br>chi angles:<br>198.5,270.9,277.6         | 0.02Å               | -                   | -                  | -                   |
| A<br>343 | GLN            | 26.1          | -                                      | Favored<br>(30.55%)<br>General /<br>-49.8,-52.7    | Favored (21.9%)<br><i>tt0</i><br>chi angles:<br>163.6,178.2,298          | 0.01Å               | -                   | -                  | -                   |
| A<br>344 | ASP            | 30.84         | -                                      | Favored<br>(99.39%)<br>General /<br>-62.2,-42.6    | Favored (87.8%)<br><i>m-30</i><br>chi angles: 293.2,336                  | 0.03Å               | -                   | -                  | -                   |
| A<br>345 | GLY            | 20.91         | 0.58Å<br>HA3 with A<br>306 LEU<br>HD11 | Favored<br>(93.54%)<br>Glycine /<br>-61.6,-46.8    | -                                                                        | -                   | -                   | -                  | -                   |
| A<br>346 | ILE            | 21.13         | -                                      | Favored<br>(90.94%)<br>Ile or Val /<br>-64.3,-47.1 | Favored (3.5%)<br><i>mm</i><br>chi angles: 292.9,316.3                   | 0.08Å               | -                   | -                  | -                   |
| A<br>347 | LEU            | 20.49         | -                                      | Favored<br>(54.77%)<br>General /<br>-50.4,-44.4    | Favored (26.6%)<br><i>mt</i><br>chi angles: 287,180.8                    | 0.01Å               | -                   | -                  | -                   |
| A<br>348 | GLU            | 35.93         | -                                      | Favored<br>(79.49%)<br>General /<br>-67.4,-44.2    | Favored (2.8%)<br><i>tp30</i><br>chi angles:<br>210.3,49.6,45.1          | 0.03Å               | -                   | -                  | -                   |
| A<br>349 | MET            | 37.9          | -                                      | Favored<br>(98.51%)<br>General /<br>-63.5,-42.1    | Favored (68.5%)<br><i>mtt</i><br>chi angles:<br>294.2,178.6,186.5        | 0.02Å               | -                   | -                  | -                   |
| A<br>350 | ILE            | 22.8          | -                                      | Favored<br>(88.02%)<br>Ile or Val /<br>-63.0,-40.2 | Favored (25.9%)<br><i>mt</i><br>chi angles: 285.8,178.2                  | 0.06Å               | -                   | -                  | -                   |
| <b>#</b> | <b>Alt Res</b> | <b>High B</b> | <b>Clash &gt; 0.4Å</b>                 | <b>Ramachandran</b>                                | <b>Rotamer</b>                                                           | <b>Cβ deviation</b> | <b>Bond lengths</b> | <b>Bond angles</b> | <b>Cis Peptides</b> |
|          |                |               | Avg: Clashscore: 29.18                 | Outliers: 1 of 340                                 | Poor rotamers: 0 of 287                                                  | Outliers: 0 of 322  | Outliers: 0 of 347  | Outliers: 0 of 347 | Non-Trans: 1 of 345 |
| A<br>351 | LYS            | 29.63         | -                                      | Favored<br>(78.47%)<br>General /<br>-55.9,-46.1    | Favored (22.1%)<br><i>ttmt</i><br>chi angles:<br>187.6,185.2,307.9,183.8 | 0.04Å               | -                   | -                  | -                   |
| A<br>352 | MET            | 58.16         | -                                      | Favored<br>(92.82%)<br>General /<br>-65.5,-42.0    | Favored (22.5%)<br><i>mmt</i><br>chi angles:<br>295.7,307.1,166.4        | 0.00Å               | -                   | -                  | -                   |
| A<br>353 | GLU            | 35.05         | 0.46Å<br>HG2 with A<br>119 TYR         | Favored<br>(88.93%)<br>General /                   | Favored (43.5%)<br><i>tp30</i><br>chi angles:                            | 0.03Å               | -                   | -                  | -                   |

|     |     |       |             |             |                   |       |   |   |   |
|-----|-----|-------|-------------|-------------|-------------------|-------|---|---|---|
|     |     |       | CE1         | -59.1,-41.8 | 181.3,76.9,187.4  |       |   |   |   |
| A   |     |       |             | Favored     | Favored (2.6%)    |       |   |   |   |
| 354 | GLU | 47.38 | -           | (69.34%)    | <i>mm-30</i>      | 0.02Å | - | - | - |
|     |     |       |             | General /   | chi angles:       |       |   |   |   |
|     |     |       |             | -68.6,-30.6 | 285.8,267.1,316.9 |       |   |   |   |
| A   |     |       |             | Favored     |                   |       |   |   |   |
| 355 | ALA | 49.79 | -           | (23.74%)    | -                 | 0.00Å | - | - | - |
|     |     |       |             | General /   |                   |       |   |   |   |
|     |     |       |             | -90.0,-20.1 |                   |       |   |   |   |
| A   |     |       |             | Favored     |                   |       |   |   |   |
| 356 | ALA | 46.57 | 0.44Å       | (32.7%)     | -                 | 0.03Å | - | - | - |
|     |     |       | HB3 with A  | Pre-Pro /   |                   |       |   |   |   |
|     |     |       | 289 LYS HD3 | -57.0,151.7 |                   |       |   |   |   |
| A   |     |       |             |             | Favored (83.5%)   |       |   |   |   |
| 357 | PRO | 53.26 | -           | -           | <i>Cg_exo</i>     | 0.04Å | - | - | - |
|     |     |       |             |             | chi angles:       |       |   |   |   |
|     |     |       |             |             | 334.3,6.4,15.5    |       |   |   |   |
| B   | NA  | 41.35 | -           | -           | -                 | -     | - | - | - |
| S   | HOH | 8.5   | -           | -           | -                 | -     | - | - | - |
| S   | HOH | 8.22  | -           | -           | -                 | -     | - | - | - |
| S   | HOH | 12.77 | -           | -           | -                 | -     | - | - | - |
| S   | HOH | 11.56 | -           | -           | -                 | -     | - | - | - |
| S   | HOH | 22.16 | -           | -           | -                 | -     | - | - | - |
| S   | HOH | 17.16 | -           | -           | -                 | -     | - | - | - |
| S   | HOH | 13.22 | -           | -           | -                 | -     | - | - | - |
| S   | HOH | 14.72 | -           | -           | -                 | -     | - | - | - |
| S   | HOH | 13.6  | -           | -           | -                 | -     | - | - | - |
| S   | HOH | 11.71 | -           | -           | -                 | -     | - | - | - |
| S   | HOH | 12.98 | -           | -           | -                 | -     | - | - | - |
| S   | HOH | 24.37 | -           | -           | -                 | -     | - | - | - |

# Alt Res High B Clash > 0.4Å Ramachandran Rotamer Cβ deviation Bond lengths Bond angles Cis Peptides

Avg: Clashscore: 29.18    Outliers: 5    Outliers: 1 of 340    Poor rotamers: 0 of 287    Outliers: 0 of 322    Outliers: 0 of 347    Outliers: 0 of 347    Non-Trans: 1 of 345

|   |     |       |   |   |   |   |   |   |   |
|---|-----|-------|---|---|---|---|---|---|---|
| S | HOH | 19.48 | - | - | - | - | - | - | - |
| S | HOH | 21.09 | - | - | - | - | - | - | - |
| S | HOH | 18.89 | - | - | - | - | - | - | - |
| S | HOH | 21.11 | - | - | - | - | - | - | - |

|    |           |                                  |   |   |   |   |   |   |   |
|----|-----------|----------------------------------|---|---|---|---|---|---|---|
| S  |           |                                  |   |   |   |   |   |   |   |
| 17 | HOH 12.05 | -                                | - | - | - | - | - | - | - |
| S  |           |                                  |   |   |   |   |   |   |   |
| 18 | HOH 15.91 | -                                | - | - | - | - | - | - | - |
| S  |           |                                  |   |   |   |   |   |   |   |
| 19 | HOH 11.64 | -                                | - | - | - | - | - | - | - |
| S  |           |                                  |   |   |   |   |   |   |   |
| 20 | HOH 20.36 | -                                | - | - | - | - | - | - | - |
| S  |           |                                  |   |   |   |   |   |   |   |
| 21 | HOH 23.35 | 0.50Å<br>O with A 254<br>GLU OE2 | - | - | - | - | - | - | - |
| S  |           |                                  |   |   |   |   |   |   |   |
| 22 | HOH 23.13 | -                                | - | - | - | - | - | - | - |
| S  |           |                                  |   |   |   |   |   |   |   |
| 23 | HOH 16.32 | -                                | - | - | - | - | - | - | - |
| S  |           |                                  |   |   |   |   |   |   |   |
| 24 | HOH 18.21 | -                                | - | - | - | - | - | - | - |
| S  |           |                                  |   |   |   |   |   |   |   |
| 25 | HOH 20.62 | -                                | - | - | - | - | - | - | - |
| S  |           |                                  |   |   |   |   |   |   |   |
| 26 | HOH 12.85 | -                                | - | - | - | - | - | - | - |
| S  |           |                                  |   |   |   |   |   |   |   |
| 27 | HOH 19.37 | -                                | - | - | - | - | - | - | - |
| S  |           |                                  |   |   |   |   |   |   |   |
| 28 | HOH 18.74 | -                                | - | - | - | - | - | - | - |
| S  |           |                                  |   |   |   |   |   |   |   |
| 29 | HOH 13.82 | -                                | - | - | - | - | - | - | - |
| S  |           |                                  |   |   |   |   |   |   |   |
| 30 | HOH 13.29 | -                                | - | - | - | - | - | - | - |
| S  |           |                                  |   |   |   |   |   |   |   |
| 31 | HOH 23.6  | -                                | - | - | - | - | - | - | - |
| S  |           |                                  |   |   |   |   |   |   |   |
| 32 | HOH 18.23 | -                                | - | - | - | - | - | - | - |

| # | Alt Res | High B     | Clash > 0.4Å  | Ramachandran       | Rotamer                 | Cβ deviation       | Bond lengths       | Bond angles        | Cis Peptides        |
|---|---------|------------|---------------|--------------------|-------------------------|--------------------|--------------------|--------------------|---------------------|
|   |         | Avg: 29.18 | Clashscore: 5 | Outliers: 1 of 340 | Poor rotamers: 0 of 287 | Outliers: 0 of 322 | Outliers: 0 of 347 | Outliers: 0 of 347 | Non-Trans: 1 of 345 |

|    |           |   |   |   |   |   |   |   |   |
|----|-----------|---|---|---|---|---|---|---|---|
| S  |           |   |   |   |   |   |   |   |   |
| 33 | HOH 36.42 | - | - | - | - | - | - | - | - |
| S  |           |   |   |   |   |   |   |   |   |
| 34 | HOH 25.88 | - | - | - | - | - | - | - | - |
| S  |           |   |   |   |   |   |   |   |   |
| 35 | HOH 23.74 | - | - | - | - | - | - | - | - |
| S  |           |   |   |   |   |   |   |   |   |
| 36 | HOH 16.54 | - | - | - | - | - | - | - | - |

|    |     |       |   |   |   |   |   |   |   |
|----|-----|-------|---|---|---|---|---|---|---|
| S  |     |       |   |   |   |   |   |   |   |
| 37 | HOH | 17.71 | - | - | - | - | - | - | - |
| S  |     |       |   |   |   |   |   |   |   |
| 38 | HOH | 34.88 | - | - | - | - | - | - | - |
| S  |     |       |   |   |   |   |   |   |   |
| 39 | HOH | 22.08 | - | - | - | - | - | - | - |
| S  |     |       |   |   |   |   |   |   |   |
| 40 | HOH | 13.71 | - | - | - | - | - | - | - |
| S  |     |       |   |   |   |   |   |   |   |
| 41 | HOH | 19.25 | - | - | - | - | - | - | - |
| S  |     |       |   |   |   |   |   |   |   |
| 42 | HOH | 26.67 | - | - | - | - | - | - | - |
| S  |     |       |   |   |   |   |   |   |   |
| 43 | HOH | 25.1  | - | - | - | - | - | - | - |
| S  |     |       |   |   |   |   |   |   |   |
| 44 | HOH | 22.71 | - | - | - | - | - | - | - |
| S  |     |       |   |   |   |   |   |   |   |
| 45 | HOH | 20.81 | - | - | - | - | - | - | - |
| S  |     |       |   |   |   |   |   |   |   |
| 46 | HOH | 26.3  | - | - | - | - | - | - | - |
| S  |     |       |   |   |   |   |   |   |   |
| 47 | HOH | 31.7  | - | - | - | - | - | - | - |
| S  |     |       |   |   |   |   |   |   |   |
| 48 | HOH | 29.57 | - | - | - | - | - | - | - |
| S  |     |       |   |   |   |   |   |   |   |
| 49 | HOH | 21.21 | - | - | - | - | - | - | - |
| S  |     |       |   |   |   |   |   |   |   |
| 50 | HOH | 17.53 | - | - | - | - | - | - | - |
| S  |     |       |   |   |   |   |   |   |   |
| 51 | HOH | 29.17 | - | - | - | - | - | - | - |
| S  |     |       |   |   |   |   |   |   |   |
| 52 | HOH | 21.55 | - | - | - | - | - | - | - |

**#** **Alt Res** **High B** **Clash > 0.4Å** **Ramachandran** **Rotamer** **Cβ deviation** **Bond lengths** **Bond angles** **Cis Peptides**

Avg: Clashscore: 29.18    Outliers: 5 of 340    Poor rotamers: 0 of 287    Outliers: 0 of 322    Outliers: 0 of 347    Outliers: 0 of 347    Non-Trans: 1 of 345

|    |     |       |   |   |   |   |   |   |   |
|----|-----|-------|---|---|---|---|---|---|---|
| S  |     |       |   |   |   |   |   |   |   |
| 53 | HOH | 30.63 | - | - | - | - | - | - | - |
| S  |     |       |   |   |   |   |   |   |   |
| 54 | HOH | 25.19 | - | - | - | - | - | - | - |
| S  |     |       |   |   |   |   |   |   |   |
| 55 | HOH | 27.07 | - | - | - | - | - | - | - |
| S  |     |       |   |   |   |   |   |   |   |
| 56 | HOH | 32.53 | - | - | - | - | - | - | - |

|    |     |       |   |   |   |   |   |   |   |
|----|-----|-------|---|---|---|---|---|---|---|
| S  |     |       |   |   |   |   |   |   |   |
| 57 | HOH | 24.2  | - | - | - | - | - | - | - |
| S  |     |       |   |   |   |   |   |   |   |
| 58 | HOH | 39.84 | - | - | - | - | - | - | - |
| S  |     |       |   |   |   |   |   |   |   |
| 59 | HOH | 18.87 | - | - | - | - | - | - | - |
| S  |     |       |   |   |   |   |   |   |   |
| 60 | HOH | 31.08 | - | - | - | - | - | - | - |
| S  |     |       |   |   |   |   |   |   |   |
| 61 | HOH | 24.09 | - | - | - | - | - | - | - |
| S  |     |       |   |   |   |   |   |   |   |
| 62 | HOH | 20.53 | - | - | - | - | - | - | - |
| S  |     |       |   |   |   |   |   |   |   |
| 63 | HOH | 22.4  | - | - | - | - | - | - | - |
| S  |     |       |   |   |   |   |   |   |   |
| 64 | HOH | 20.86 | - | - | - | - | - | - | - |
| S  |     |       |   |   |   |   |   |   |   |
| 65 | HOH | 30.99 | - | - | - | - | - | - | - |
| S  |     |       |   |   |   |   |   |   |   |
| 66 | HOH | 16.89 | - | - | - | - | - | - | - |
| S  |     |       |   |   |   |   |   |   |   |
| 67 | HOH | 32.59 | - | - | - | - | - | - | - |
| S  |     |       |   |   |   |   |   |   |   |
| 68 | HOH | 19.48 | - | - | - | - | - | - | - |
| S  |     |       |   |   |   |   |   |   |   |
| 69 | HOH | 34.3  | - | - | - | - | - | - | - |
| S  |     |       |   |   |   |   |   |   |   |
| 70 | HOH | 21.36 | - | - | - | - | - | - | - |
| S  |     |       |   |   |   |   |   |   |   |
| 71 | HOH | 22.38 | - | - | - | - | - | - | - |
| S  |     |       |   |   |   |   |   |   |   |
| 72 | HOH | 26.88 | - | - | - | - | - | - | - |

# Alt Res High B Clash > 0.4Å Ramachandran Rotamer Cβ deviation Bond lengths Bond angles Cis Peptides

Avg: Clashscore: 29.18    Outliers: 5    Outliers: 1 of 340    Poor rotamers: 0 of 287    Outliers: 0 of 322    Outliers: 0 of 347    Outliers: 0 of 347    Non-Trans: 1 of 345

|    |     |       |   |   |   |   |   |   |   |
|----|-----|-------|---|---|---|---|---|---|---|
| S  |     |       |   |   |   |   |   |   |   |
| 73 | HOH | 19.81 | - | - | - | - | - | - | - |
| S  |     |       |   |   |   |   |   |   |   |
| 74 | HOH | 26.75 | - | - | - | - | - | - | - |
| S  |     |       |   |   |   |   |   |   |   |
| 75 | HOH | 30.57 | - | - | - | - | - | - | - |
| S  |     |       |   |   |   |   |   |   |   |
| 76 | HOH | 20.86 | - | - | - | - | - | - | - |



|    |     |       |   |   |   |   |   |   |   |
|----|-----|-------|---|---|---|---|---|---|---|
| S  |     |       |   |   |   |   |   |   |   |
| 77 | HOH | 24.54 | - | - | - | - | - | - | - |
| S  |     |       |   |   |   |   |   |   |   |
| 78 | HOH | 24.53 | - | - | - | - | - | - | - |
| S  |     |       |   |   |   |   |   |   |   |
| 79 | HOH | 24.72 | - | - | - | - | - | - | - |
| S  |     |       |   |   |   |   |   |   |   |
| 80 | HOH | 24.4  | - | - | - | - | - | - | - |
| S  |     |       |   |   |   |   |   |   |   |
| 81 | HOH | 37.9  | - | - | - | - | - | - | - |
| S  |     |       |   |   |   |   |   |   |   |
| 82 | HOH | 20.98 | - | - | - | - | - | - | - |
| S  |     |       |   |   |   |   |   |   |   |
| 83 | HOH | 25.13 | - | - | - | - | - | - | - |
| S  |     |       |   |   |   |   |   |   |   |
| 84 | HOH | 25.11 | - | - | - | - | - | - | - |
| S  |     |       |   |   |   |   |   |   |   |
| 85 | HOH | 27.93 | - | - | - | - | - | - | - |
| S  |     |       |   |   |   |   |   |   |   |
| 86 | HOH | 27.15 | - | - | - | - | - | - | - |
| S  |     |       |   |   |   |   |   |   |   |
| 87 | HOH | 27.74 | - | - | - | - | - | - | - |
| S  |     |       |   |   |   |   |   |   |   |
| 88 | HOH | 23.92 | - | - | - | - | - | - | - |
| S  |     |       |   |   |   |   |   |   |   |
| 89 | HOH | 42.57 | - | - | - | - | - | - | - |
| S  |     |       |   |   |   |   |   |   |   |
| 90 | HOH | 29    | - | - | - | - | - | - | - |
| S  |     |       |   |   |   |   |   |   |   |
| 91 | HOH | 32.31 | - | - | - | - | - | - | - |
| S  |     |       |   |   |   |   |   |   |   |
| 92 | HOH | 34.2  | - | - | - | - | - | - | - |

# Alt Res High B Clash > 0.4Å Ramachandran Rotamer Cβ deviation Bond lengths Bond angles Cis Peptides

Avg: Clashscore: 29.18    Outliers: 5 of 340    Poor rotamers: 0 of 287    Outliers: 0 of 322    Outliers: 0 of 347    Outliers: 0 of 347    Non-Trans: 1 of 345

|    |     |       |   |   |   |   |   |   |   |
|----|-----|-------|---|---|---|---|---|---|---|
| S  |     |       |   |   |   |   |   |   |   |
| 93 | HOH | 25.65 | - | - | - | - | - | - | - |
| S  |     |       |   |   |   |   |   |   |   |
| 94 | HOH | 29.25 | - | - | - | - | - | - | - |
| S  |     |       |   |   |   |   |   |   |   |
| 95 | HOH | 22.56 | - | - | - | - | - | - | - |
| S  |     |       |   |   |   |   |   |   |   |
| 96 | HOH | 15.03 | - | - | - | - | - | - | - |

|     |     |       |   |   |   |   |   |   |   |
|-----|-----|-------|---|---|---|---|---|---|---|
| S   |     |       |   |   |   |   |   |   |   |
| 97  | HOH | 33.22 | - | - | - | - | - | - | - |
| S   |     |       |   |   |   |   |   |   |   |
| 98  | HOH | 22.93 | - | - | - | - | - | - | - |
| S   |     |       |   |   |   |   |   |   |   |
| 99  | HOH | 26.86 | - | - | - | - | - | - | - |
| S   |     |       |   |   |   |   |   |   |   |
| 100 | HOH | 34.58 | - | - | - | - | - | - | - |
| S   |     |       |   |   |   |   |   |   |   |
| 101 | HOH | 33.61 | - | - | - | - | - | - | - |
| S   |     |       |   |   |   |   |   |   |   |
| 102 | HOH | 37.87 | - | - | - | - | - | - | - |
| S   |     |       |   |   |   |   |   |   |   |
| 103 | HOH | 43.37 | - | - | - | - | - | - | - |
| S   |     |       |   |   |   |   |   |   |   |
| 104 | HOH | 41.07 | - | - | - | - | - | - | - |
| S   |     |       |   |   |   |   |   |   |   |
| 105 | HOH | 37.87 | - | - | - | - | - | - | - |
| S   |     |       |   |   |   |   |   |   |   |
| 106 | HOH | 33.8  | - | - | - | - | - | - | - |
| S   |     |       |   |   |   |   |   |   |   |
| 107 | HOH | 24.55 | - | - | - | - | - | - | - |
| S   |     |       |   |   |   |   |   |   |   |
| 108 | HOH | 26.6  | - | - | - | - | - | - | - |
| S   |     |       |   |   |   |   |   |   |   |
| 109 | HOH | 23.44 | - | - | - | - | - | - | - |
| S   |     |       |   |   |   |   |   |   |   |
| 110 | HOH | 25.46 | - | - | - | - | - | - | - |
| S   |     |       |   |   |   |   |   |   |   |
| 111 | HOH | 24.3  | - | - | - | - | - | - | - |
| S   |     |       |   |   |   |   |   |   |   |
| 112 | HOH | 26.51 | - | - | - | - | - | - | - |

# Alt Res High B Clash > 0.4Å Ramachandran Rotamer Cβ deviation Bond lengths Bond angles Cis Peptides

Avg: Clashscore: 29.18    Outliers: 5    Outliers: 1 of 340    Poor rotamers: 0 of 287    Outliers: 0 of 322    Outliers: 0 of 347    Outliers: 0 of 347    Non-Trans: 1 of 345

|     |     |       |   |   |   |   |   |   |   |
|-----|-----|-------|---|---|---|---|---|---|---|
| S   |     |       |   |   |   |   |   |   |   |
| 113 | HOH | 24.51 | - | - | - | - | - | - | - |
| S   |     |       |   |   |   |   |   |   |   |
| 114 | HOH | 40.77 | - | - | - | - | - | - | - |
| S   |     |       |   |   |   |   |   |   |   |
| 115 | HOH | 28.66 | - | - | - | - | - | - | - |
| S   |     |       |   |   |   |   |   |   |   |
| 116 | HOH | 20.3  | - | - | - | - | - | - | - |

|     |           |   |   |   |   |   |   |   |   |
|-----|-----------|---|---|---|---|---|---|---|---|
| S   | HOH 29.92 | - | - | - | - | - | - | - | - |
| 117 |           |   |   |   |   |   |   |   |   |
| S   | HOH 22.84 | - | - | - | - | - | - | - | - |
| 118 |           |   |   |   |   |   |   |   |   |
| S   | HOH 36.15 | - | - | - | - | - | - | - | - |
| 119 |           |   |   |   |   |   |   |   |   |
| S   | HOH 39.73 | - | - | - | - | - | - | - | - |
| 120 |           |   |   |   |   |   |   |   |   |
| S   | HOH 43.31 | - | - | - | - | - | - | - | - |
| 121 |           |   |   |   |   |   |   |   |   |
| S   | HOH 34.83 | - | - | - | - | - | - | - | - |
| 122 |           |   |   |   |   |   |   |   |   |
| S   | HOH 28.56 | - | - | - | - | - | - | - | - |
| 123 |           |   |   |   |   |   |   |   |   |
| S   | HOH 32.17 | - | - | - | - | - | - | - | - |
| 124 |           |   |   |   |   |   |   |   |   |
| S   | HOH 30.3  | - | - | - | - | - | - | - | - |
| 125 |           |   |   |   |   |   |   |   |   |
| S   | HOH 35.47 | - | - | - | - | - | - | - | - |
| 126 |           |   |   |   |   |   |   |   |   |
| S   | HOH 34.3  | - | - | - | - | - | - | - | - |
| 127 |           |   |   |   |   |   |   |   |   |
| S   | HOH 29.61 | - | - | - | - | - | - | - | - |
| 128 |           |   |   |   |   |   |   |   |   |
| S   | HOH 28.27 | - | - | - | - | - | - | - | - |
| 129 |           |   |   |   |   |   |   |   |   |
| S   | HOH 31.79 | - | - | - | - | - | - | - | - |
| 130 |           |   |   |   |   |   |   |   |   |
| S   | HOH 33.54 | - | - | - | - | - | - | - | - |
| 131 |           |   |   |   |   |   |   |   |   |
| S   | HOH 32.27 | - | - | - | - | - | - | - | - |
| 132 |           |   |   |   |   |   |   |   |   |

# Alt Res High B Clash > 0.4Å Ramachandran Rotamer Cβ deviation Bond lengths Bond angles Cis Peptides

Avg: Clashscore: 29.18    Outliers: 1 of 340    Poor rotamers: 0 of 287    Outliers: 0 of 322    Outliers: 0 of 347    Outliers: 0 of 347    Non-Trans: 1 of 345

|     |           |                                 |   |   |   |   |   |   |   |
|-----|-----------|---------------------------------|---|---|---|---|---|---|---|
| S   | HOH 41.57 | -                               | - | - | - | - | - | - | - |
| 133 |           |                                 |   |   |   |   |   |   |   |
| S   | HOH 43.23 | -                               | - | - | - | - | - | - | - |
| 134 |           | 0.49Å<br>O with A 94<br>LYS HE2 |   |   |   |   |   |   |   |
| S   | HOH 36.92 | -                               | - | - | - | - | - | - | - |
| 135 |           |                                 |   |   |   |   |   |   |   |
| S   | HOH 26.95 | -                               | - | - | - | - | - | - | - |
| 136 |           |                                 |   |   |   |   |   |   |   |

|     |     |       |   |   |   |   |   |   |   |
|-----|-----|-------|---|---|---|---|---|---|---|
| S   |     |       |   |   |   |   |   |   |   |
| 137 | HOH | 23.64 | - | - | - | - | - | - | - |
| S   |     |       |   |   |   |   |   |   |   |
| 138 | HOH | 35.37 | - | - | - | - | - | - | - |
| S   |     |       |   |   |   |   |   |   |   |
| 139 | HOH | 36.14 | - | - | - | - | - | - | - |
| S   |     |       |   |   |   |   |   |   |   |
| 140 | HOH | 17.91 | - | - | - | - | - | - | - |
| S   |     |       |   |   |   |   |   |   |   |
| 141 | HOH | 25.1  | - | - | - | - | - | - | - |
| S   |     |       |   |   |   |   |   |   |   |
| 142 | HOH | 38.76 | - | - | - | - | - | - | - |
| S   |     |       |   |   |   |   |   |   |   |
| 143 | HOH | 40.88 | - | - | - | - | - | - | - |
| S   |     |       |   |   |   |   |   |   |   |
| 144 | HOH | 27.3  | - | - | - | - | - | - | - |
| S   |     |       |   |   |   |   |   |   |   |
| 145 | HOH | 32.24 | - | - | - | - | - | - | - |
| S   |     |       |   |   |   |   |   |   |   |
| 146 | HOH | 16.08 | - | - | - | - | - | - | - |
| S   |     |       |   |   |   |   |   |   |   |
| 147 | HOH | 13.29 | - | - | - | - | - | - | - |
| S   |     |       |   |   |   |   |   |   |   |
| 148 | HOH | 19.06 | - | - | - | - | - | - | - |
| S   |     |       |   |   |   |   |   |   |   |
| 149 | HOH | 20.1  | - | - | - | - | - | - | - |
| S   |     |       |   |   |   |   |   |   |   |
| 150 | HOH | 19.33 | - | - | - | - | - | - | - |
| S   |     |       |   |   |   |   |   |   |   |
| 151 | HOH | 28.93 | - | - | - | - | - | - | - |
| S   |     |       |   |   |   |   |   |   |   |
| 152 | HOH | 34.79 | - | - | - | - | - | - | - |

# Alt Res High B Clash > 0.4Å Ramachandran Rotamer Cβ deviation Bond lengths Bond angles Cis Peptides

Avg: Clashscore: 29.18    Outliers: 5 of 340    Poor rotamers: 0 of 287    Outliers: 0 of 322    Outliers: 0 of 347    Outliers: 0 of 347    Non-Trans: 1 of 345

|     |     |       |   |   |   |   |   |   |   |
|-----|-----|-------|---|---|---|---|---|---|---|
| S   |     |       |   |   |   |   |   |   |   |
| 153 | HOH | 28.27 | - | - | - | - | - | - | - |
| S   |     |       |   |   |   |   |   |   |   |
| 154 | HOH | 31.88 | - | - | - | - | - | - | - |
| S   |     |       |   |   |   |   |   |   |   |
| 155 | HOH | 26.11 | - | - | - | - | - | - | - |
| S   |     |       |   |   |   |   |   |   |   |
| 156 | HOH | 28.02 | - | - | - | - | - | - | - |

|     |                         |       |   |   |   |   |   |   |   |
|-----|-------------------------|-------|---|---|---|---|---|---|---|
| S   | HOH 23.81               | -     | - | - | - | - | - | - | - |
| 157 |                         |       |   |   |   |   |   |   |   |
| S   | HOH 35.21               | -     | - | - | - | - | - | - | - |
| 158 |                         |       |   |   |   |   |   |   |   |
| S   | HOH 29.9                | -     | - | - | - | - | - | - | - |
| 159 |                         |       |   |   |   |   |   |   |   |
| S   | HOH 21.78               | -     | - | - | - | - | - | - | - |
| 160 |                         |       |   |   |   |   |   |   |   |
| S   | HOH 34.62               | -     | - | - | - | - | - | - | - |
| 161 |                         |       |   |   |   |   |   |   |   |
| S   | HOH 31.43               | -     | - | - | - | - | - | - | - |
| 162 |                         |       |   |   |   |   |   |   |   |
| S   | HOH 35.69               | -     | - | - | - | - | - | - | - |
| 163 |                         |       |   |   |   |   |   |   |   |
| S   | HOH 29.56               | -     | - | - | - | - | - | - | - |
| 164 |                         |       |   |   |   |   |   |   |   |
| S   | HOH 34.05               | -     | - | - | - | - | - | - | - |
| 165 |                         |       |   |   |   |   |   |   |   |
| S   | HOH 23.28               | -     | - | - | - | - | - | - | - |
| 166 | O with A 124<br>HIS ND1 | 0.56Å |   |   |   |   |   |   |   |
| S   | HOH 39.56               | -     | - | - | - | - | - | - | - |
| 167 |                         |       |   |   |   |   |   |   |   |
| S   | HOH 30.32               | -     | - | - | - | - | - | - | - |
| 168 |                         |       |   |   |   |   |   |   |   |
| S   | HOH 29.31               | -     | - | - | - | - | - | - | - |
| 169 |                         |       |   |   |   |   |   |   |   |
| S   | HOH 35.63               | -     | - | - | - | - | - | - | - |
| 170 |                         |       |   |   |   |   |   |   |   |
| S   | HOH 21.31               | -     | - | - | - | - | - | - | - |
| 171 |                         |       |   |   |   |   |   |   |   |
| S   | HOH 34.39               | -     | - | - | - | - | - | - | - |
| 172 |                         |       |   |   |   |   |   |   |   |

**#** **Alt Res** **High B** **Clash > 0.4Å** **Ramachandran** **Rotamer** **Cβ deviation** **Bond lengths** **Bond angles** **Cis Peptides**

Avg: Clashscore: 29.18    Outliers: 5    Outliers: 1 of 340    Poor rotamers: 0 of 287    Outliers: 0 of 322    Outliers: 0 of 347    Outliers: 0 of 347    Non-Trans: 1 of 345

|     |           |   |   |   |   |   |   |   |   |
|-----|-----------|---|---|---|---|---|---|---|---|
| S   | HOH 40.07 | - | - | - | - | - | - | - | - |
| 173 |           |   |   |   |   |   |   |   |   |
| S   | HOH 30.24 | - | - | - | - | - | - | - | - |
| 174 |           |   |   |   |   |   |   |   |   |
| S   | HOH 32.7  | - | - | - | - | - | - | - | - |
| 175 |           |   |   |   |   |   |   |   |   |
| S   | HOH 35.4  | - | - | - | - | - | - | - | - |
| 176 |           |   |   |   |   |   |   |   |   |

|     |     |       |                                  |   |   |   |   |   |   |   |
|-----|-----|-------|----------------------------------|---|---|---|---|---|---|---|
| S   |     |       |                                  |   |   |   |   |   |   |   |
| 177 | HOH | 34.96 | -                                | - | - | - | - | - | - | - |
| S   |     |       |                                  |   |   |   |   |   |   |   |
| 178 | HOH | 40.25 | -                                | - | - | - | - | - | - | - |
| S   |     |       |                                  |   |   |   |   |   |   |   |
| 179 | HOH | 32.44 | -                                | - | - | - | - | - | - | - |
| S   |     |       |                                  |   |   |   |   |   |   |   |
| 180 | HOH | 31.92 | -                                | - | - | - | - | - | - | - |
| S   |     |       |                                  |   |   |   |   |   |   |   |
| 181 | HOH | 38.23 | -                                | - | - | - | - | - | - | - |
| S   |     |       |                                  |   |   |   |   |   |   |   |
| 182 | HOH | 32.41 | -                                | - | - | - | - | - | - | - |
| S   |     |       |                                  |   |   |   |   |   |   |   |
| 183 | HOH | 29.56 | -                                | - | - | - | - | - | - | - |
| S   |     |       |                                  |   |   |   |   |   |   |   |
| 184 | HOH | 32.4  | -                                | - | - | - | - | - | - | - |
| S   |     |       |                                  |   |   |   |   |   |   |   |
| 185 | HOH | 44.17 | -                                | - | - | - | - | - | - | - |
| S   |     |       |                                  |   |   |   |   |   |   |   |
| 186 | HOH | 39.6  | -                                | - | - | - | - | - | - | - |
| S   |     |       |                                  |   |   |   |   |   |   |   |
| 187 | HOH | 35.14 | -                                | - | - | - | - | - | - | - |
| S   |     |       |                                  |   |   |   |   |   |   |   |
| 188 | HOH | 48.83 | -                                | - | - | - | - | - | - | - |
| S   |     |       |                                  |   |   |   |   |   |   |   |
| 189 | HOH | 37.33 | -                                | - | - | - | - | - | - | - |
| S   |     |       |                                  |   |   |   |   |   |   |   |
| 190 | HOH | 28.2  | -                                | - | - | - | - | - | - | - |
| S   |     |       |                                  |   |   |   |   |   |   |   |
| 191 | HOH | 30.39 | 0.78Å<br>O with A 183<br>ASP OD2 | - | - | - | - | - | - | - |
| S   |     |       |                                  |   |   |   |   |   |   |   |
| 192 | HOH | 36.28 | -                                | - | - | - | - | - | - | - |

| # | Alt | Res | High<br>B        | Clash ><br>0.4Å | Ramachandran        | Rotamer   | Cβ<br>deviation | Bond<br>lengths | Bond<br>angles      | Cis<br>Peptides |
|---|-----|-----|------------------|-----------------|---------------------|-----------|-----------------|-----------------|---------------------|-----------------|
|   |     |     | Avg: Clashscore: | Outliers: 1 of  | Poor rotamers: 0 of | Outliers: | Outliers:       | Outliers:       | Non-Trans: 1 of 345 |                 |
|   |     |     | 29.18            | 5               | 340                 | 287       | 0 of 322        | 0 of 347        | 0 of 347            |                 |

|     |     |       |   |   |   |   |   |   |   |   |
|-----|-----|-------|---|---|---|---|---|---|---|---|
| S   |     |       |   |   |   |   |   |   |   |   |
| 193 | HOH | 29.36 | - | - | - | - | - | - | - | - |
| S   |     |       |   |   |   |   |   |   |   |   |
| 194 | HOH | 43.25 | - | - | - | - | - | - | - | - |
| S   |     |       |   |   |   |   |   |   |   |   |
| 195 | HOH | 36.14 | - | - | - | - | - | - | - | - |
| S   |     |       |   |   |   |   |   |   |   |   |
| 196 | HOH | 26.42 | - | - | - | - | - | - | - | - |

|     |     |       |   |   |   |   |   |   |   |   |
|-----|-----|-------|---|---|---|---|---|---|---|---|
| S   |     |       |   |   |   |   |   |   |   |   |
| 197 | HOH | 35.9  | - | - | - | - | - | - | - | - |
| S   |     |       |   |   |   |   |   |   |   |   |
| 198 | HOH | 27.85 | - | - | - | - | - | - | - | - |
| S   |     |       |   |   |   |   |   |   |   |   |
| 199 | HOH | 27.44 | - | - | - | - | - | - | - | - |
| S   |     |       |   |   |   |   |   |   |   |   |
| 200 | HOH | 35.37 | - | - | - | - | - | - | - | - |
| S   |     |       |   |   |   |   |   |   |   |   |
| 201 | HOH | 26.18 | - | - | - | - | - | - | - | - |
| S   |     |       |   |   |   |   |   |   |   |   |
| 202 | HOH | 26.31 | - | - | - | - | - | - | - | - |
| S   |     |       |   |   |   |   |   |   |   |   |
| 203 | HOH | 44.17 | - | - | - | - | - | - | - | - |
| S   |     |       |   |   |   |   |   |   |   |   |
| 204 | HOH | 47.73 | - | - | - | - | - | - | - | - |
| S   |     |       |   |   |   |   |   |   |   |   |
| 205 | HOH | 44.75 | - | - | - | - | - | - | - | - |
| S   |     |       |   |   |   |   |   |   |   |   |
| 206 | HOH | 48.32 | - | - | - | - | - | - | - | - |
| S   |     |       |   |   |   |   |   |   |   |   |
| 207 | HOH | 24.08 | - | - | - | - | - | - | - | - |
| S   |     |       |   |   |   |   |   |   |   |   |
| 208 | HOH | 40.9  | - | - | - | - | - | - | - | - |
| S   |     |       |   |   |   |   |   |   |   |   |
| 209 | HOH | 17.74 | - | - | - | - | - | - | - | - |
| S   |     |       |   |   |   |   |   |   |   |   |
| 210 | HOH | 30.58 | - | - | - | - | - | - | - | - |
| S   |     |       |   |   |   |   |   |   |   |   |
| 211 | HOH | 35.73 | - | - | - | - | - | - | - | - |
| S   |     |       |   |   |   |   |   |   |   |   |
| 212 | HOH | 31.4  | - | - | - | - | - | - | - | - |

# Alt Res High B Clash > 0.4Å Ramachandran Rotamer Cβ deviation Bond lengths Bond angles Cis Peptides

Avg: Clashscore: 29.18    Outliers: 5 of 340    Poor rotamers: 0 of 287    Outliers: 0 of 322    Outliers: 0 of 347    Outliers: 0 of 347    Non-Trans: 1 of 345

|     |     |       |   |   |   |   |   |   |   |   |
|-----|-----|-------|---|---|---|---|---|---|---|---|
| S   |     |       |   |   |   |   |   |   |   |   |
| 213 | HOH | 25.82 | - | - | - | - | - | - | - | - |
| S   |     |       |   |   |   |   |   |   |   |   |
| 214 | HOH | 38.71 | - | - | - | - | - | - | - | - |
| S   |     |       |   |   |   |   |   |   |   |   |
| 215 | HOH | 42.61 | - | - | - | - | - | - | - | - |
| S   |     |       |   |   |   |   |   |   |   |   |
| 216 | HOH | 48.63 | - | - | - | - | - | - | - | - |

|     |           |                                  |   |   |   |   |   |   |   |
|-----|-----------|----------------------------------|---|---|---|---|---|---|---|
| S   | HOH 42.02 | -                                | - | - | - | - | - | - | - |
| 217 |           |                                  |   |   |   |   |   |   |   |
| S   | HOH 33.13 | -                                | - | - | - | - | - | - | - |
| 218 |           |                                  |   |   |   |   |   |   |   |
| S   | HOH 20.71 | -                                | - | - | - | - | - | - | - |
| 219 |           |                                  |   |   |   |   |   |   |   |
| S   | HOH 26.11 | -                                | - | - | - | - | - | - | - |
| 220 |           |                                  |   |   |   |   |   |   |   |
| S   | HOH 32.32 | -                                | - | - | - | - | - | - | - |
| 221 |           |                                  |   |   |   |   |   |   |   |
| S   | HOH 34.5  | 0.65Å<br>O with A 160<br>GLU O   | - | - | - | - | - | - | - |
| 222 |           |                                  |   |   |   |   |   |   |   |
| S   | HOH 39.5  | -                                | - | - | - | - | - | - | - |
| 223 |           |                                  |   |   |   |   |   |   |   |
| S   | HOH 44.67 | -                                | - | - | - | - | - | - | - |
| 224 |           |                                  |   |   |   |   |   |   |   |
| S   | HOH 38.45 | -                                | - | - | - | - | - | - | - |
| 225 |           |                                  |   |   |   |   |   |   |   |
| S   | HOH 40.91 | -                                | - | - | - | - | - | - | - |
| 226 |           |                                  |   |   |   |   |   |   |   |
| S   | HOH 40.59 | -                                | - | - | - | - | - | - | - |
| 227 |           |                                  |   |   |   |   |   |   |   |
| S   | HOH 45.19 | -                                | - | - | - | - | - | - | - |
| 228 |           |                                  |   |   |   |   |   |   |   |
| S   | HOH 32.02 | -                                | - | - | - | - | - | - | - |
| 229 |           |                                  |   |   |   |   |   |   |   |
| S   | HOH 23.79 | -                                | - | - | - | - | - | - | - |
| 230 |           |                                  |   |   |   |   |   |   |   |
| S   | HOH 35.68 | 0.76Å<br>O with A 229<br>ARG NH1 | - | - | - | - | - | - | - |
| 231 |           |                                  |   |   |   |   |   |   |   |
| S   | HOH 36.51 | -                                | - | - | - | - | - | - | - |
| 232 |           |                                  |   |   |   |   |   |   |   |

| # | <u>Alt Res</u> | <u>High B</u> | <u>Clash &gt; 0.4Å</u> | <u>Ramachandran</u> | <u>Rotamer</u> | <u>Cβ deviation</u> | <u>Bond lengths</u> | <u>Bond angles</u> | <u>Cis Peptides</u> |
|---|----------------|---------------|------------------------|---------------------|----------------|---------------------|---------------------|--------------------|---------------------|
|---|----------------|---------------|------------------------|---------------------|----------------|---------------------|---------------------|--------------------|---------------------|

|  |                  |                |                     |                    |                    |                    |                     |
|--|------------------|----------------|---------------------|--------------------|--------------------|--------------------|---------------------|
|  | Avg: Clashscore: | Outliers: 1 of | Poor rotamers: 0 of | Outliers: 0 of 322 | Outliers: 0 of 347 | Outliers: 0 of 347 | Non-Trans: 1 of 345 |
|  | 29.18            | 5              | 340                 | 287                |                    |                    |                     |

|     |           |   |   |   |   |   |   |   |   |
|-----|-----------|---|---|---|---|---|---|---|---|
| S   | HOH 40.59 | - | - | - | - | - | - | - | - |
| 233 |           |   |   |   |   |   |   |   |   |
| S   | HOH 38.23 | - | - | - | - | - | - | - | - |
| 234 |           |   |   |   |   |   |   |   |   |
| S   | HOH 44.76 | - | - | - | - | - | - | - | - |
| 235 |           |   |   |   |   |   |   |   |   |



|     |     |       |                                 |   |   |   |   |   |   |   |
|-----|-----|-------|---------------------------------|---|---|---|---|---|---|---|
| S   |     |       |                                 |   |   |   |   |   |   |   |
| 236 | HOH | 33.8  | -                               | - | - | - | - | - | - | - |
| S   |     |       |                                 |   |   |   |   |   |   |   |
| 237 | HOH | 48.35 | -                               | - | - | - | - | - | - | - |
| S   |     |       |                                 |   |   |   |   |   |   |   |
| 238 | HOH | 42.89 | -                               | - | - | - | - | - | - | - |
| S   |     |       |                                 |   |   |   |   |   |   |   |
| 239 | HOH | 44.32 | -                               | - | - | - | - | - | - | - |
| S   |     |       |                                 |   |   |   |   |   |   |   |
| 240 | HOH | 26.71 | -                               | - | - | - | - | - | - | - |
| S   |     |       |                                 |   |   |   |   |   |   |   |
| 241 | HOH | 34.87 | 0.85Å<br>O with A 11<br>GLU OE1 | - | - | - | - | - | - | - |
| S   |     |       |                                 |   |   |   |   |   |   |   |
| 242 | HOH | 28.41 | -                               | - | - | - | - | - | - | - |
| S   |     |       |                                 |   |   |   |   |   |   |   |
| 243 | HOH | 35.96 | 0.57Å<br>O with A 97<br>ASP OD1 | - | - | - | - | - | - | - |
| S   |     |       |                                 |   |   |   |   |   |   |   |
| 244 | HOH | 33.34 | -                               | - | - | - | - | - | - | - |
| S   |     |       |                                 |   |   |   |   |   |   |   |
| 245 | HOH | 50.32 | -                               | - | - | - | - | - | - | - |
| S   |     |       |                                 |   |   |   |   |   |   |   |
| 246 | HOH | 31.1  | -                               | - | - | - | - | - | - | - |
| S   |     |       |                                 |   |   |   |   |   |   |   |
| 247 | HOH | 36.32 | -                               | - | - | - | - | - | - | - |
| S   |     |       |                                 |   |   |   |   |   |   |   |
| 248 | HOH | 20.6  | -                               | - | - | - | - | - | - | - |
| S   |     |       |                                 |   |   |   |   |   |   |   |
| 249 | HOH | 26.22 | -                               | - | - | - | - | - | - | - |
| S   |     |       |                                 |   |   |   |   |   |   |   |
| 250 | HOH | 32.22 | -                               | - | - | - | - | - | - | - |
| S   |     |       |                                 |   |   |   |   |   |   |   |
| 251 | HOH | 30.16 | -                               | - | - | - | - | - | - | - |
| S   |     |       |                                 |   |   |   |   |   |   |   |
| 252 | HOH | 36.21 | -                               | - | - | - | - | - | - | - |

| # | Alt | Res | High<br>B | Clash ><br>0.4Å | Ramachandran | Rotamer | Cβ<br>deviation | Bond<br>lengths | Bond<br>angles | Cis<br>Peptides |
|---|-----|-----|-----------|-----------------|--------------|---------|-----------------|-----------------|----------------|-----------------|
|---|-----|-----|-----------|-----------------|--------------|---------|-----------------|-----------------|----------------|-----------------|

|  |  |  |                  |                |                     |                    |                    |                    |                     |
|--|--|--|------------------|----------------|---------------------|--------------------|--------------------|--------------------|---------------------|
|  |  |  | Avg: Clashscore: | Outliers: 1 of | Poor rotamers: 0 of | Outliers: 0 of 322 | Outliers: 0 of 347 | Outliers: 0 of 347 | Non-Trans: 1 of 345 |
|  |  |  | 29.18            | 5              | 340                 | 287                |                    |                    |                     |

|     |     |       |   |   |   |   |   |   |   |   |
|-----|-----|-------|---|---|---|---|---|---|---|---|
| S   |     |       |   |   |   |   |   |   |   |   |
| 253 | HOH | 41.52 | - | - | - | - | - | - | - | - |
| S   |     |       |   |   |   |   |   |   |   |   |
| 254 | HOH | 33.49 | - | - | - | - | - | - | - | - |

|          |           |                                   |   |   |   |   |   |   |
|----------|-----------|-----------------------------------|---|---|---|---|---|---|
| S<br>255 | HOH 45.6  | -                                 | - | - | - | - | - | - |
| S<br>256 | HOH 49.77 | -                                 | - | - | - | - | - | - |
| S<br>257 | HOH 26.33 | -                                 | - | - | - | - | - | - |
| S<br>258 | HOH 45.13 | -                                 | - | - | - | - | - | - |
| S<br>259 | HOH 45.7  | 0.43 Å<br>O with A 29<br>LYS NZ   | - | - | - | - | - | - |
| S<br>260 | HOH 44.19 | 0.41 Å<br>O with A 303<br>LYS HB2 | - | - | - | - | - | - |
| S<br>261 | HOH 47.53 | -                                 | - | - | - | - | - | - |
| S<br>262 | HOH 35.38 | -                                 | - | - | - | - | - | - |
| S<br>263 | HOH 45.76 | -                                 | - | - | - | - | - | - |
| S<br>264 | HOH 39.55 | -                                 | - | - | - | - | - | - |
| S<br>265 | HOH 42.7  | -                                 | - | - | - | - | - | - |
| S<br>266 | HOH 35.81 | -                                 | - | - | - | - | - | - |

About [MolProbity](#) | Website for [the Richardson Lab](#) | Using ecloud x-H | Internal reference 4.4
